# Supplementary material
Source: publisher figshare collection journal article supplement (https://gsajournals.figshare.com/articles/dataset/_/7728512)
Supplement: Supplementary file 1 [file 2]

## Sheet: Table_S1
Supplementary information of the manuscript entitled "The chromosome-level genome assembly of European grayling reveals aspects of a unique genome evolution process within salmonids" by Sävilammi et al.
Table S1: Mapping and sequence information for each of the assembled European grayling chromosomes.
European grayling							Atlantic salmon corresponding chromosome name	Pike corresponding chromosome name
Chromosome id	Chromosome size (in base pairs)	% GC	% of known bases	Linkage group name1	Linkage group size	RAD marker number
1A	31711397	0.43	0.94	Tar_LG24	82.8	94	Ssa20b	Esox_01
1B	33598472	0.42	0.95	Tar_LG05	81.7	232	Ssa09c	Esox_01
2A	39580497	0.43	0.94	Tar_LG11_26*	48.1	214	Ssa26	Esox_02
2B	23618429	0.43	0.96	Tar_LG26_11*	69.5	92	Ssa11a	Esox_02
3A	37010381	0.43	0.95	Tar_LG13	48.6	160	Ssa14a	Esox_03
3B	34063472	0.43	0.94	Tar_LG38	84.5	66	Ssa03a	Esox_03
4A	29258592	0.43	0.94	Tar_LG07	70	246	Ssa09b(mid)	Esox_04
4B	33018251	0.43	0.94	Tar_LG37	76	51	Ssa05a	Esox_04
5A	19586853	0.43	0.96	Tar_LG43	39.1	40	Ssa19b	Esox_05
5B	32952906	0.43	0.95	Tar_LG14	55.9	144	Ssa28	Esox_05
6A	40191757	0.43	0.95	Tar_LG18	92.7	131	Ssa01b(mid)	Esox_06
6B	27402262	0.42	0.95	Tar_LG30	47.5	81	Ssa18a	Esox_06
7A	38766653	0.43	0.96	Tar_LG27	100.2	91	Ssa13b	Esox_07
7B	40331435	0.43	0.95	Tar_LG19	94.2	145	Ssa04b	Esox_07
8A	34717018	0.42	0.97	Tar_LG01	46	329	Ssa23	Esox_08
8B	40237083	0.42	0.96	Tar_LG34	65.1	78	Ssa10a	Esox_08
9A	8327715	0.43	0.93	Tar_LG60_ssa02**			Ssa02b	Esox_09
9B	8230926	0.43	0.92	Tar_LG60_ssa12**			Ssa12a	Esox_09
10A	29060487	0.43	0.96	Tar_LG20	51.7	137	Ssa27	Esox_10
10B	29192016	0.43	0.96	Tar_LG36	60.4	73	Ssa14b	Esox_10
11A	23614990	0.43	0.92	Tar_LG35_06*	52.6	65	Ssa06a	Esox_11
11B	36207966	0.43	0.95	Tar_LG08_03*	53.3	227	Ssa03b	Esox_11
12A	35017223	0.43	0.96	Tar_LG32	55.7	84	Ssa13a	Esox_12
12B	32865966	0.43	0.97	Tar_LG31	86.9	83	Ssa15b	Esox_12
13A	25563215	0.43	0.95	Tar_LG25	55.1	101	Ssa24	Esox_13
13B	35930200	0.43	0.95	Tar_LG10	84.5	221	Ssa20a	Esox_13
13C	7402266	0.42	0.95	Tar_LG45	7.8	30	Ssa24	Esox_13
14A	26006002	0.43	0.95	Tar_LG40	35.9	66	Ssa01c	Esox_14
14B	32114484	0.43	0.96	Tar_LG22	68.1	139	Ssa11b	Esox_14
15A	34557991	0.43	0.96	Tar_LG03	58.6	293	Ssa09a	Esox_15
15B	35791600	0.42	0.96	Tar_LG04	86.9	269	Ssa01a	Esox_15
16A	39707183	0.43	0.95	Tar_LG17	72.7	169	Ssa21	Esox_16
16B	36260421	0.43	0.96	Tar_LG09	106.1	202	Ssa25	Esox_16
17A	41090972	0.43	0.94	Tar_LG21	106.1	122	Ssa12b	Esox_17
17B	44100497	0.42	0.96	Tar_LG29	56.4	75	Ssa22	Esox_17
18A	32090924	0.43	0.95	Tar_LG02	84.9	302	Ssa15a	Esox_18
18B	30355092	0.43	0.95	Tar_LG06	79.1	242	Ssa06b	Esox_18
19A	44988017	0.43	0.96	Tar_LG28	86.8	88	Ssa10b	Esox_19
19B	32985317	0.43	0.95	Tar_LG41	80.2	47	Ssa16a	Esox_19
20A	25720501	0.43	0.92	Tar_LG33_05*	79.9	67	Ssa05b	Esox_20
20B	31447095	0.43	0.95	Tar_LG15	47	154	Ssa02a	Esox_20
21A	27703283	0.43	0.94	Tar_LG23	46.6	93	Ssa29	Esox_21
21B	30422608	0.43	0.96	Tar_LG12	73.1	187	Ssa19a	Esox_21
22A	12821563	0.43	0.94	Tar_LG46	0	19	Ssa17a	Esox_22
22B	10448289	0.43	0.95	Tar_LG47	0	10	Ssa16b	Esox_22
23A	24855866	0.43	0.96	Tar_LG16_ssa07*	62.3	156	Ssa07b	Esox_23
23B	20764677	0.42	0.96	Tar_LG39_ssa17*	39.2	62	Ssa17b	Esox_23
24A	27354797	0.43	0.95	Tar_LG42	122.8	57	Ssa07a	Esox_24
24B	21501505	0.43	0.95	Tar_LG44	41.2	36	Ssa18b	Esox_24
25A	8179806	0.43	0.97	Tar_LG48_ssa04**	0	6	Ssa04a	Esox_25
25B	6483087	0.43	0.95	Tar_LG48_ssa08**			Ssa08a	Esox_25
1Linkage groups marked with an asterisk (*), indicate cases with close identity between homeologs. Linkage groups marked with a double asterisk (**), indicate cases with detected pseudolinkage that resulted to shared linkage map information.

## Sheet: Table_S2
Supplementary information of the manuscript entitled "The chromosome-level genome assembly of European grayling reveals aspects of a unique genome evolution process within salmonids" by Sävilammi et al.
Table S2: Markers included in the linkage groups in 6 map unit bins.
Chromosome	Mean map position of markers in the bin	Markers in the bin	Marker names	Marker locations in scaffolds
1A	0.0108889	9	6697, 702, 701, 700, 699, 7166, 2144, 2145, 842	Contig7716:64576, Contig502:364913, Contig502:130193, Contig502:130186, Contig502:81571, Contig9981:79754, Contig1435:567816, Contig1435:567817, Contig587:224053
1A	15.1525	8	4264, 4263, 4262, 6771, 7316, 7317, 7318, 7315	Contig3233:324292, Contig3233:298741, Contig3233:80892, Contig8075:342009, Contig10854:22313, Contig10854:22351, Contig10854:22426, Contig10853:17421
1A	24.664	2	5316, 4021	Contig4661:578743, Contig3078:1231115
1A	33.429	1	4020	Contig3078:785994
1A	39.3248	20	3499, 3705, 261, 3067, 7043, 7281, 7282, 7283, 7284, 7389, 4998, 4997, 4996, 4994, 4993, 4723, 2342, 2341, 6601, 4013	Contig2467:237242, Contig2746:164210, Contig155:120387, Contig2139:131695, Contig9297:138674, Contig10647:24670, Contig10647:24688, Contig10647:24722, Contig10647:24723, Contig11397:82698, Contig4249:195300, Contig4249:52880, Contig4249:50762, Contig4249:19520, Contig4249:19466, Contig3832:50146, Contig1545:761108, Contig1545:560857, Contig7423:691781, Contig3069:320845
1A	45.3237	7	4014, 4015, 4542, 7062, 7061, 7060, 7059	Contig3069:361709, Contig3069:432096, Contig3571:206509, Contig9333:376966, Contig9333:355958, Contig9333:306043, Contig9333:31146
1A	51.1266	9	4925, 4924, 3739, 3738, 5743, 5744, 5745, 4529, 4530	Contig4127:229504, Contig4127:229476, Contig2781:161018, Contig2781:160966, Contig5337:30003, Contig5337:242090, Contig5337:287043, Contig3561:42045, Contig3561:654633
1A	62.1931	18	2766, 2767, 2768, 2769, 2770, 2771, 5825, 5346, 5345, 5344, 5343, 5342, 4239, 4238, 4237, 1129, 1128, 6985	Contig1865:678766, Contig1865:678872, Contig1865:686435, Contig1865:692702, Contig1865:746745, Contig1865:1038058, Contig5553:21738, Contig4691:165979, Contig4691:101405, Contig4691:78892, Contig4691:22233, Contig4691:22136, Contig3209:223815, Contig3209:96176, Contig3209:96174, Contig804:290898, Contig804:290483, Contig9090:81291
1A	71.628	8	925, 926, 927, 928, 2013, 2014, 2015, 2016	Contig649:240871, Contig649:240959, Contig649:240990, Contig649:409289, Contig1375:130046, Contig1375:334987, Contig1375:337311, Contig1375:431317
1A	74.964	3	3724, 1301, 1302	Contig2767:327487, Contig913:359358, Contig913:359396
1A	82.3358	9	24, 23, 4482, 4481, 2935, 2934, 6413, 6412, 5665	Contig3:168680, Contig3:168647, Contig3505:89742, Contig3505:89736, Contig2027:257167, Contig2027:123034, Contig6846:32993, Contig6846:32975, Contig5224:41005
1B	2.80425	12	667, 5257, 5258, 6280, 1555, 1556, 4604, 1561, 1560, 1559, 1558, 1557	Contig489:75614, Contig4580:173338, Contig4580:173395, Contig6529:16926, Contig1092:204463, Contig1093:152755, Contig3632:134888, Contig1094:531336, Contig1094:240992, Contig1094:240988, Contig1094:240977, Contig1094:240976
1B	10.0525	28	3889, 3888, 3887, 3886, 5730, 5729, 6345, 6344, 6343, 6342, 6341, 6340, 6339, 6338, 6336, 6335, 6334, 6333, 6332, 6331, 6330, 6329, 7604, 5244, 5243, 5242, 5241, 5240	Contig2940:787257, Contig2940:787237, Contig2940:687813, Contig2940:441352, Contig5327:116452, Contig5327:116450, Contig6598:366173, Contig6598:366112, Contig6598:366108, Contig6598:290685, Contig6598:290625, Contig6598:290623, Contig6598:248841, Contig6598:248828, Contig6598:239129, Contig6598:239057, Contig6598:136729, Contig6598:136701, Contig6598:107084, Contig6598:107054, Contig6598:15114, C…
1B	14.7711	29	5239, 5238, 5237, 5236, 5235, 5234, 5233, 5232, 5231, 5230, 5249, 5251, 5252, 5253, 5901, 5902, 5903, 5904, 5905, 5906, 5907, 5908, 5909, 5910, 5911, 5912, 5913, 5914, 273	Contig4561:556252, Contig4561:367727, Contig4561:307531, Contig4561:307512, Contig4561:258918, Contig4561:258820, Contig4561:258766, Contig4561:224889, Contig4561:185346, Contig4561:128512, Contig4562:322686, Contig4562:390324, Contig4562:390333, Contig4562:401234, Contig5743:139145, Contig5743:143899, Contig5743:144071, Contig5743:144074, Contig5743:186513, Contig5743:234195, Contig5743:234291, …
1B	23.649	24	272, 271, 270, 269, 268, 267, 1299, 1298, 1296, 2137, 2138, 2139, 2140, 2141, 2142, 2143, 2472, 2473, 2476, 2477, 2478, 2479, 2480, 6793	Contig165:300420, Contig165:255680, Contig165:145350, Contig165:145317, Contig165:56362, Contig165:56317, Contig909:820767, Contig909:820677, Contig909:227730, Contig1434:12460, Contig1434:27292, Contig1434:27855, Contig1434:27914, Contig1434:65917, Contig1434:107278, Contig1434:107324, Contig1664:25432, Contig1664:49838, Contig1664:137928, Contig1664:137943, Contig1664:137986, Contig1664:138008,…
1B	26.197	3	5143, 5142, 5141	Contig4451:512813, Contig4451:418036, Contig4451:417929
1B	30.9824	45	6396, 6395, 6394, 6393, 6392, 6954, 6953, 6952, 7093, 7094, 7095, 7096, 7097, 7098, 6265, 6264, 6263, 6262, 6261, 7088, 7087, 2280, 2279, 2278, 2276, 2275, 2678, 2679, 2680, 2681, 2682, 2683, 2684, 2685, 2686, 2687, 2696, 2695, 2694, 2693, 2690, 2689, 2688, 21, 22	Contig6810:729257, Contig6810:608247, Contig6810:385837, Contig6810:375795, Contig6810:53253, Contig8970:66414, Contig8970:66361, Contig8970:7105, Contig9630:2157, Contig9630:2158, Contig9630:2186, Contig9630:20371, Contig9630:65143, Contig9630:65258, Contig6491:226658, Contig6491:226580, Contig6491:224468, Contig6491:224451, Contig6491:217811, Contig9600:32893, Contig9600:32809, Contig1496:48797…
1B	36.344	13	6522, 7100, 7099, 1175, 1176, 885, 884, 883, 882, 4457, 4458, 4459, 4460	Contig7109:154638, Contig9648:15749, Contig9648:15692, Contig824:67683, Contig824:72650, Contig610:330167, Contig610:93152, Contig610:93119, Contig610:92994, Contig3438:548655, Contig3438:565460, Contig3438:565469, Contig3438:596236
1B	51.563	8	6172, 6173, 6174, 6175, 7071, 7072, 7073, 7074	Contig6219:9677, Contig6219:84714, Contig6219:84758, Contig6219:106030, Contig9425:71170, Contig9425:71273, Contig9425:71274, Contig9425:71275
1B	57.109	5	4956, 4954, 4953, 4952, 7677	Contig4178:241629, Contig4178:148868, Contig4178:103907, Contig4178:103813, Contig17191:2855
1B	69.8131	27	4214, 4213, 4212, 4211, 4543, 4544, 4545, 4546, 4915, 4916, 4917, 4918, 5302, 5303, 5304, 5305, 5306, 5307, 1627, 1628, 1629, 1630, 1631, 1632, 1633, 1634, 1635	Contig3173:155160, Contig3173:155150, Contig3173:155138, Contig3173:139952, Contig3574:4457, Contig3574:4461, Contig3574:4468, Contig3574:4590, Contig4111:236379, Contig4111:321882, Contig4111:510381, Contig4111:747219, Contig4635:4742, Contig4635:23401, Contig4635:23532, Contig4635:97932, Contig4635:98029, Contig4635:125966, Contig1140:90418, Contig1140:97892, Contig1140:97936, Contig1140:126478…
1B	75.1875	30	1636, 1637, 1638, 1639, 1640, 4651, 4652, 4653, 4654, 4655, 4656, 4657, 4658, 4659, 5867, 4937, 397, 398, 399, 400, 3555, 3556, 1985, 4874, 5440, 5439, 5438, 2794, 2793, 2792	Contig1140:332079, Contig1140:474446, Contig1140:583020, Contig1140:650610, Contig1140:650617, Contig3737:593468, Contig3737:593479, Contig3737:593610, Contig3737:593612, Contig3737:593614, Contig3737:593615, Contig3737:593618, Contig3737:1040363, Contig3737:1089206, Contig5673:290665, Contig4161:293092, Contig277:168682, Contig277:323032, Contig277:323033, Contig277:323039, Contig2582:94094, Con…
1B	81.76	8	5374, 5375, 5376, 4564, 4566, 7158, 7159, 7157	Contig4762:46707, Contig4762:46711, Contig4762:46840, Contig3596:36196, Contig3597:1911, Contig9965:2534, Contig9965:2603, Contig9964:611
2A	2.42544	25	7147, 7146, 5596, 6322, 6321, 5383, 5382, 5381, 5380, 1841, 1842, 200, 201, 202, 203, 204, 205, 206, 215, 216, 217, 218, 219, 220, 221	Contig9944:47180, Contig9944:14865, Contig5040:13236, Contig6570:159248, Contig6570:159179, Contig4777:400429, Contig4777:400341, Contig4777:361582, Contig4777:361504, Contig1249:36137, Contig1249:36295, Contig122:16692, Contig122:221237, Contig122:241033, Contig122:241043, Contig122:241044, Contig122:241053, Contig122:241117, Contig128:104463, Contig128:104484, Contig128:104641, Contig128:474611…
2A	10.4317	13	1027, 6414, 5669, 5670, 5671, 5672, 5823, 5824, 7459, 7460, 6279, 6278, 6277	Contig696:35159, Contig6853:96103, Contig5257:24163, Contig5257:24260, Contig5257:83345, Contig5257:129668, Contig5549:39623, Contig5549:39660, Contig12046:9126, Contig12046:88291, Contig6523:506441, Contig6523:425538, Contig6523:415233
2A	12.776	3	6276, 6275, 6274	Contig6523:335996, Contig6523:325762, Contig6523:267494
2A	22.157	30	6232, 6231, 6452, 6453, 3516, 3517, 3710, 3709, 3708, 3707, 5483, 5482, 5481, 5480, 5479, 5478, 5477, 5476, 5475, 5474, 5473, 5472, 5471, 5470, 5469, 5468, 4258, 4257, 4256, 4255	Contig6392:99812, Contig6392:75053, Contig6938:85342, Contig6938:85473, Contig2494:291655, Contig2494:307225, Contig2750:153192, Contig2750:153181, Contig2750:134567, Contig2750:108887, Contig4856:765152, Contig4856:765108, Contig4856:765076, Contig4856:754759, Contig4856:728764, Contig4856:728733, Contig4856:725372, Contig4856:725352, Contig4856:672206, Contig4856:672136, Contig4856:482204, Cont…
2A	28.3053	23	3107, 3108, 3109, 3110, 3111, 3112, 3113, 3114, 3737, 831, 830, 829, 828, 4370, 4369, 4368, 4367, 4366, 4365, 4364, 4363, 4362, 4361	Contig2157:143472, Contig2157:173799, Contig2157:173924, Contig2157:316515, Contig2157:316605, Contig2157:349990, Contig2157:360315, Contig2157:360376, Contig2779:36842, Contig581:391807, Contig581:391802, Contig581:354345, Contig581:354274, Contig3342:763440, Contig3342:743975, Contig3342:730832, Contig3342:730831, Contig3342:578907, Contig3342:578745, Contig3342:521546, Contig3342:513107, Conti…
2A	33.5816	54	4360, 1491, 1492, 355, 4412, 4411, 4410, 4409, 4408, 4407, 4406, 4405, 4403, 4402, 4401, 4400, 7599, 6457, 6456, 6455, 6454, 6583, 7441, 7443, 7444, 7445, 7446, 338, 339, 340, 341, 342, 343, 345, 346, 347, 348, 349, 350, 351, 6634, 910, 911, 909, 908, 907, 2651, 6142, 6141, 6140, 5162, 3775, 3776, 3777	Contig3342:152322, Contig1037:233470, Contig1037:312575, Contig254:53456, Contig3402:921237, Contig3402:783158, Contig3402:783099, Contig3402:593228, Contig3402:593212, Contig3402:516748, Contig3402:443151, Contig3402:443097, Contig3402:34572, Contig3402:34570, Contig3402:34503, Contig3402:34487, Contig13975:515, Contig6946:123188, Contig6946:123183, Contig6946:123084, Contig6946:91533, Contig736…
2A	39.5001	27	6835, 6836, 6837, 6838, 5855, 6834, 4791, 5791, 5792, 5794, 6308, 6307, 6306, 4042, 4043, 4044, 4045, 4046, 4047, 4048, 4049, 4951, 4950, 1035, 1036, 1038, 1040	Contig8299:41773, Contig8299:41776, Contig8299:41780, Contig8299:41948, Contig5617:44556, Contig8298:20140, Contig3904:9232, Contig5448:41893, Contig5448:41916, Contig5448:220708, Contig6551:246338, Contig6551:176329, Contig6551:147789, Contig3090:121138, Contig3090:121163, Contig3090:257649, Contig3090:297444, Contig3090:337102, Contig3090:348814, Contig3090:425557, Contig3090:425561, Contig4177…
2A	44.1166	30	4846, 4847, 4848, 4849, 4850, 4851, 4820, 5591, 5025, 5024, 5023, 5022, 5021, 5020, 1270, 1269, 6170, 6169, 6168, 6167, 6166, 3328, 7461, 7462, 7463, 4189, 4188, 4187, 4186, 4185	Contig4012:51558, Contig4012:179976, Contig4012:207343, Contig4012:215119, Contig4012:215125, Contig4012:215141, Contig3940:49793, Contig5013:107742, Contig4296:417071, Contig4296:416994, Contig4296:416976, Contig4296:321988, Contig4296:306686, Contig4296:306648, Contig870:16245, Contig870:16232, Contig6215:417204, Contig6215:417191, Contig6215:417181, Contig6215:417152, Contig6215:417135, Contig…
2A	48.0547	9	5372, 5371, 5370, 5369, 5368, 4629, 6503, 6158, 6159	Contig4751:252339, Contig4751:252328, Contig4751:252327, Contig4751:237421, Contig4751:237417, Contig3693:227397, Contig7061:95399, Contig6205:2767, Contig6205:2775
2B	0	6	914, 913, 912, 1276, 1275, 2936	Contig638:174644, Contig638:174634, Contig638:174633, Contig873:136347, Contig873:136273, Contig2029:247904
2B	8.361	1	2937	Contig2029:345397
2B	14.949	6	3390, 3389, 3388, 3387, 3386, 3385	Contig2404:860082, Contig2404:860052, Contig2404:303336, Contig2404:144731, Contig2404:144719, Contig2404:123692
2B	19.4703	11	406, 405, 404, 403, 402, 401, 6951, 408, 6143, 5079, 5080	Contig278:284304, Contig278:284264, Contig278:284215, Contig278:284161, Contig278:182467, Contig278:55196, Contig8960:16062, Contig280:44853, Contig6188:557068, Contig4375:225761, Contig4375:225786
2B	28.3789	17	5082, 4821, 2540, 2541, 2542, 2543, 1716, 1715, 1714, 1713, 4503, 4504, 4505, 7570, 5989, 4525, 4526	Contig4375:547611, Contig3941:40308, Contig1711:326495, Contig1711:326523, Contig1711:412330, Contig1711:464675, Contig1172:416712, Contig1172:416686, Contig1172:416676, Contig1172:416564, Contig3540:168777, Contig3540:306743, Contig3540:312771, Contig13424:4452, Contig5858:15122, Contig3553:9902, Contig3553:336255
2B	30.941	2	7595, 7596	Contig13905:96473, Contig13905:96474
2B	43.3932	37	6955, 3778, 4764, 4765, 4766, 1461, 6972, 6971, 4970, 4173, 4174, 4175, 4176, 3769, 3770, 7002, 7000, 6999, 6998, 6997, 6996, 4260, 4259, 2154, 2153, 2152, 2151, 2150, 1843, 1844, 1696, 1695, 7272, 5930, 5899, 5900, 6689	Contig8975:40396, Contig2839:43131, Contig3853:79194, Contig3853:250177, Contig3853:303168, Contig1011:405088, Contig9080:48743, Contig9080:41193, Contig4217:103288, Contig3148:158712, Contig3148:162711, Contig3148:162757, Contig3148:162773, Contig2811:159698, Contig2811:250412, Contig9133:524536, Contig9133:410803, Contig9133:410783, Contig9133:410743, Contig9133:298662, Contig9133:235332, Conti…
2B	69.3987	12	2175, 2174, 2173, 2172, 6093, 6092, 6091, 5839, 5840, 1044, 1029, 1028	Contig1455:681548, Contig1455:603662, Contig1455:291772, Contig1455:291714, Contig6089:363304, Contig6089:56970, Contig6089:56875, Contig5576:84043, Contig5576:84054, Contig715:53611, Contig699:55473, Contig699:55458
3A	2.22574	47	4337, 4338, 4339, 4340, 4886, 1832, 1833, 1834, 1835, 1836, 1837, 493, 494, 495, 496, 497, 801, 800, 799, 797, 1172, 1171, 1170, 1169, 1168, 1167, 1166, 1165, 1164, 1163, 1162, 6530, 6528, 6527, 3265, 3266, 978, 979, 980, 6590, 6589, 6557, 6556, 6555, 6554, 1616, 1617	Contig3311:172694, Contig3311:207403, Contig3311:207945, Contig3311:207966, Contig4087:94165, Contig1242:20058, Contig1242:150423, Contig1242:150595, Contig1242:277296, Contig1242:386345, Contig1242:454470, Contig355:316799, Contig355:316812, Contig355:316938, Contig355:316953, Contig355:489716, Contig560:1308523, Contig560:1308482, Contig560:1308422, Contig560:27867, Contig820:665735, Contig820:…
3A	9.1293	57	1620, 1621, 1622, 1623, 1624, 1625, 1626, 5865, 5864, 4278, 4280, 4281, 4283, 4082, 4081, 4080, 4079, 4078, 4077, 4076, 4075, 4074, 7479, 657, 656, 655, 4023, 4024, 4025, 4026, 4027, 4028, 4029, 4030, 4031, 4032, 4033, 4034, 4035, 4036, 4037, 4038, 4039, 4040, 5984, 5983, 5982, 5981, 5980, 5979, 5978, 5977, 5560, 5559, 5558, 278, 277	Contig1136:638041, Contig1136:716702, Contig1136:716722, Contig1136:716746, Contig1136:716775, Contig1136:736521, Contig1136:741658, Contig5660:76849, Contig5660:76799, Contig3263:63983, Contig3263:136346, Contig3263:136378, Contig3263:564170, Contig3112:481885, Contig3112:376000, Contig3112:375977, Contig3112:25985, Contig3112:25966, Contig3112:25957, Contig3112:25943, Contig3112:25918, Contig31…
3A	14.3229	18	156, 155, 151, 150, 149, 148, 147, 145, 144, 143, 4218, 4219, 4221, 4222, 4223, 4224, 4225, 4226	Contig115:693825, Contig115:686798, Contig115:477238, Contig115:477201, Contig115:477200, Contig115:477127, Contig115:163748, Contig115:138044, Contig115:133576, Contig115:133453, Contig3190:458864, Contig3190:496916, Contig3190:650072, Contig3190:650096, Contig3190:650147, Contig3190:767506, Contig3190:810482, Contig3190:950085
3A	18.34	3	4227, 4228, 4229	Contig3190:1070923, Contig3190:1070964, Contig3190:1070986
3A	27.3635	12	7125, 2886, 4971, 2780, 2779, 2778, 2777, 2776, 2775, 2774, 2773, 2772	Contig9866:54840, Contig1967:646672, Contig4218:170497, Contig1868:1826833, Contig1868:888724, Contig1868:879018, Contig1868:397572, Contig1868:385514, Contig1868:385512, Contig1868:385507, Contig1868:385473, Contig1868:385383
3A	32.5393	7	2784, 2783, 2782, 2781, 4887, 4888, 7420	Contig1869:42010, Contig1869:41961, Contig1869:41960, Contig1869:41941, Contig4088:66358, Contig4088:66415, Contig11625:2344
3A	38.4003	3	2334, 1025, 4921	Contig1533:397669, Contig694:303347, Contig4123:35447
3A	45.7809	9	3952, 3951, 616, 615, 614, 613, 612, 618, 6819	Contig3010:1253998, Contig3010:1191567, Contig427:146782, Contig427:146690, Contig427:146657, Contig427:61226, Contig427:54429, Contig428:54061, Contig8240:498760
3A	48.4365	4	3682, 3441, 4236, 7638	Contig2709:208974, Contig2433:28394, Contig3201:142623, Contig14598:13082
3B	0.80415	20	7108, 812, 2466, 2467, 1515, 1514, 1513, 1512, 1511, 2489, 2488, 2487, 7172, 7173, 7174, 7175, 2490, 1971, 1969, 6624	Contig9697:37363, Contig564:182770, Contig1649:161858, Contig1649:259508, Contig1074:116918, Contig1074:116917, Contig1074:116914, Contig1074:116913, Contig1074:116843, Contig1674:252876, Contig1674:213492, Contig1674:213487, Contig10014:40113, Contig10014:40131, Contig10014:40168, Contig10014:40172, Contig1675:185535, Contig1336:576990, Contig1335:43773, Contig7508:227555
3B	7.8488	5	7524, 7525, 1093, 5943, 5942	Contig12752:27148, Contig12752:27162, Contig738:202749, Contig5810:48527, Contig5810:48469
3B	16.376	2	4492, 4491	Contig3531:22167, Contig3531:799
3B	23.3623	15	1726, 1725, 1724, 1723, 4972, 5053, 2640, 2641, 142, 141, 235, 236, 237, 4358, 4359	Contig1175:299837, Contig1175:299820, Contig1175:174398, Contig1175:174378, Contig4219:91427, Contig4351:308257, Contig1788:695574, Contig1788:695616, Contig113:475086, Contig113:374610, Contig137:109796, Contig137:109798, Contig137:349902, Contig3334:89364, Contig3334:89397
3B	51.7782	5	2642, 2643, 2644, 2647, 2761	Contig1789:803552, Contig1789:1191973, Contig1789:1347575, Contig1789:1806801, Contig1860:234701
3B	55.219	1	2878	Contig1947:1103814
3B	75.2884	7	6860, 1024, 1023, 1022, 1021, 1020, 1019	Contig8525:73875, Contig690:942439, Contig690:942428, Contig690:334274, Contig690:319280, Contig690:319188, Contig690:319144
3B	79.001	5	1018, 1017, 5893, 5892, 3812	Contig690:105852, Contig690:12047, Contig5719:746987, Contig5719:392686, Contig2877:6394
3B	84.5135	6	3813, 3815, 3816, 3817, 3818, 3819	Contig2877:320575, Contig2877:447794, Contig2877:447796, Contig2877:447799, Contig2877:447874, Contig2877:447899
4A	1.84667	15	5073, 5072, 3914, 3913, 3912, 3911, 3910, 3909, 3908, 3907, 6087, 6086, 6085, 6084, 6083	Contig4362:110057, Contig4362:38113, Contig2971:186782, Contig2971:186764, Contig2971:186755, Contig2971:186748, Contig2971:186734, Contig2971:58762, Contig2971:58708, Contig2971:54209, Contig6058:30627, Contig6058:30616, Contig6058:30613, Contig6058:30570, Contig6058:30517
4A	7.67262	37	772, 771, 770, 769, 768, 767, 766, 765, 764, 6487, 6486, 6485, 6484, 1411, 1412, 1413, 1414, 1415, 1416, 1417, 1418, 1419, 1420, 1421, 1271, 1272, 1273, 1274, 6825, 6826, 310, 311, 312, 313, 6983, 66, 65	Contig546:274340, Contig546:274305, Contig546:239742, Contig546:239717, Contig546:231759, Contig546:231757, Contig546:231654, Contig546:231649, Contig546:215994, Contig7004:358766, Contig7004:244585, Contig7004:125315, Contig7004:32834, Contig992:11209, Contig992:11214, Contig992:11231, Contig992:224441, Contig992:230781, Contig992:230804, Contig992:230825, Contig992:230832, Contig992:234064, Con…
4A	16.605	10	7326, 7327, 7328, 5719, 5720, 5721, 5722, 5723, 5724, 5725	Contig10970:89314, Contig10970:89318, Contig10970:121251, Contig5318:76161, Contig5318:121491, Contig5318:121498, Contig5318:121520, Contig5318:121539, Contig5318:170099, Contig5318:203361
4A	20.0394	11	5726, 5727, 5728, 5547, 5548, 5549, 5550, 480, 481, 5994, 5993	Contig5318:375482, Contig5318:458421, Contig5318:458444, Contig4931:34947, Contig4931:57481, Contig4931:232509, Contig4931:232650, Contig348:52149, Contig348:113775, Contig5884:128354, Contig5884:128278
4A	29.3662	10	4958, 3171, 3172, 3173, 3174, 3175, 3176, 3177, 3178, 3179	Contig4187:144318, Contig2242:428311, Contig2242:496067, Contig2242:496120, Contig2242:496158, Contig2242:528135, Contig2242:528176, Contig2242:528227, Contig2242:588924, Contig2242:689084
4A	34.0151	55	2840, 2841, 2842, 2844, 2845, 2846, 2847, 2848, 2849, 2851, 2852, 2853, 2854, 2855, 2856, 2857, 2858, 3589, 3588, 6478, 3195, 3196, 3197, 3198, 3199, 3200, 3201, 3202, 6042, 6043, 6044, 6045, 6046, 6047, 6048, 6049, 7052, 7053, 3552, 6647, 6646, 6645, 6644, 3529, 3528, 3526, 3527, 2545, 2544, 5357, 5356, 5355, 5354, 5353, 5352	Contig1921:16066, Contig1921:16096, Contig1921:16108, Contig1921:389165, Contig1921:389333, Contig1921:565091, Contig1921:930803, Contig1921:933422, Contig1921:942540, Contig1921:1192831, Contig1921:1192904, Contig1921:1226370, Contig1921:1226470, Contig1921:1226480, Contig1921:1226502, Contig1921:1226509, Contig1921:1343209, Contig2633:168365, Contig2633:168273, Contig6965:52007, Contig2253:7309…
4A	38.1436	14	4138, 4137, 4136, 4135, 4134, 4133, 3654, 3653, 3652, 3651, 3650, 7020, 7019, 7018	Contig3126:1102588, Contig3126:864777, Contig3126:743176, Contig3126:743085, Contig3126:598541, Contig3126:129377, Contig2680:247425, Contig2680:247329, Contig2680:52450, Contig2680:52443, Contig2680:52420, Contig9221:153119, Contig9221:148465, Contig9221:125352
4A	44.338	19	1094, 1095, 1096, 1097, 1098, 1099, 1100, 4348, 6118, 6119, 6120, 6121, 501, 502, 503, 504, 505, 5632, 7229	Contig739:308804, Contig739:399871, Contig739:399896, Contig739:399956, Contig739:454012, Contig739:454067, Contig739:455401, Contig3320:175460, Contig6144:336808, Contig6144:336830, Contig6144:336843, Contig6144:807207, Contig365:279162, Contig365:279270, Contig365:367624, Contig365:523034, Contig365:523108, Contig5078:242548, Contig10184:802876
4A	50.3706	5	7227, 7226, 7225, 7224, 7223	Contig10184:588660, Contig10184:351361, Contig10184:348267, Contig10184:348252, Contig10184:348250
4A	56.6387	18	7222, 7221, 7220, 7219, 7218, 4601, 4600, 4599, 4598, 4597, 4596, 4595, 4594, 4593, 4592, 4591, 4590, 4589	Contig10184:153483, Contig10184:153481, Contig10184:153479, Contig10184:76413, Contig10184:19979, Contig3627:1129223, Contig3627:1129193, Contig3627:1129149, Contig3627:1110970, Contig3627:1080841, Contig3627:982945, Contig3627:905241, Contig3627:801334, Contig3627:793683, Contig3627:775875, Contig3627:775852, Contig3627:427020, Contig3627:427018
4A	63.1116	34	4588, 4587, 4586, 4585, 4584, 4583, 4582, 4581, 4580, 4579, 4578, 4577, 4576, 4575, 4574, 4573, 4261, 3759, 3758, 5094, 5093, 5092, 5091, 5090, 6966, 6965, 6964, 4197, 4190, 4191, 4192, 4193, 4195, 4196	Contig3627:362248, Contig3627:362235, Contig3627:362229, Contig3627:362223, Contig3627:362209, Contig3627:332263, Contig3627:272958, Contig3627:272946, Contig3627:272925, Contig3627:240587, Contig3627:240585, Contig3627:240546, Contig3627:239739, Contig3627:163641, Contig3627:55565, Contig3627:55467, Contig3232:65366, Contig2799:708115, Contig2799:285045, Contig4416:182219, Contig4416:182140, Con…
4A	69.8182	18	5255, 5446, 5445, 5444, 5443, 5442, 5441, 4727, 4728, 4729, 4730, 4731, 4732, 4733, 5528, 5527, 5526, 4466	Contig4572:196238, Contig4842:451616, Contig4842:381048, Contig4842:240855, Contig4842:232182, Contig4842:228440, Contig4842:217794, Contig3835:2176, Contig3835:99747, Contig3835:99829, Contig3835:227704, Contig3835:263536, Contig3835:263583, Contig3835:267641, Contig4917:181993, Contig4917:181934, Contig4917:181919, Contig3456:7139
4B	0.1775	6	7012, 6769, 6768, 6512, 2413, 3003	Contig9180:28949, Contig8057:13054, Contig8057:323, Contig7076:62605, Contig1600:138154, Contig2092:224531
4B	6.75	2	3004, 1153	Contig2092:326510, Contig815:41978
4B	14.5798	4	4853, 4854, 4855, 3150	Contig4019:106409, Contig4019:106455, Contig4019:110774, Contig2210:308857
4B	27.198	7	140, 248, 247, 7422, 6408, 6409, 6410	Contig112:1189472, Contig146:315441, Contig146:315436, Contig11659:151279, Contig6839:72788, Contig6839:116624, Contig6839:161074
4B	33.088	8	2018, 2017, 5760, 5759, 6673, 6674, 3340, 3339	Contig1378:860077, Contig1378:265144, Contig5375:201227, Contig5375:201139, Contig7666:26123, Contig7666:131773, Contig2360:785586, Contig2360:468142
4B	46.564	6	4864, 4863, 4862, 6326, 6325, 6327	Contig4035:301972, Contig4035:169865, Contig4035:169852, Contig6580:107497, Contig6580:107464, Contig6581:30536
4B	51.8863	3	5838, 5565, 5564	Contig5575:193560, Contig4970:50071, Contig4970:50040
4B	67.932	5	5996, 5995, 2012, 2011, 2010	Contig5889:90549, Contig5889:90477, Contig1372:13633, Contig1372:13577, Contig1372:13475
4B	75.971	10	5150, 5149, 5148, 316, 317, 318, 5732, 5733, 5734, 7171	Contig4470:52314, Contig4470:52302, Contig4470:52206, Contig230:50180, Contig230:50189, Contig230:50277, Contig5329:8372, Contig5329:8407, Contig5329:8511, Contig10013:4528
5A	0.439	17	5846, 5845, 5844, 5843, 6811, 3919, 3965, 3964, 3963, 3962, 5139, 2738, 2736, 2735, 1813, 1238, 1237	Contig5590:236420, Contig5590:236406, Contig5590:236402, Contig5590:8374, Contig8203:78195, Contig2974:368135, Contig3022:61310, Contig3022:61297, Contig3022:61216, Contig3022:61182, Contig4449:293474, Contig1853:1334920, Contig1853:409899, Contig1853:409054, Contig1234:657004, Contig867:2004031, Contig867:2004030
5A	12.6126	9	1235, 1234, 1233, 864, 863, 862, 861, 860, 859	Contig867:1446745, Contig867:1188989, Contig867:1024007, Contig606:126153, Contig606:126126, Contig606:126080, Contig606:126058, Contig606:126046, Contig606:55592
5A	25.906	7	1156, 1155, 1154, 7054, 6090, 2884, 2883	Contig817:968457, Contig817:488768, Contig817:488767, Contig9322:175941, Contig6078:247312, Contig1958:130752, Contig1958:130735
5A	39.098	7	2882, 5447, 5714, 5715, 6088, 7408, 2294	Contig1958:22038, Contig4844:265954, Contig5303:9697, Contig5303:9711, Contig6074:512108, Contig11532:90316, Contig1512:114088
5B	1.05535	46	3858, 3857, 3856, 7217, 7216, 7589, 2503, 7013, 7431, 7430, 1198, 1197, 5532, 5533, 5534, 5535, 5536, 5537, 5538, 5543, 6704, 569, 5085, 5084, 5969, 5970, 5971, 5972, 5973, 5974, 3855, 2654, 2653, 7383, 3106, 3105, 7467, 7466, 7465, 6018, 6019, 6198, 6197, 5349, 7329, 7330	Contig2888:47648, Contig2888:47619, Contig2888:47548, Contig10170:12891, Contig10170:12872, Contig13883:1013, Contig1700:64565, Contig9185:20712, Contig11776:163594, Contig11776:163572, Contig830:58110, Contig830:58071, Contig4923:51274, Contig4923:51317, Contig4923:51340, Contig4923:51369, Contig4923:66456, Contig4923:255900, Contig4923:256020, Contig4923:404958, Contig7756:29552, Contig404:1013…
5B	12.74	28	2380, 3695, 3694, 3693, 3692, 3691, 3690, 6040, 6039, 6038, 6037, 6036, 6943, 6944, 6945, 6946, 6947, 6948, 6949, 6950, 7008, 7122, 5876, 4607, 4608, 1481, 1480, 1479	Contig1574:3492, Contig2724:104696, Contig2724:104611, Contig2724:104597, Contig2724:104574, Contig2724:63576, Contig2724:63549, Contig5950:310104, Contig5950:306795, Contig5950:306721, Contig5950:103401, Contig5950:103341, Contig8956:47334, Contig8956:47408, Contig8956:157339, Contig8956:157340, Contig8956:177360, Contig8956:177398, Contig8956:237366, Contig8956:237386, Contig9166:93294, Contig9…
5B	27.076	6	1482, 2671, 2670, 2669, 2668, 2667	Contig1022:1199109, Contig1804:382525, Contig1803:1870470, Contig1803:1465537, Contig1803:1041685, Contig1803:930590
5B	33.5468	5	2666, 2665, 5362, 5361, 5360	Contig1803:421663, Contig1803:421634, Contig4738:179824, Contig4738:179713, Contig4738:76051
5B	38.3841	7	5359, 1742, 6892, 6891, 2940, 2939, 2938	Contig4738:62054, Contig1194:747084, Contig8670:430568, Contig8670:233421, Contig2031:357544, Contig2031:357429, Contig2030:333958
5B	53.1154	17	3408, 6054, 6053, 6052, 6051, 6050, 4885, 4884, 4883, 4882, 4881, 4880, 4879, 1281, 1282, 1283, 1284	Contig2419:823499, Contig5964:142620, Contig5964:142608, Contig5964:142601, Contig5964:87264, Contig5964:29507, Contig4086:457156, Contig4086:428542, Contig4086:413625, Contig4086:397311, Contig4086:342410, Contig4086:342378, Contig4086:223317, Contig877:3277, Contig877:121779, Contig877:121814, Contig877:482774
5B	55.6397	35	3210, 3209, 3208, 6792, 6791, 6790, 6789, 6788, 4837, 4838, 5299, 5298, 5297, 5296, 5295, 5294, 5292, 7361, 7360, 7359, 7358, 7357, 7355, 3363, 3684, 5684, 5767, 2765, 6350, 6351, 6352, 4639, 4641, 4642, 4643	Contig2257:271479, Contig2257:109122, Contig2257:109059, Contig8133:401396, Contig8133:367547, Contig8133:367538, Contig8133:292005, Contig8133:292003, Contig3977:129832, Contig3977:241790, Contig4632:193355, Contig4632:193354, Contig4632:193353, Contig4632:193336, Contig4632:193273, Contig4632:193220, Contig4632:32605, Contig11130:166474, Contig11130:119421, Contig11130:119346, Contig11130:39833…
6A	0	29	761, 760, 758, 757, 756, 755, 2129, 2130, 2131, 2132, 2133, 2134, 2135, 2136, 1800, 1801, 2556, 2557, 2558, 6857, 6856, 6258, 2753, 2754, 2756, 2757, 2758, 2759, 2760	Contig542:322075, Contig542:322062, Contig542:195813, Contig542:52709, Contig542:52653, Contig542:52629, Contig1432:44561, Contig1432:52650, Contig1432:104817, Contig1432:167729, Contig1432:167788, Contig1432:326115, Contig1432:326135, Contig1432:326176, Contig1223:35912, Contig1223:36015, Contig1720:1214, Contig1720:5480, Contig1720:45878, Contig8506:22722, Contig8506:22619, Contig6469:86205, Co…
6A	12.5292	12	4619, 4618, 906, 905, 3782, 3783, 3784, 2974, 2975, 3398, 3397, 1882	Contig3677:225068, Contig3677:80560, Contig634:103581, Contig634:24315, Contig2846:65345, Contig2846:367222, Contig2846:500179, Contig2060:32636, Contig2061:365051, Contig2410:771809, Contig2410:106877, Contig1275:62055
6A	23.073	4	1946, 7370, 7369, 1615	Contig1315:211935, Contig11225:25357, Contig11225:25356, Contig1129:206653
6A	25.164	40	4633, 4634, 5895, 7215, 6753, 6754, 6755, 6756, 5396, 3439, 3438, 3437, 6844, 6843, 7148, 7039, 7040, 7041, 7042, 3148, 3147, 3146, 3145, 3144, 3143, 1124, 2560, 2561, 2562, 2563, 6165, 6164, 6163, 6162, 6525, 6526, 825, 826, 827, 3381	Contig3704:377014, Contig3704:377032, Contig5733:47716, Contig10160:38508, Contig7970:22501, Contig7970:22539, Contig7970:88988, Contig7970:89104, Contig4794:60050, Contig2428:26186, Contig2428:26146, Contig2428:26133, Contig8363:33130, Contig8363:33021, Contig9945:110626, Contig9285:41784, Contig9285:64854, Contig9285:64874, Contig9285:150038, Contig2204:42641, Contig2204:42628, Contig2204:42625…
6A	34.546	2	4934, 4935	Contig4152:91052, Contig4152:91072
6A	40.7816	16	6820, 3551, 3550, 2813, 6212, 5144, 5145, 5146, 5147, 2983, 2982, 582, 583, 584, 585, 2463	Contig8245:118960, Contig2574:61136, Contig2574:61122, Contig1903:73311, Contig6344:12628, Contig4455:235687, Contig4455:240512, Contig4455:240585, Contig4455:240632, Contig2067:1192692, Contig2067:501902, Contig416:472503, Contig416:472520, Contig416:472659, Contig416:480668, Contig1644:776202
6A	43.9914	5	2462, 2067, 2063, 2064, 2065	Contig1644:726049, Contig1394:207335, Contig1393:258790, Contig1393:258805, Contig1393:452760
6A	59.196	3	5531, 5530, 5529	Contig4922:257922, Contig4922:257917, Contig4922:169289
6A	63.16	1	4506	Contig3541:62056
6A	74.5295	10	1904, 1905, 1906, 1710, 1709, 1708, 1707, 1706, 1704, 1033	Contig1286:326847, Contig1286:457062, Contig1286:688631, Contig1171:784815, Contig1171:710944, Contig1171:581436, Contig1171:448161, Contig1171:437316, Contig1171:212309, Contig703:64928
6A	92.6783	9	6829, 6830, 6831, 6832, 3282, 3281, 3280, 3279, 3246	Contig8297:29699, Contig8297:29710, Contig8297:29751, Contig8297:29757, Contig2311:409094, Contig2311:382200, Contig2311:382117, Contig2311:223476, Contig2274:178894
6B	1.99252	25	6386, 6385, 7063, 7064, 6684, 6683, 2444, 5926, 2834, 4462, 4463, 4464, 6864, 1960, 1961, 1962, 1963, 6465, 6464, 6463, 6462, 6461, 6460, 6459, 6458	Contig6797:215279, Contig6797:214473, Contig9342:15230, Contig9342:15239, Contig7682:96798, Contig7682:92039, Contig1626:19618, Contig5759:43528, Contig1913:348233, Contig3452:97668, Contig3452:99883, Contig3452:100010, Contig8541:199548, Contig1322:381077, Contig1322:807317, Contig1322:1034942, Contig1322:1080585, Contig6953:23966, Contig6953:23953, Contig6953:23952, Contig6953:23927, Contig6953…
6B	9.285	4	1142, 1141, 1140, 1139	Contig810:1713776, Contig810:893648, Contig810:619780, Contig810:619669
6B	19.685	8	1138, 1137, 1136, 1135, 1134, 1133, 1132, 1131	Contig810:217462, Contig810:217460, Contig810:203163, Contig810:94579, Contig810:58048, Contig810:57956, Contig810:9182, Contig810:9138
6B	27.4453	9	1982, 4485, 4486, 4487, 4488, 4489, 4490, 4553, 4554	Contig1352:856292, Contig3517:901549, Contig3517:968015, Contig3517:1193450, Contig3517:1308637, Contig3517:1308658, Contig3517:1361421, Contig3577:44311, Contig3577:175191
6B	38.1217	12	1791, 1790, 1789, 1788, 1787, 1786, 2282, 2283, 2284, 2285, 2333, 2332	Contig1211:1133840, Contig1211:927003, Contig1211:926908, Contig1211:657634, Contig1211:385059, Contig1211:153466, Contig1506:310443, Contig1506:802906, Contig1506:802933, Contig1506:956131, Contig1531:2606130, Contig1531:1335332
6B	45.6394	23	2331, 2330, 2329, 2327, 2326, 679, 680, 1907, 409, 6707, 1540, 1541, 1542, 4022, 681, 682, 683, 684, 685, 686, 1987, 1986, 3521	Contig1531:1321469, Contig1531:1321454, Contig1531:1162046, Contig1531:277405, Contig1531:259800, Contig497:201284, Contig497:441086, Contig1287:27323, Contig281:765112, Contig7778:56073, Contig1083:54515, Contig1083:129850, Contig1083:129951, Contig3080:187657, Contig498:429551, Contig498:429605, Contig498:621632, Contig498:621756, Contig498:621772, Contig498:621776, Contig1357:226936, Contig135…
7A	1.13438	13	5883, 5882, 6967, 5035, 5036, 4686, 4685, 6917, 6916, 6915, 6914, 2190, 2191	Contig5710:586073, Contig5710:474081, Contig9061:58189, Contig4332:607391, Contig4332:1078225, Contig3779:778984, Contig3779:778853, Contig8809:476046, Contig8809:152671, Contig8809:152624, Contig8809:114913, Contig1470:69308, Contig1470:621725
7A	10.0688	5	2192, 2193, 2194, 2195, 2196	Contig1470:1357002, Contig1470:1451046, Contig1470:1485112, Contig1470:1485140, Contig1470:1580291
7A	14.442	7	2198, 2199, 2202, 2322, 2323, 6376, 6375	Contig1470:2114250, Contig1470:2156716, Contig1470:2292505, Contig1518:544672, Contig1518:544754, Contig6737:754246, Contig6737:754173
7A	47.117	12	6372, 3896, 3895, 3894, 3897, 5088, 4552, 4551, 4550, 4549, 4548, 4547	Contig6737:132619, Contig2950:713454, Contig2950:180495, Contig2950:156909, Contig2951:245261, Contig4402:345453, Contig3575:556694, Contig3575:111856, Contig3575:111764, Contig3575:34779, Contig3575:34759, Contig3575:34718
7A	54.473	7	4865, 4866, 4867, 6606, 6607, 2458, 1391	Contig4048:667906, Contig4048:875782, Contig4048:875791, Contig7434:373065, Contig7434:373178, Contig1633:431775, Contig979:298021
7A	62.9314	11	1395, 1394, 1393, 1392, 279, 252, 251, 250, 249, 4907, 4908	Contig980:584033, Contig980:543003, Contig980:542988, Contig980:132008, Contig177:229014, Contig149:255909, Contig149:255838, Contig149:239260, Contig149:36711, Contig4105:389036, Contig4105:389045
7A	70.5038	17	4909, 4910, 7572, 4927, 4926, 382, 383, 384, 385, 386, 387, 388, 389, 390, 391, 392, 393	Contig4105:389068, Contig4105:789690, Contig13449:10565, Contig4130:88820, Contig4130:88719, Contig274:468861, Contig274:683123, Contig274:889992, Contig274:890041, Contig274:890134, Contig274:1105353, Contig274:1484761, Contig274:1484831, Contig274:1717021, Contig274:1717077, Contig274:1753360, Contig274:1753409
7A	75.3666	5	1752, 1751, 1749, 1748, 1747	Contig1199:1288857, Contig1199:1288739, Contig1199:549113, Contig1199:310478, Contig1199:310329
7A	80.035	1	1348	Contig956:607765
7A	84.884	1	1147	Contig813:25846
7A	91.6018	5	1143, 1144, 1145, 1146, 2726	Contig812:642404, Contig812:642470, Contig812:799399, Contig812:1293831, Contig1842:435502
7A	99.0324	7	4335, 4334, 4332, 4330, 2594, 6154, 6155	Contig3301:1030671, Contig3301:1030604, Contig3301:383012, Contig3301:106889, Contig1769:338517, Contig6192:163625, Contig6192:163681
7B	1.75182	11	1764, 6519, 4432, 4433, 5340, 5341, 3625, 3626, 2814, 4336, 898	Contig1205:51423, Contig7096:36525, Contig3423:44722, Contig3423:192079, Contig4690:58352, Contig4690:58451, Contig2645:408896, Contig2645:408952, Contig1906:170399, Contig3302:38748, Contig620:421954
7B	9.313	3	899, 900, 901	Contig621:400985, Contig621:401012, Contig621:401045
7B	14.435	3	225, 224, 2862	Contig130:1667960, Contig130:1667923, Contig1935:3098
7B	22.5717	9	2863, 1870, 376, 375, 5330, 5329, 5328, 5327, 5326	Contig1935:659342, Contig1265:409, Contig269:223449, Contig269:223403, Contig4671:2261338, Contig4671:1848635, Contig4671:1848611, Contig4671:1696218, Contig4671:1695112
7B	26.6137	6	5325, 5324, 4946, 6720, 3057, 3058	Contig4671:422947, Contig4671:18874, Contig4172:377314, Contig7822:101817, Contig2130:703922, Contig2130:703937
7B	45.0329	22	3059, 3060, 3061, 3923, 3922, 3920, 3064, 4166, 4167, 4168, 4169, 6795, 6391, 3120, 3119, 621, 2915, 903, 902, 2639, 2638, 2637	Contig2130:980786, Contig2130:1250017, Contig2130:1589032, Contig2976:599691, Contig2976:599682, Contig2976:221151, Contig2131:155687, Contig3138:22275, Contig3138:24885, Contig3138:24932, Contig3138:76377, Contig8154:305856, Contig6804:165529, Contig2170:172503, Contig2170:125276, Contig431:44420, Contig2006:235298, Contig622:1238448, Contig622:1238417, Contig1787:661157, Contig1787:330459, Cont…
7B	51.6991	16	2636, 2635, 2634, 5655, 5649, 5648, 5363, 3448, 3449, 3450, 3451, 3452, 3453, 3454, 3455, 3456	Contig1787:57303, Contig1787:57291, Contig1787:28131, Contig5157:392702, Contig5122:156757, Contig5122:22674, Contig4739:183245, Contig2442:3592, Contig2442:136968, Contig2442:576461, Contig2442:798429, Contig2442:877913, Contig2442:877948, Contig2442:895102, Contig2442:980239, Contig2442:982479
7B	54.2193	4	3462, 3463, 3464, 3465	Contig2442:1199464, Contig2442:1199490, Contig2442:1199494, Contig2442:1423025
7B	75.9713	11	954, 955, 956, 957, 958, 2873, 2872, 2871, 5175, 5176, 5177	Contig659:566634, Contig659:927875, Contig659:1001821, Contig659:1001835, Contig659:1009074, Contig1938:229019, Contig1938:228951, Contig1938:59664, Contig4512:116920, Contig4512:300896, Contig4512:433714
7B	81.0676	5	5178, 5179, 5180, 1539, 1538	Contig4512:436581, Contig4512:436629, Contig4512:510760, Contig1081:239925, Contig1081:239893
7B	85.7399	25	1537, 1536, 1535, 1534, 1533, 1532, 886, 2527, 2526, 2525, 2524, 2523, 2522, 2521, 2520, 2519, 2518, 2517, 2516, 2515, 2514, 2513, 2528, 2529, 2530	Contig1081:174139, Contig1081:107271, Contig1081:107254, Contig1081:107137, Contig1081:31017, Contig1081:31011, Contig615:94383, Contig1707:660009, Contig1707:659968, Contig1707:624132, Contig1707:312573, Contig1707:312533, Contig1707:279745, Contig1707:241461, Contig1707:241449, Contig1707:240502, Contig1707:240396, Contig1707:127172, Contig1707:127150, Contig1707:127136, Contig1707:127134, Cont…
7B	93.0113	30	2532, 2533, 2534, 2535, 2536, 2537, 2538, 1529, 1528, 1527, 1526, 1525, 1524, 1523, 1522, 1521, 1520, 1519, 1518, 1517, 1516, 5859, 824, 823, 822, 4871, 4870, 6694, 7034, 7033	Contig1708:420708, Contig1708:500932, Contig1708:501031, Contig1708:516909, Contig1708:526939, Contig1708:526973, Contig1708:526983, Contig1078:886863, Contig1078:859966, Contig1078:859958, Contig1078:389746, Contig1078:281516, Contig1078:246568, Contig1078:220685, Contig1078:197313, Contig1078:197219, Contig1078:197162, Contig1078:197158, Contig1078:107973, Contig1078:107958, Contig1078:67407, C…
8A	1.25913	37	7544, 3037, 3038, 3039, 3040, 3041, 3042, 3043, 3044, 3045, 6363, 6362, 6361, 6026, 6027, 6028, 6029, 6030, 6031, 3755, 3756, 3753, 3752, 3751, 466, 467, 468, 469, 470, 471, 472, 473, 4983, 3252, 3251, 4294, 4295	Contig13117:31272, Contig2124:685181, Contig2124:695966, Contig2124:695976, Contig2124:696054, Contig2124:696059, Contig2125:38847, Contig2125:43445, Contig2125:43518, Contig2125:43540, Contig6679:116524, Contig6679:116465, Contig6679:116419, Contig5915:68365, Contig5916:157000, Contig5916:157079, Contig5916:157091, Contig5916:223303, Contig5916:223420, Contig2795:218695, Contig2795:301002, Conti…
8A	9.73429	28	4296, 4297, 2320, 2319, 2318, 2317, 2315, 2314, 2313, 2312, 2311, 2310, 2309, 2308, 2307, 2306, 2305, 2304, 897, 896, 895, 894, 893, 892, 890, 889, 888, 887	Contig3277:815614, Contig3277:978880, Contig1514:698563, Contig1514:683865, Contig1514:666701, Contig1514:542681, Contig1514:482370, Contig1514:482362, Contig1514:351918, Contig1514:301873, Contig1514:273930, Contig1514:273905, Contig1514:215732, Contig1514:129624, Contig1514:129606, Contig1514:129603, Contig1514:108991, Contig1514:49966, Contig618:1249978, Contig618:1130784, Contig618:1130773, C…
8A	16.0794	40	4800, 4801, 4802, 4803, 4804, 4811, 4810, 4809, 4808, 4806, 4805, 5887, 3264, 3263, 124, 123, 7478, 3609, 3608, 3607, 3606, 3605, 3604, 3603, 3602, 3601, 3600, 3599, 3598, 3597, 5944, 5945, 5181, 5182, 5183, 5184, 5185, 5186, 5187, 5188	Contig3924:31336, Contig3924:146124, Contig3924:160728, Contig3924:189475, Contig3924:255598, Contig3925:494797, Contig3925:319538, Contig3925:255724, Contig3925:125836, Contig3925:18192, Contig3925:18160, Contig5712:95472, Contig2297:58438, Contig2297:7456, Contig95:146725, Contig95:34870, Contig12279:119731, Contig2636:506514, Contig2636:506398, Contig2636:461061, Contig2636:396446, Contig2636:…
8A	21.6421	15	5189, 5190, 5191, 5192, 5193, 5775, 5776, 5777, 5778, 5779, 5780, 5781, 6933, 6932, 6931	Contig4515:415837, Contig4515:559503, Contig4515:624347, Contig4515:624348, Contig4515:902184, Contig5426:86148, Contig5426:93750, Contig5426:196290, Contig5426:196306, Contig5426:196307, Contig5426:231926, Contig5426:373766, Contig8867:97377, Contig8867:97284, Contig8867:74104
8A	26.9855	20	1451, 1452, 1453, 1454, 1455, 1456, 1457, 1458, 5517, 5516, 5515, 5514, 5513, 5512, 7490, 7489, 7488, 7487, 7486, 7485	Contig1010:2516, Contig1010:2562, Contig1010:151215, Contig1010:217558, Contig1010:217559, Contig1010:878361, Contig1010:892273, Contig1010:892392, Contig4896:224185, Contig4896:110469, Contig4896:92620, Contig4896:10009, Contig4896:9968, Contig4896:9877, Contig12329:111202, Contig12329:108469, Contig12329:108374, Contig12329:89207, Contig12329:89193, Contig12329:89063
8A	34.0025	126	5000, 5001, 5002, 5003, 5004, 5005, 5006, 5007, 5008, 6649, 6650, 6651, 6652, 6887, 6886, 450, 451, 452, 453, 454, 455, 456, 459, 460, 462, 463, 464, 465, 447, 446, 445, 444, 443, 442, 440, 3140, 3137, 3136, 3135, 3134, 3132, 3131, 3130, 5785, 5786, 5787, 5788, 5789, 5790, 4760, 4759, 4758, 4756, 6252, 6251, 6250, 6249, 6247, 6248, 6380, 6381, 6382, 6383, 6384, 3377, 3376, 3375, 3374, 3373, 3372,…	Contig4257:198602, Contig4257:205201, Contig4257:240039, Contig4257:240055, Contig4257:240192, Contig4257:272955, Contig4257:344409, Contig4257:344418, Contig4257:344540, Contig7567:133795, Contig7567:133815, Contig7567:180947, Contig7567:184442, Contig8627:14045, Contig8627:13300, Contig298:23387, Contig298:60411, Contig298:91520, Contig298:248837, Contig298:249480, Contig298:249524, Contig298:2…
8A	38.7676	19	4963, 4962, 4961, 4960, 4959, 2363, 2362, 2360, 6220, 6221, 6222, 5089, 4780, 4779, 4778, 4777, 4776, 1765, 1766	Contig4200:126452, Contig4200:106303, Contig4200:106301, Contig4200:106240, Contig4200:68259, Contig1560:143498, Contig1560:143483, Contig1560:8783, Contig6368:210667, Contig6368:210706, Contig6368:210727, Contig4415:7675, Contig3875:170698, Contig3875:170691, Contig3875:170683, Contig3875:170663, Contig3875:84200, Contig1208:244379, Contig1208:292875
8A	45.0216	44	1767, 1768, 1785, 1784, 1783, 1782, 1781, 1780, 1779, 1778, 1777, 1776, 1775, 1774, 1773, 1772, 1771, 1770, 1769, 870, 869, 868, 867, 6848, 6849, 5975, 5976, 6323, 6324, 5401, 5402, 5403, 5404, 5405, 5406, 7449, 7448, 7447, 3162, 3163, 3164, 3165, 1288, 1289	Contig1208:344440, Contig1208:505414, Contig1209:463408, Contig1209:416124, Contig1209:416083, Contig1209:416014, Contig1209:342090, Contig1209:341940, Contig1209:156016, Contig1209:156005, Contig1209:140218, Contig1209:137683, Contig1209:137537, Contig1209:137527, Contig1209:80814, Contig1209:80802, Contig1209:80800, Contig1209:80792, Contig1209:80770, Contig608:96190, Contig608:92142, Contig608…
8B	1.57995	19	3578, 5087, 6614, 6613, 6612, 6611, 6610, 4480, 7106, 7105, 1881, 1880, 1879, 3166, 3167, 2968, 2967, 2966, 4355	Contig2611:366151, Contig4396:56478, Contig7441:114664, Contig7441:114655, Contig7441:114651, Contig7441:114649, Contig7441:114635, Contig3492:166956, Contig9681:44776, Contig9681:44743, Contig1269:139602, Contig1269:49876, Contig1269:49803, Contig2240:293236, Contig2240:293356, Contig2055:327817, Contig2055:327813, Contig2055:327809, Contig3332:239386
8B	8.87037	8	4356, 4357, 3701, 3700, 3699, 3698, 358, 359	Contig3332:239469, Contig3332:399140, Contig2730:1163710, Contig2730:1001392, Contig2730:1001346, Contig2730:258557, Contig264:182077, Contig264:399418
8B	25.4508	13	361, 362, 363, 364, 365, 366, 367, 368, 369, 4235, 4234, 4233, 4232	Contig264:817059, Contig264:841685, Contig264:852503, Contig264:925116, Contig265:811199, Contig265:811290, Contig265:880225, Contig265:956807, Contig265:956823, Contig3200:617426, Contig3200:516695, Contig3200:355601, Contig3200:238057
8B	30.7807	12	6022, 6023, 6024, 6025, 5390, 5391, 5392, 4928, 3071, 3070, 253, 254	Contig5912:995202, Contig5912:1008026, Contig5912:1008079, Contig5912:1008080, Contig4781:10288, Contig4781:10289, Contig4781:144829, Contig4136:415291, Contig2144:549628, Contig2144:491633, Contig150:22422, Contig150:165112
8B	63.4518	26	6510, 516, 515, 514, 1543, 1544, 1226, 1225, 434, 435, 436, 1734, 1733, 6859, 6858, 6358, 6357, 6356, 6355, 6354, 5086, 4856, 370, 3945, 3947, 3948	Contig7072:80859, Contig369:202808, Contig369:202775, Contig369:202771, Contig1085:41570, Contig1085:76416, Contig862:132177, Contig862:132169, Contig291:369242, Contig291:393999, Contig291:394026, Contig1188:778027, Contig1188:777954, Contig8522:84714, Contig8522:84689, Contig6634:1071768, Contig6634:215155, Contig6634:215142, Contig6634:215138, Contig6634:203496, Contig4381:550149, Contig4021:3…
10A	0	11	977, 976, 975, 974, 973, 5873, 5872, 5871, 5870, 5869, 5868	Contig666:704367, Contig666:704340, Contig666:70516, Contig666:70514, Contig666:41525, Contig5683:558919, Contig5683:410570, Contig5683:398542, Contig5683:398399, Contig5683:314245, Contig5683:314177
10A	13.8852	9	6719, 6717, 6718, 2465, 6101, 6102, 3076, 3077, 1042	Contig7818:6407, Contig7817:212073, Contig7817:212074, Contig1647:36203, Contig6111:129278, Contig6111:129311, Contig2147:96962, Contig2147:177132, Contig707:364451
10A	22.5984	5	1644, 1643, 1642, 1641, 545	Contig1141:211492, Contig1141:211488, Contig1141:211384, Contig1141:14887, Contig382:50619
10A	25.2383	7	546, 547, 548, 549, 550, 5366, 5367	Contig382:320707, Contig382:507166, Contig382:653949, Contig382:654063, Contig382:720572, Contig4747:270022, Contig4747:270035
10A	37.3969	29	1369, 1370, 1371, 1372, 1373, 1374, 1015, 1014, 7382, 7381, 7380, 7379, 7458, 7457, 5795, 5796, 5797, 5798, 5799, 5800, 4868, 7481, 7482, 7483, 127, 3478, 3479, 3480, 3481	Contig977:48259, Contig977:69703, Contig977:195602, Contig977:195648, Contig977:344011, Contig977:344012, Contig688:509998, Contig688:206373, Contig11326:31658, Contig11326:31650, Contig11326:23481, Contig11326:23421, Contig12033:29686, Contig12033:29682, Contig5450:44179, Contig5450:44210, Contig5450:44250, Contig5450:115946, Contig5450:133871, Contig5450:176497, Contig4049:406820, Contig12316:5…
10A	42.477	4	3289, 3290, 3291, 4933	Contig2318:181340, Contig2318:181410, Contig2318:194876, Contig4149:267089
10A	50.5643	72	274, 2250, 2251, 2252, 6706, 6705, 3396, 3395, 794, 793, 5348, 1485, 1484, 1483, 6625, 4391, 4390, 4389, 4388, 4387, 6867, 6866, 6865, 820, 819, 817, 816, 815, 814, 3544, 3543, 3542, 3541, 3540, 2293, 2289, 2288, 2287, 2286, 5713, 5712, 5711, 282, 1847, 1846, 1845, 698, 697, 695, 4399, 4949, 4948, 4947, 626, 625, 6812, 6813, 6888, 5337, 6467, 6468, 5747, 5639, 5640, 5641, 5642, 726, 725, 724, 627…	Contig166:36051, Contig1483:318349, Contig1483:407901, Contig1483:409218, Contig7769:38148, Contig7769:1525, Contig2409:454963, Contig2409:359432, Contig553:549544, Contig553:464418, Contig4701:220308, Contig1023:251879, Contig1023:250604, Contig1023:8878, Contig7511:423048, Contig3367:144027, Contig3367:143909, Contig3367:99404, Contig3367:99341, Contig3367:96976, Contig8545:28306, Contig8545:28…
10B	0.79913	23	3168, 437, 438, 7170, 7169, 7168, 2629, 2630, 2631, 2632, 6540, 6541, 6542, 7212, 7211, 7210, 7209, 5750, 5749, 5748, 275, 2933, 2932	Contig2241:24204, Contig292:98756, Contig292:98757, Contig9997:129692, Contig9997:129673, Contig9997:125387, Contig1780:119316, Contig1780:119332, Contig1780:173005, Contig1780:173010, Contig7188:304280, Contig7188:304338, Contig7188:304361, Contig10157:72343, Contig10157:51106, Contig10157:51005, Contig10157:51004, Contig5351:79665, Contig5351:79664, Contig5351:58052, Contig167:45561, Contig2024…
10B	8.99	4	2931, 2930, 2929, 6295	Contig2024:26895, Contig2024:26875, Contig2024:26821, Contig6546:59129
10B	19.7287	25	6296, 6297, 6298, 6299, 6300, 6301, 6302, 6303, 6304, 6305, 5400, 5399, 5398, 5397, 7455, 7456, 4775, 4774, 3522, 3523, 3524, 3525, 6228, 139, 138	Contig6546:141033, Contig6546:141035, Contig6546:141066, Contig6546:141078, Contig6546:141130, Contig6546:339467, Contig6546:357990, Contig6546:521384, Contig6546:586641, Contig6546:607495, Contig4799:77205, Contig4799:77101, Contig4799:77057, Contig4799:13355, Contig12017:12841, Contig12017:30970, Contig3872:126319, Contig3872:126304, Contig2515:18653, Contig2515:44447, Contig2515:44571, Contig2…
10B	25.46	2	6656, 6655	Contig7582:10839, Contig7582:10672
10B	33.911	5	5056, 2343, 7262, 7142, 5817	Contig4356:150670, Contig1552:214809, Contig10430:15064, Contig9902:38912, Contig5518:435169
10B	37.417	1	5718	Contig5316:254403
10B	57.3481	12	5616, 3081, 3080, 3079, 4019, 4018, 4017, 571, 570, 4744, 3859, 5819	Contig5069:79143, Contig2151:1229652, Contig2151:1229544, Contig2151:233192, Contig3074:89154, Contig3074:89124, Contig3074:89094, Contig405:230120, Contig405:230068, Contig3845:15017, Contig2890:336241, Contig5538:56617
10B	60.44	1	6648	Contig7556:53295
11A	0.333818	33	7673, 7672, 7413, 3532, 7403, 3160, 3161, 3681, 4679, 6735, 6734, 5653, 5652, 5651, 1123, 1122, 1121, 5291, 5290, 5289, 5288, 6435, 6436, 485, 7484, 7623, 7624, 7625, 7626, 7627, 5052, 7523, 7522	Contig15970:4337, Contig15970:4215, Contig11589:39883, Contig2521:3291, Contig11476:32788, Contig2237:21692, Contig2237:154487, Contig2707:38976, Contig3769:91041, Contig7859:14711, Contig7859:14682, Contig5126:4767, Contig5126:4762, Contig5126:4761, Contig768:71594, Contig768:8535, Contig768:8487, Contig4627:408661, Contig4627:365511, Contig4627:365484, Contig4627:365420, Contig6923:85243, Conti…
11A	14.035	8	5525, 4375, 4376, 4377, 6816, 6817, 5879, 2708	Contig4914:113743, Contig3344:106323, Contig3344:119928, Contig3344:379163, Contig8229:58670, Contig8229:163157, Contig5698:22506, Contig1824:274966
11A	20.792	1	6055	Contig5976:246853
11A	26.071	8	2580, 2581, 2582, 2583, 4165, 4164, 3535, 624	Contig1742:476332, Contig1742:476339, Contig1742:476384, Contig1742:524112, Contig3134:19579, Contig3134:19572, Contig2528:257852, Contig441:201926
11A	51.5224	15	623, 7307, 334, 335, 336, 337, 7562, 7561, 7560, 6938, 5587, 2262, 2261, 6570, 6569	Contig441:80563, Contig10802:11159, Contig248:11649, Contig248:29406, Contig248:303061, Contig248:303081, Contig13292:4437, Contig13292:4341, Contig13292:4338, Contig8927:42629, Contig5010:37776, Contig1488:76945, Contig1488:72623, Contig7286:52740, Contig7286:52735
11B	1.33435	85	7154, 7155, 7156, 5429, 5430, 5431, 5432, 5433, 5434, 5435, 5436, 5437, 7046, 7047, 3627, 3628, 3629, 3630, 5891, 7107, 5462, 5461, 5460, 5459, 5458, 5457, 5456, 5455, 5454, 5453, 5452, 5451, 5450, 5449, 5448, 3826, 4668, 7302, 7301, 7299, 7298, 7297, 7584, 4289, 4288, 5584, 5583, 7193, 7192, 7191, 5764, 6360, 4680, 1964, 1113, 1114, 1115, 4514, 4515, 4516, 4517, 4518, 4519, 6444, 6443, 6442, 644…	Contig9962:40018, Contig9962:88994, Contig9962:88995, Contig4826:46962, Contig4826:57732, Contig4826:167088, Contig4826:226862, Contig4826:259375, Contig4826:259517, Contig4826:324411, Contig4826:324475, Contig4826:329302, Contig9303:77566, Contig9303:77586, Contig2649:115742, Contig2649:176240, Contig2649:253689, Contig2649:253795, Contig5717:35000, Contig9690:105150, Contig4845:243211, Contig48…
11B	9.04185	20	1002, 1005, 1006, 1007, 1008, 1009, 1010, 1011, 4706, 4707, 4708, 4709, 4710, 4711, 4715, 4716, 599, 600, 601, 602	Contig668:1218386, Contig668:1667716, Contig668:1667733, Contig668:1667740, Contig668:1723042, Contig668:1723077, Contig668:1846804, Contig668:1857111, Contig3828:134453, Contig3828:340427, Contig3828:367017, Contig3828:368176, Contig3828:368178, Contig3828:475944, Contig3828:626901, Contig3828:626906, Contig419:109121, Contig419:118703, Contig419:118747, Contig419:442829
11B	15.0768	21	6561, 4626, 4625, 4624, 4621, 7279, 7497, 7498, 7499, 5803, 5802, 2584, 4681, 4314, 4313, 4312, 6349, 1799, 1798, 1797, 4890	Contig7239:11122, Contig3685:238376, Contig3685:238367, Contig3685:238351, Contig3685:123759, Contig10592:37897, Contig12413:17786, Contig12413:17790, Contig12413:26187, Contig5504:53575, Contig5504:53535, Contig1743:318967, Contig3775:224584, Contig3290:13366, Contig3290:13315, Contig3290:13240, Contig6614:55965, Contig1222:279642, Contig1222:208059, Contig1222:207997, Contig4092:78405
11B	20.1032	17	5689, 5688, 5687, 5686, 2379, 2375, 2374, 2373, 4975, 4977, 7141, 7140, 6739, 7239, 3928, 3929, 2258	Contig5275:30124, Contig5275:30112, Contig5275:30098, Contig5275:30087, Contig1572:437357, Contig1572:395339, Contig1572:395230, Contig1572:375257, Contig4220:19138, Contig4220:174329, Contig9894:51787, Contig9894:51746, Contig7885:10823, Contig10266:60281, Contig3002:81840, Contig3002:81859, Contig1487:366205
11B	26.1338	5	2260, 6708, 6709, 6710, 381	Contig1487:718017, Contig7780:25580, Contig7780:81854, Contig7780:128705, Contig272:19926
11B	34.5375	28	5313, 5312, 5311, 5310, 1569, 1570, 1571, 1572, 1573, 1574, 6153, 6152, 6151, 6150, 6149, 6148, 6147, 6146, 6145, 1327, 1326, 1325, 210, 211, 4892, 4893, 4894, 4899	Contig4644:301595, Contig4644:297973, Contig4644:54631, Contig4644:45572, Contig1097:31530, Contig1097:110971, Contig1097:319561, Contig1097:340665, Contig1097:386085, Contig1097:386181, Contig6190:272577, Contig6190:228741, Contig6190:228631, Contig6190:214304, Contig6190:183064, Contig6190:183002, Contig6190:96266, Contig6190:96251, Contig6190:96147, Contig918:147445, Contig918:105774, Contig91…
11B	40.7194	23	4434, 4435, 4436, 4437, 4438, 4439, 4440, 4441, 4442, 4443, 4444, 4445, 4448, 4449, 4054, 4053, 4052, 4051, 4786, 1184, 1185, 1186, 1187	Contig3424:99264, Contig3424:235070, Contig3424:323219, Contig3424:323221, Contig3424:323240, Contig3424:323264, Contig3424:485920, Contig3424:674031, Contig3424:674083, Contig3424:674096, Contig3424:674120, Contig3424:674146, Contig3424:969984, Contig3424:970038, Contig3098:44134, Contig3098:44088, Contig3098:44085, Contig3098:19335, Contig3886:98507, Contig829:239225, Contig829:239263, Contig82…
11B	46.0588	12	1188, 1189, 1190, 1191, 1192, 1193, 1194, 1195, 1196, 1346, 6176, 6177	Contig829:426378, Contig829:426430, Contig829:426462, Contig829:546399, Contig829:628812, Contig829:628813, Contig829:651323, Contig829:719426, Contig829:727194, Contig948:221106, Contig6227:13582, Contig6227:77086
11B	51.8949	16	6178, 6179, 6180, 6181, 6182, 4684, 4683, 4682, 6806, 1553, 1552, 4671, 4670, 6928, 6927, 6926	Contig6227:102767, Contig6227:102791, Contig6227:102799, Contig6227:102802, Contig6227:179608, Contig3776:55842, Contig3776:55822, Contig3776:27116, Contig8165:66995, Contig1089:76025, Contig1089:76009, Contig3750:141092, Contig3750:141076, Contig8836:32514, Contig8836:32376, Contig8836:32375
12A	0.966647	17	3530, 3531, 7079, 6839, 2592, 2591, 2590, 2589, 5254, 4914, 6289, 6288, 6287, 6581, 6580, 6579, 3562	Contig2520:38626, Contig2520:135316, Contig9484:54224, Contig8325:46101, Contig1758:1431192, Contig1758:1431117, Contig1758:1431049, Contig1758:671251, Contig4571:108846, Contig4109:86935, Contig6542:160091, Contig6542:2481, Contig6542:2449, Contig7312:366271, Contig7312:170976, Contig7312:170971, Contig2594:34736
12A	6.861	4	3560, 3561, 1981, 1980	Contig2593:90458, Contig2593:90557, Contig1351:767664, Contig1351:457283
12A	16.374	3	7086, 4919, 4920	Contig9575:23149, Contig4113:117170, Contig4113:117306
12A	23.3706	10	326, 328, 329, 2549, 2547, 2546, 1676, 1677, 1678, 1679	Contig241:645052, Contig241:794097, Contig241:899624, Contig1715:368974, Contig1715:287726, Contig1715:287698, Contig1159:249485, Contig1159:423836, Contig1159:468495, Contig1159:907232
12A	37.3555	2	1680, 1681	Contig1159:1261515, Contig1159:1508945
12A	43.2686	14	6513, 1903, 1901, 1898, 1897, 1896, 125, 126, 170, 2729, 2730, 2731, 2732, 2733	Contig7083:121484, Contig1285:495547, Contig1285:489820, Contig1285:256792, Contig1285:256770, Contig1285:124279, Contig99:132529, Contig99:605336, Contig119:420964, Contig1849:101466, Contig1849:140405, Contig1849:140489, Contig1849:736655, Contig1849:736667
12A	48.345	9	6066, 6067, 5171, 5172, 5173, 5174, 7519, 5765, 3046	Contig6033:196139, Contig6033:196144, Contig4507:52360, Contig4507:125176, Contig4507:362106, Contig4508:83343, Contig12660:11342, Contig5394:10693, Contig2126:414139
12A	55.0436	25	3808, 3807, 3806, 3805, 72, 73, 74, 75, 76, 77, 78, 79, 80, 81, 82, 83, 84, 85, 86, 919, 920, 921, 922, 923, 924	Contig2871:116329, Contig2871:4018, Contig2871:4008, Contig2871:3888, Contig74:522843, Contig74:522951, Contig74:522958, Contig74:650454, Contig74:710962, Contig74:710972, Contig74:711029, Contig74:711030, Contig74:711087, Contig74:711090, Contig74:995990, Contig74:998746, Contig74:998887, Contig74:1004967, Contig74:1005060, Contig647:238784, Contig647:238818, Contig647:238840, Contig647:294808, …
12B	0.401471	17	2505, 4913, 4912, 4911, 796, 3680, 2741, 2740, 2739, 694, 693, 692, 691, 690, 689, 688, 687	Contig1703:9187, Contig4106:501607, Contig4106:501600, Contig4106:501583, Contig557:125610, Contig2705:51251, Contig1855:193013, Contig1855:99779, Contig1855:89236, Contig500:164831, Contig500:164785, Contig500:164695, Contig499:164133, Contig499:164102, Contig499:77044, Contig499:77001, Contig499:76929
12B	17.5317	4	4470, 4471, 1562, 1563	Contig3474:1357662, Contig3474:1583515, Contig1095:75581, Contig1095:377474
12B	26.5402	6	1564, 1565, 3825, 3824, 6758, 5128	Contig1095:487807, Contig1095:487827, Contig2879:423771, Contig2879:423658, Contig7985:68903, Contig4436:94742
12B	30.99	3	5612, 1445, 1446	Contig5060:158894, Contig1007:10054, Contig1007:539398
12B	39.3193	3	1448, 930, 929	Contig1007:1891508, Contig652:625577, Contig652:186392
12B	43.7114	7	7113, 7114, 7115, 4469, 4382, 1200, 1199	Contig9708:27187, Contig9708:27188, Contig9708:27304, Contig3473:44617, Contig3360:330480, Contig834:1852824, Contig834:1702798
12B	51.7292	13	2734, 476, 478, 479, 498, 499, 500, 3404, 3405, 3406, 3407, 3403, 3402	Contig1851:25245, Contig346:553683, Contig346:631057, Contig346:692367, Contig361:34927, Contig361:230197, Contig361:373837, Contig2416:180484, Contig2416:180548, Contig2416:300549, Contig2416:300569, Contig2415:1324593, Contig2415:1324572
12B	61.493	3	5896, 5897, 5898	Contig5738:348857, Contig5738:348867, Contig5738:348916
12B	67.812	15	4152, 4151, 4150, 4149, 4148, 4147, 6721, 6722, 6723, 6724, 6725, 6726, 1178, 1179, 1180	Contig3129:248311, Contig3129:245014, Contig3129:244972, Contig3129:187102, Contig3129:141643, Contig3129:141609, Contig7833:283818, Contig7833:283857, Contig7833:283942, Contig7833:283964, Contig7833:417049, Contig7833:417154, Contig828:137432, Contig828:137471, Contig828:139991
12B	74.1913	6	1182, 1183, 5155, 5154, 6687, 1440	Contig828:611324, Contig828:656449, Contig4473:206969, Contig4473:206304, Contig7692:42846, Contig1003:962592
12B	86.947	6	3332, 3333, 3334, 3335, 3549, 7508	Contig2349:456646, Contig2349:456671, Contig2349:456731, Contig2349:503996, Contig2566:375329, Contig12595:47038
13A	1.62013	15	2471, 6876, 1330, 1329, 1328, 7258, 3507, 3508, 3509, 3510, 6366, 6760, 6761, 5630, 5631	Contig1661:50676, Contig8585:33395, Contig922:509393, Contig922:481795, Contig922:344227, Contig10394:60892, Contig2487:170831, Contig2487:170832, Contig2487:210554, Contig2487:210622, Contig6698:478782, Contig7995:169847, Contig7995:169860, Contig5077:201127, Contig5077:448668
13A	8.41667	6	63, 64, 1490, 1489, 1488, 1487	Contig48:771769, Contig48:771777, Contig1032:771031, Contig1032:771019, Contig1032:698230, Contig1032:200645
13A	20.069	5	2698, 2699, 2700, 6020, 6021	Contig1812:185948, Contig1814:67194, Contig1814:257799, Contig5909:194642, Contig5909:194772
13A	32.641	10	4704, 4703, 4702, 4701, 4700, 3352, 3351, 3350, 3349, 3348	Contig3812:199672, Contig3812:191395, Contig3812:191387, Contig3812:191366, Contig3812:114636, Contig2364:1882350, Contig2364:1851043, Contig2364:1850926, Contig2364:1833262, Contig2364:1804558
13A	38.7183	6	3347, 3346, 3345, 3344, 3885, 3884	Contig2364:469009, Contig2364:33836, Contig2364:33818, Contig2364:33698, Contig2938:300718, Contig2938:122876
13A	46.102	1	2652	Contig1796:446506
13A	50.7871	16	2338, 720, 721, 5124, 5123, 5122, 5119, 5118, 5117, 5116, 5115, 5114, 5113, 7581, 3635, 3634	Contig1543:157206, Contig509:31947, Contig509:262439, Contig4433:369218, Contig4433:345982, Contig4433:345969, Contig4433:182647, Contig4433:160352, Contig4433:160329, Contig4433:68804, Contig4433:68791, Contig4433:68785, Contig4433:68741, Contig13667:15574, Contig2653:333559, Contig2653:123116
13A	54.5776	42	5939, 5938, 5937, 5936, 5935, 2859, 2860, 2861, 7634, 7635, 3024, 3025, 1315, 1314, 1313, 1312, 1311, 1310, 1309, 1308, 1307, 1306, 1305, 1304, 1303, 4384, 4383, 6420, 6419, 6418, 7051, 7050, 7049, 7048, 1422, 1423, 1424, 1425, 1426, 1427, 1428, 6115	Contig5793:160879, Contig5793:157564, Contig5793:157555, Contig5793:157553, Contig5793:157550, Contig1922:5403, Contig1922:17351, Contig1922:17362, Contig14575:9009, Contig14575:9139, Contig2114:144044, Contig2114:144045, Contig916:893484, Contig916:853811, Contig916:845426, Contig916:751602, Contig916:735128, Contig916:735120, Contig916:735086, Contig916:617105, Contig916:617013, Contig916:57302…
13B	1.49215	13	6688, 1829, 1830, 356, 357, 1675, 598, 597, 596, 595, 594, 593, 592	Contig7694:15943, Contig1240:295887, Contig1240:295920, Contig255:26929, Contig255:27060, Contig1158:230186, Contig418:2536660, Contig418:1077125, Contig418:1077108, Contig418:1014560, Contig418:1014529, Contig418:1014522, Contig418:933637
13B	13.5433	6	591, 590, 589, 588, 587, 5894	Contig418:886852, Contig418:532385, Contig418:137815, Contig418:137782, Contig418:137734, Contig5720:310107
13B	29.522	12	5766, 7394, 5130, 2650, 2649, 2648, 7628, 776, 777, 778, 781, 782	Contig5396:9213, Contig11445:49414, Contig4441:117080, Contig1791:227487, Contig1791:227368, Contig1791:227338, Contig14431:11742, Contig551:148114, Contig551:332471, Contig551:356051, Contig551:502904, Contig551:530695
13B	38.3203	85	783, 784, 785, 786, 787, 788, 789, 790, 2990, 2991, 2992, 2993, 2994, 2995, 2996, 2997, 2998, 2999, 1507, 1506, 1505, 1504, 1503, 5807, 5808, 5809, 5810, 5811, 5812, 5813, 5814, 6885, 5300, 5301, 6160, 6161, 1988, 1989, 1990, 1991, 1992, 1993, 1996, 1997, 1998, 1999, 2000, 2001, 2002, 2003, 2004, 2005, 2006, 2007, 2008, 2009, 3788, 3789, 3790, 5416, 5415, 5414, 5413, 5412, 5411, 5410, 6855, 6531,…	Contig551:613681, Contig551:613696, Contig551:769843, Contig551:769883, Contig551:987343, Contig551:1097968, Contig551:1097978, Contig551:1109668, Contig2077:48707, Contig2077:48728, Contig2077:80852, Contig2077:100194, Contig2077:118787, Contig2077:118809, Contig2077:129533, Contig2077:142343, Contig2077:169768, Contig2077:169769, Contig1057:165688, Contig1057:163022, Contig1057:163010, Contig10…
13B	46.164	17	6131, 6132, 6133, 6134, 6135, 6136, 6137, 6138, 4572, 4571, 1152, 1151, 1150, 1149, 1148, 330, 4217	Contig6179:488588, Contig6179:498541, Contig6179:507153, Contig6179:507247, Contig6179:507261, Contig6179:766506, Contig6179:785614, Contig6179:800854, Contig3626:297368, Contig3626:153081, Contig814:341768, Contig814:195823, Contig814:153082, Contig814:56624, Contig814:56540, Contig244:111695, Contig3183:236380
13B	49.836	17	4216, 4215, 7331, 7332, 5916, 5917, 5918, 5919, 5920, 5921, 5922, 5923, 5924, 5968, 5967, 5966, 5965	Contig3183:236245, Contig3183:162402, Contig10984:9984, Contig10984:112881, Contig5755:96463, Contig5755:97704, Contig5755:110111, Contig5755:110126, Contig5755:134896, Contig5755:134938, Contig5755:134977, Contig5755:148429, Contig5755:337367, Contig5819:1083718, Contig5819:1083690, Contig5819:1083672, Contig5819:1041895
13B	54.4035	32	5964, 5963, 5959, 5958, 5957, 5956, 5955, 5954, 5953, 5952, 5951, 5950, 5949, 5948, 5947, 5946, 305, 304, 303, 301, 296, 293, 292, 291, 290, 289, 288, 287, 286, 1204, 1203, 1202	Contig5819:904403, Contig5819:887138, Contig5819:225512, Contig5819:218309, Contig5819:214844, Contig5819:214820, Contig5819:214760, Contig5819:41644, Contig5819:41585, Contig5819:25765, Contig5819:25713, Contig5819:25702, Contig5819:25651, Contig5819:21342, Contig5819:21331, Contig5819:21232, Contig221:1269954, Contig221:1269847, Contig221:1269835, Contig221:1015218, Contig221:626170, Contig221:…
13B	65.417	18	1201, 6605, 6604, 6603, 6602, 7251, 7252, 7254, 7255, 7256, 6736, 6737, 572, 573, 574, 575, 576, 577	Contig840:135957, Contig7432:70664, Contig7432:70656, Contig7432:70645, Contig7432:70639, Contig10391:15188, Contig10391:15189, Contig10391:63547, Contig10391:63600, Contig10391:124086, Contig7872:91321, Contig7872:91324, Contig408:115515, Contig408:202258, Contig408:297439, Contig408:297475, Contig408:446181, Contig408:503025
13B	67.2093	12	578, 579, 580, 581, 3881, 3880, 3879, 3878, 3877, 3876, 3875, 3874	Contig408:634321, Contig408:634346, Contig408:710061, Contig408:710137, Contig2929:594979, Contig2929:577313, Contig2929:538115, Contig2929:538104, Contig2929:538096, Contig2929:475263, Contig2929:475234, Contig2929:475119
13B	81.735	2	3394, 3391	Contig2408:993292, Contig2408:520117
13B	84.4526	7	3126, 3127, 3128, 3129, 6225, 5133, 5131	Contig2195:165669, Contig2195:211712, Contig2195:211792, Contig2195:211826, Contig6381:239984, Contig4442:470903, Contig4442:161104
13C	1.28609	22	2255, 2764, 2763, 2762, 1377, 1378, 1381, 1382, 1383, 1384, 1385, 1386, 1387, 1388, 1389, 1390, 3893, 3679, 1812, 1811, 1810, 1809	Contig1485:1390068, Contig1863:605932, Contig1863:419740, Contig1863:394491, Contig978:82444, Contig978:159667, Contig978:392565, Contig978:475251, Contig978:481599, Contig978:481622, Contig978:481655, Contig978:481660, Contig978:481691, Contig978:503463, Contig978:504482, Contig978:623631, Contig2947:107512, Contig2704:117766, Contig1229:796641, Contig1229:754920, Contig1229:706334, Contig1229:2…
13C	7.06787	8	3353, 3115, 3116, 3547, 3548, 6423, 6422, 6421	Contig2369:10772, Contig2163:61338, Contig2163:193174, Contig2556:168927, Contig2556:168971, Contig6887:6115, Contig6887:6092, Contig6887:6085
14A	1.47	16	5393, 2052, 2053, 2054, 2055, 2056, 2057, 2058, 2059, 7586, 7587, 7588, 6682, 7075, 6566, 4767	Contig4783:155485, Contig1382:280434, Contig1382:280541, Contig1382:346661, Contig1382:505025, Contig1382:659377, Contig1382:661896, Contig1382:906210, Contig1382:1186916, Contig13818:48897, Contig13818:64948, Contig13818:65075, Contig7679:86512, Contig9462:119457, Contig7273:8485, Contig3860:266255
14A	7.71222	23	3007, 6712, 5854, 5028, 1405, 1406, 1407, 1408, 1409, 1410, 5283, 5284, 5285, 5286, 5287, 2785, 2786, 2787, 2788, 2789, 2790, 2791, 4513	Contig2098:68642, Contig7793:40023, Contig5613:35819, Contig4322:54064, Contig988:53718, Contig988:53723, Contig988:219171, Contig988:369914, Contig988:580432, Contig988:580545, Contig4619:684702, Contig4619:684748, Contig4619:1003861, Contig4619:1003932, Contig4619:1016319, Contig1874:300248, Contig1874:354584, Contig1874:753151, Contig1874:778743, Contig1874:1027112, Contig1874:1027123, Contig1…
14A	13.5536	5	2485, 2484, 2483, 2482, 2481	Contig1666:2477388, Contig1666:2459780, Contig1666:2422881, Contig1666:2043500, Contig1666:476953
14A	22.8678	8	1286, 1287, 2864, 2865, 2866, 2867, 2868, 2869	Contig883:759881, Contig883:830285, Contig1936:211741, Contig1936:260922, Contig1936:633758, Contig1936:633897, Contig1936:1271350, Contig1936:1274600
14A	26.1028	6	2870, 3257, 3256, 3255, 3254, 3253	Contig1936:1307053, Contig2288:741966, Contig2288:741941, Contig2288:741928, Contig2288:628194, Contig2288:287939
14A	34.5031	8	1157, 1158, 1159, 1160, 1161, 3978, 3979, 394	Contig819:188362, Contig819:631553, Contig819:750079, Contig819:915281, Contig819:1450031, Contig3036:89811, Contig3036:120594, Contig276:268
14B	0.100455	11	1224, 1828, 6500, 4923, 4563, 4562, 5880, 5782, 5783, 5784, 1727	Contig857:102749, Contig1239:65797, Contig7045:10766, Contig4124:74775, Contig3591:355817, Contig3591:355811, Contig5699:39205, Contig5437:119012, Contig5437:264973, Contig5437:265012, Contig1182:192402
14B	7.163	8	2662, 2661, 2660, 2659, 2658, 6108, 6109, 6110	Contig1801:150879, Contig1801:150791, Contig1801:150790, Contig1801:150729, Contig1800:480712, Contig6125:100115, Contig6125:100116, Contig6125:100117
14B	16.757	3	6111, 6112, 6113	Contig6125:242127, Contig6125:415671, Contig6125:449662
14B	19.171	7	6114, 4016, 3288, 3287, 3286, 3285, 3284	Contig6125:592472, Contig3072:279903, Contig2313:1683798, Contig2313:1457597, Contig2313:1457565, Contig2313:1411643, Contig2313:1410517
14B	29.047	14	281, 280, 3364, 3774, 2588, 2587, 2586, 1214, 3011, 5751, 5752, 5753, 5754, 5755	Contig186:88312, Contig186:88292, Contig2386:122990, Contig2832:164826, Contig1754:92854, Contig1754:92698, Contig1754:28230, Contig850:397486, Contig2104:181351, Contig5352:97098, Contig5352:152810, Contig5352:152982, Contig5352:200537, Contig5352:443068
14B	31.8452	37	2941, 2942, 2438, 2437, 2436, 2435, 2434, 2433, 2432, 2431, 2430, 2429, 2428, 2427, 2426, 2425, 2424, 2423, 2422, 2421, 2420, 1611, 1609, 1608, 1607, 1606, 1605, 1604, 1603, 1602, 1601, 1600, 1599, 1598, 1597, 1596, 1595	Contig2034:165591, Contig2034:334038, Contig1606:826056, Contig1606:622436, Contig1606:583546, Contig1606:583491, Contig1606:583418, Contig1606:583411, Contig1606:583410, Contig1606:540665, Contig1606:442343, Contig1606:417679, Contig1606:373999, Contig1606:373888, Contig1606:373840, Contig1606:352921, Contig1606:328408, Contig1606:215861, Contig1606:117309, Contig1606:102402, Contig1606:102329, …
14B	41.2833	10	1594, 1593, 1592, 1591, 1590, 1589, 1588, 1587, 1586, 1585	Contig1105:736209, Contig1105:494441, Contig1105:494411, Contig1105:320160, Contig1105:261455, Contig1105:250087, Contig1105:250080, Contig1105:250054, Contig1105:250044, Contig1105:249958
14B	43.4184	12	1612, 1239, 1240, 1241, 1242, 1243, 1244, 1245, 1246, 1247, 1248, 1249	Contig1106:320117, Contig869:5801, Contig869:5891, Contig869:44046, Contig869:77635, Contig869:92373, Contig869:112379, Contig869:112474, Contig869:333444, Contig869:578157, Contig869:683849, Contig869:865108
14B	50.4526	20	1250, 1251, 1252, 1253, 1254, 1255, 1256, 1257, 1258, 1259, 1260, 1261, 1262, 1263, 1264, 1265, 1266, 1267, 1268, 4693	Contig869:960515, Contig869:960516, Contig869:960517, Contig869:960582, Contig869:1082262, Contig869:1082285, Contig869:1121869, Contig869:1121895, Contig869:1121898, Contig869:1127558, Contig869:1157046, Contig869:1157125, Contig869:1185800, Contig869:1383511, Contig869:1420465, Contig869:1420470, Contig869:1420595, Contig869:1481642, Contig869:1679621, Contig3793:52564
14B	60.704	5	2346, 2347, 2348, 2349, 2350	Contig1554:1015231, Contig1554:1031636, Contig1554:1031790, Contig1554:1041640, Contig1554:1088909
14B	68.101	12	2351, 2352, 2353, 7402, 7401, 7400, 544, 543, 541, 5009, 5010, 5011	Contig1554:1403502, Contig1554:1403517, Contig1554:1403531, Contig11472:132913, Contig11472:132784, Contig11472:132781, Contig381:951017, Contig381:791348, Contig381:251170, Contig4259:40992, Contig4259:40998, Contig4259:41002
15A	0.849567	67	1332, 1333, 1334, 5866, 3925, 6405, 6404, 6403, 6402, 6401, 6679, 6678, 6677, 6676, 6675, 6548, 7388, 6851, 6850, 2468, 2469, 2470, 5856, 762, 763, 2339, 2340, 6317, 2585, 3104, 3103, 3102, 3101, 3100, 3099, 3098, 3097, 3096, 3095, 3094, 3093, 3092, 3091, 3090, 3089, 3088, 3087, 3086, 3085, 3084, 3083, 6099, 6098, 5106, 5107, 5108, 5109, 2965, 2964, 2963, 2962, 2961, 6547, 6546, 6545, 6544, 6543	Contig927:51489, Contig927:51493, Contig927:51503, Contig5665:25143, Contig2994:144661, Contig6822:62119, Contig6822:62109, Contig6822:62095, Contig6822:62086, Contig6822:62083, Contig7672:129712, Contig7672:55353, Contig7672:55308, Contig7672:55244, Contig7672:55241, Contig7196:80081, Contig11391:34514, Contig8449:26890, Contig8449:26881, Contig1652:832, Contig1652:838, Contig1652:863, Contig562…
15A	10.907	4	2972, 2971, 2970, 2969	Contig2059:507510, Contig2059:507473, Contig2059:507394, Contig2059:507369
15A	16.4147	7	3159, 3158, 3157, 3023, 3022, 3021, 3020	Contig2231:465764, Contig2231:334775, Contig2231:154428, Contig2110:847847, Contig2110:847835, Contig2110:847819, Contig2110:680334
15A	19.5845	24	3019, 3018, 3017, 3016, 3015, 5077, 5078, 3323, 3322, 3321, 3320, 3319, 3318, 3317, 3316, 3315, 3314, 3313, 3312, 3311, 3310, 3308, 3307, 3306	Contig2110:364515, Contig2110:364448, Contig2110:312450, Contig2110:312448, Contig2110:312445, Contig4367:31690, Contig4367:263801, Contig2335:1797652, Contig2335:1613762, Contig2335:1613670, Contig2335:1584754, Contig2335:1523769, Contig2335:1496536, Contig2335:1496510, Contig2335:1416589, Contig2335:1250558, Contig2335:1045870, Contig2335:1045864, Contig2335:1032414, Contig2335:977543, Contig23…
15A	28.0398	34	3304, 3303, 2449, 2448, 2447, 2446, 2167, 2168, 2169, 2170, 2171, 4347, 4069, 7440, 7439, 5992, 5486, 4086, 4087, 4088, 4089, 4090, 4091, 4092, 4093, 4094, 4095, 4096, 4097, 4098, 4099, 4100, 4101, 4102	Contig2335:48424, Contig2335:19158, Contig1627:251171, Contig1627:207105, Contig1627:207096, Contig1627:98272, Contig1454:122524, Contig1454:285996, Contig1454:663068, Contig1454:924129, Contig1454:924198, Contig3314:201138, Contig3102:574177, Contig11875:3302, Contig11875:3264, Contig5879:98739, Contig4868:158263, Contig3123:116751, Contig3123:116753, Contig3123:238705, Contig3123:238772, Contig…
15A	32.564	33	4103, 4104, 4105, 4106, 4107, 4108, 4109, 4110, 4111, 4112, 4113, 4114, 4115, 4116, 4117, 4118, 4119, 4120, 4121, 4122, 4123, 4124, 4125, 4126, 4127, 4128, 4129, 4130, 4131, 4132, 212, 213, 214	Contig3123:547599, Contig3123:597054, Contig3123:617954, Contig3123:617959, Contig3123:617983, Contig3123:618038, Contig3123:618080, Contig3123:618081, Contig3123:623587, Contig3123:623684, Contig3123:820366, Contig3123:827715, Contig3123:827747, Contig3123:953925, Contig3123:953942, Contig3123:960322, Contig3123:1117289, Contig3123:1153265, Contig3123:1185722, Contig3123:1211882, Contig3123:1341…
15A	40.3578	5	2086, 2085, 2084, 2083, 2082	Contig1408:521449, Contig1408:474631, Contig1408:288747, Contig1408:172767, Contig1408:160851
15A	43.6536	37	2081, 2080, 2079, 704, 705, 706, 707, 708, 709, 710, 711, 712, 713, 714, 715, 716, 6802, 6803, 6804, 6805, 3409, 3410, 3411, 3412, 3413, 3414, 3415, 3416, 3421, 3422, 3423, 3424, 3425, 3426, 3427, 4605, 4606	Contig1408:136246, Contig1408:78678, Contig1408:44121, Contig506:9390, Contig506:296557, Contig506:384454, Contig506:411737, Contig506:596561, Contig506:596603, Contig506:676843, Contig506:676941, Contig506:723246, Contig506:723365, Contig506:723384, Contig506:854969, Contig506:855018, Contig8163:22806, Contig8163:175172, Contig8163:175258, Contig8163:175270, Contig2422:14721, Contig2422:14770, C…
15A	52.5856	62	6956, 3568, 3569, 3570, 3571, 3572, 3573, 3574, 3575, 6006, 6001, 6000, 5999, 5998, 5997, 2412, 2411, 2410, 2409, 2408, 2407, 2406, 2405, 2404, 2403, 2402, 2401, 1936, 1935, 1934, 1933, 1930, 1929, 332, 331, 4675, 4676, 6616, 5038, 5037, 6246, 6693, 1116, 3584, 3585, 3586, 3587, 5757, 5756, 7426, 7425, 7424, 7423, 3781, 3142, 3141, 7190, 7189, 7188, 7187, 7186, 7603	Contig9005:22516, Contig2602:220481, Contig2602:644506, Contig2602:644515, Contig2602:704553, Contig2602:704571, Contig2602:704636, Contig2602:732932, Contig2602:732946, Contig5891:410085, Contig5891:354574, Contig5891:354463, Contig5891:213783, Contig5891:203407, Contig5891:58891, Contig1585:210773, Contig1585:210738, Contig1585:210621, Contig1585:156118, Contig1585:97264, Contig1585:97230, Cont…
15A	56.5258	20	4695, 5833, 2724, 2723, 2722, 7134, 7135, 7136, 5842, 7563, 6902, 6903, 4371, 4372, 4828, 5315, 6868, 6869, 6870, 6871	Contig3797:494678, Contig5568:94365, Contig1830:353589, Contig1830:114331, Contig1830:114262, Contig9891:168891, Contig9891:168992, Contig9891:169030, Contig5584:375271, Contig13307:10506, Contig8759:118800, Contig8759:118867, Contig3343:147980, Contig3343:148036, Contig3960:75189, Contig4645:122032, Contig8551:28933, Contig8551:29088, Contig8551:56997, Contig8551:57016
15B	0.878427	96	4648, 4649, 4735, 4734, 4743, 4741, 4740, 4739, 4738, 4737, 4736, 6599, 6598, 1547, 1546, 1545, 2507, 2508, 2509, 2510, 2511, 3637, 6430, 96, 95, 94, 92, 91, 4561, 4560, 4559, 4557, 4556, 4555, 6492, 6491, 5761, 5762, 2113, 2114, 2115, 2116, 2117, 2118, 2119, 2120, 2121, 2122, 2123, 2124, 4724, 4725, 4726, 4156, 4157, 4158, 4159, 4160, 4161, 4162, 4163, 4155, 4451, 4452, 4453, 731, 732, 734, 735,…	Contig3734:34980, Contig3734:35071, Contig3843:404636, Contig3843:132339, Contig3844:1064608, Contig3844:826327, Contig3844:759765, Contig3844:759731, Contig3844:656365, Contig3844:649683, Contig3844:21447, Contig7418:251755, Contig7418:251710, Contig1086:412436, Contig1086:412420, Contig1086:412365, Contig1706:778486, Contig1706:817683, Contig1706:1081512, Contig1706:1081530, Contig1706:1132497,…
15B	11.929	18	3537, 3538, 3539, 3221, 3222, 3223, 3224, 3225, 3226, 3227, 3229, 3230, 3231, 3232, 3233, 3234, 3235, 3236	Contig2540:299444, Contig2540:401924, Contig2540:967034, Contig2263:264162, Contig2263:500805, Contig2263:630225, Contig2263:630227, Contig2263:630291, Contig2263:650151, Contig2263:650169, Contig2263:728934, Contig2263:1090367, Contig2263:1090420, Contig2263:1090455, Contig2263:1090461, Contig2263:1326059, Contig2263:1326167, Contig2263:1326173
15B	22.241	21	1045, 1046, 1047, 1048, 1049, 1050, 1051, 1052, 1053, 1054, 1055, 1056, 1057, 1058, 1060, 1061, 1062, 1063, 1064, 1065, 1066	Contig724:45224, Contig724:99555, Contig724:99680, Contig724:277546, Contig724:316627, Contig724:316688, Contig724:316693, Contig724:316797, Contig724:340913, Contig724:374835, Contig724:374923, Contig724:829153, Contig724:829237, Contig724:933364, Contig724:1122331, Contig724:1122334, Contig724:1122335, Contig724:1122377, Contig724:1175557, Contig724:1311697, Contig724:1337681
15B	34.3158	40	1067, 1085, 1086, 1087, 1088, 1089, 1090, 1091, 1352, 1353, 1354, 1355, 1356, 1357, 1358, 1359, 1362, 1363, 1364, 1365, 1366, 1367, 1368, 4429, 4428, 4427, 4426, 4425, 4424, 4423, 4422, 4421, 4420, 4419, 4418, 4520, 4521, 4522, 4523, 1331	Contig724:1433293, Contig736:212089, Contig736:212182, Contig736:291716, Contig736:291785, Contig736:301281, Contig736:301375, Contig736:306827, Contig976:74693, Contig976:74765, Contig976:74789, Contig976:108441, Contig976:186586, Contig976:186719, Contig976:413430, Contig976:413532, Contig976:727628, Contig976:763418, Contig976:807468, Contig976:807535, Contig976:876593, Contig976:972435, Conti…
15B	56.238	70	5012, 6873, 6872, 3891, 3890, 666, 665, 664, 663, 3667, 3668, 3669, 35, 34, 33, 32, 31, 30, 29, 28, 6787, 6786, 6785, 6784, 6783, 6780, 3302, 3301, 3300, 3299, 1717, 1718, 1719, 1720, 1721, 1117, 1118, 1120, 4845, 3974, 3975, 3976, 3977, 3436, 3435, 3433, 5805, 5804, 931, 933, 934, 935, 936, 937, 938, 939, 940, 941, 942, 943, 944, 945, 946, 947, 948, 949, 950, 951, 952, 953	Contig4271:92760, Contig8554:20059, Contig8554:19956, Contig2943:105519, Contig2943:105488, Contig486:263868, Contig486:236699, Contig486:112739, Contig486:112646, Contig2702:94928, Contig2702:109106, Contig2702:112898, Contig8:1154909, Contig8:1154889, Contig8:1036246, Contig8:962980, Contig8:962955, Contig8:882881, Contig8:582998, Contig8:363144, Contig8129:1016214, Contig8129:1016094, Contig81…
15B	74.631	5	2486, 3596, 3595, 3594, 3593	Contig1669:43273, Contig2635:80847, Contig2635:80824, Contig2635:80818, Contig2635:56915
15B	83.359	1	4875	Contig4072:48255
15B	86.6531	18	7143, 7144, 1031, 3269, 3270, 3271, 3272, 3273, 3274, 3275, 3276, 3277, 3278, 654, 3906, 3905, 3506, 7290	Contig9907:156564, Contig9907:156611, Contig700:223561, Contig2307:72846, Contig2307:72923, Contig2307:72924, Contig2307:72925, Contig2307:72926, Contig2307:72927, Contig2307:88900, Contig2307:88971, Contig2307:89010, Contig2307:150836, Contig476:162815, Contig2968:79314, Contig2968:45139, Contig2486:92684, Contig10708:31289
16A	1.66205	21	5418, 5309, 7552, 7553, 7554, 7555, 6746, 6747, 3926, 3927, 4831, 4832, 4833, 4834, 4787, 4788, 4789, 5598, 5599, 5600, 5601	Contig4823:9569, Contig4639:32732, Contig13217:2472, Contig13217:2474, Contig13217:2510, Contig13217:2619, Contig7946:46387, Contig7946:259255, Contig2996:433886, Contig2996:433887, Contig3975:73228, Contig3975:113445, Contig3975:113486, Contig3975:113540, Contig3890:8351, Contig3890:8444, Contig3890:91395, Contig5042:62841, Contig5042:62875, Contig5042:62876, Contig5042:62978
16A	8.36725	8	4329, 7314, 7313, 6520, 6521, 1106, 1105, 1104	Contig3299:380319, Contig10840:132468, Contig10840:121899, Contig7106:125659, Contig7106:125676, Contig742:407210, Contig742:407104, Contig742:407062
16A	19.8945	18	5604, 5605, 5606, 5607, 5608, 5609, 5610, 5611, 1983, 25, 26, 4455, 703, 7185, 6759, 110, 109, 108	Contig5056:7276, Contig5056:7406, Contig5056:21494, Contig5056:21504, Contig5056:21508, Contig5056:123235, Contig5056:123243, Contig5056:319146, Contig1353:182041, Contig6:88408, Contig6:88429, Contig3432:46177, Contig504:440216, Contig10043:310366, Contig7993:412269, Contig93:1530128, Contig93:573569, Contig93:457205
16A	25.042	7	4861, 622, 5618, 5619, 5620, 5621, 5622	Contig4029:146597, Contig439:88271, Contig5070:180289, Contig5070:301245, Contig5070:324977, Contig5070:324987, Contig5070:324999
16A	39.8794	24	3343, 3342, 3341, 4476, 7656, 7657, 6469, 6470, 6471, 6472, 6473, 6474, 6475, 6476, 6477, 4611, 4612, 6913, 6912, 6911, 6910, 1470, 1471, 1472	Contig2362:633929, Contig2362:218559, Contig2362:20688, Contig3485:621702, Contig15277:37282, Contig15277:37312, Contig6960:69641, Contig6960:132486, Contig6960:132492, Contig6960:132602, Contig6960:132644, Contig6960:169236, Contig6960:169264, Contig6960:169314, Contig6960:169360, Contig3655:93425, Contig3655:154593, Contig8805:18729, Contig8805:18726, Contig8805:18704, Contig8805:18604, Contig1…
16A	45.962	23	1473, 1474, 1475, 1476, 1477, 1478, 4984, 4986, 4987, 4988, 4989, 4990, 4991, 4992, 2987, 2988, 2989, 2985, 2986, 1955, 1952, 1951, 1950	Contig1018:330004, Contig1018:330145, Contig1018:464052, Contig1018:470628, Contig1018:629880, Contig1018:634160, Contig4248:81381, Contig4248:102669, Contig4248:203614, Contig4248:275673, Contig4248:275709, Contig4248:292220, Contig4248:404125, Contig4248:404156, Contig2075:36876, Contig2075:162701, Contig2075:191221, Contig2074:21774, Contig2074:188006, Contig1320:653314, Contig1320:256902, Con…
16A	51.572	39	1956, 1957, 1958, 1959, 2949, 2948, 2947, 2946, 2945, 3357, 3356, 3355, 3354, 4153, 4154, 961, 962, 963, 964, 965, 966, 967, 968, 969, 970, 971, 972, 1796, 1795, 1792, 1763, 1762, 1761, 1760, 1759, 5221, 5222, 5223, 5224	Contig1321:91001, Contig1321:277899, Contig1321:371872, Contig1321:371896, Contig2042:260050, Contig2042:260018, Contig2042:259972, Contig2042:170149, Contig2042:48854, Contig2370:287552, Contig2370:206631, Contig2370:206627, Contig2370:206608, Contig3131:127377, Contig3131:139225, Contig664:119015, Contig664:210952, Contig665:96820, Contig665:96922, Contig665:444345, Contig665:444368, Contig665:…
16A	62.9679	9	5225, 5226, 5227, 5228, 2918, 2917, 3245, 512, 513	Contig4542:390839, Contig4542:535348, Contig4542:565424, Contig4542:575309, Contig2015:45099, Contig2015:44984, Contig2272:170682, Contig367:645195, Contig367:645299
16A	67.208	8	3933, 3932, 3931, 3930, 6062, 5932, 5931, 3565	Contig3003:171830, Contig3003:109019, Contig3003:108965, Contig3003:108954, Contig6016:302557, Contig5775:299850, Contig5775:299769, Contig2599:654763
16A	72.6485	12	3566, 1530, 1531, 4823, 4822, 2977, 2978, 2979, 2980, 2981, 6516, 6515	Contig2600:82214, Contig1080:83520, Contig1080:83522, Contig3945:411660, Contig3945:411659, Contig2066:84624, Contig2066:84721, Contig2066:102974, Contig2066:148979, Contig2066:148986, Contig7091:86769, Contig7091:86679
16B	1.65985	26	811, 802, 803, 804, 3444, 3445, 3446, 872, 873, 874, 875, 876, 878, 879, 880, 881, 7385, 2798, 2799, 2800, 2801, 2802, 2803, 2804, 2805, 2806	Contig562:181695, Contig561:74247, Contig561:225590, Contig561:225678, Contig2434:162989, Contig2434:162996, Contig2434:163029, Contig609:94230, Contig609:135320, Contig609:339483, Contig609:339484, Contig609:339520, Contig609:496812, Contig609:496850, Contig609:585125, Contig609:585155, Contig11373:7977, Contig1894:88074, Contig1894:96312, Contig1894:96371, Contig1894:96395, Contig1894:101384, C…
16B	11.066	8	5069, 5070, 5071, 7257, 6573, 6574, 6575, 6576	Contig4360:11820, Contig4360:11935, Contig4360:54090, Contig10392:64902, Contig7303:193491, Contig7303:193496, Contig7303:193551, Contig7303:222891
16B	13.761	2	5835, 5836	Contig5573:15957, Contig5573:36385
16B	21.0306	23	6122, 6123, 6124, 6425, 6429, 4857, 1043, 4829, 5851, 5850, 5849, 5848, 5847, 6499, 6498, 6497, 7204, 7203, 7202, 7201, 5568, 5567, 5566	Contig6168:240081, Contig6168:240093, Contig6168:268082, Contig6899:106918, Contig6899:147110, Contig4023:514177, Contig713:276799, Contig3964:479994, Contig5598:414899, Contig5598:156070, Contig5598:156060, Contig5598:138129, Contig5598:116212, Contig7041:111849, Contig7041:111715, Contig7041:111701, Contig10153:59760, Contig10153:59740, Contig10153:34193, Contig10153:32348, Contig4971:166714, C…
16B	27.7536	16	4494, 4495, 4496, 4497, 4498, 4499, 4500, 4501, 1213, 1212, 1211, 1210, 1209, 1216, 1219, 4483	Contig3539:192423, Contig3539:192447, Contig3539:192461, Contig3539:345971, Contig3539:345994, Contig3539:346003, Contig3539:447216, Contig3539:447233, Contig849:97034, Contig849:97007, Contig849:37247, Contig849:37192, Contig849:37170, Contig851:17084, Contig851:240000, Contig3509:33822
16B	35.1281	8	5095, 5096, 5097, 5098, 5099, 5100, 5101, 4198	Contig4421:14949, Contig4421:14997, Contig4421:52432, Contig4421:52475, Contig4421:538212, Contig4421:683749, Contig4421:744703, Contig3168:342472
16B	42.854	12	6905, 6904, 6906, 20, 19, 18, 17, 16, 15, 14, 13, 12	Contig8765:87827, Contig8764:109737, Contig8766:11216, Contig0:905502, Contig0:905442, Contig0:843685, Contig0:843564, Contig0:787863, Contig0:678027, Contig0:631288, Contig0:631236, Contig0:552762
16B	52.338	22	8, 7, 6, 5, 1854, 1855, 1856, 1857, 1859, 1860, 1861, 1862, 7643, 7644, 7288, 7287, 7286, 7285, 5209, 1280, 1279, 1278	Contig0:124935, Contig0:124916, Contig0:124847, Contig0:86135, Contig1258:41498, Contig1258:41505, Contig1258:41617, Contig1258:119349, Contig1258:355958, Contig1258:522094, Contig1258:564648, Contig1258:564651, Contig14740:16062, Contig14740:16219, Contig10661:94068, Contig10661:94049, Contig10661:93975, Contig10661:93930, Contig4531:56678, Contig875:347579, Contig875:250293, Contig875:250266
16B	58.2101	36	1277, 5706, 5705, 5704, 5700, 5699, 5698, 5697, 5696, 5695, 5694, 6313, 6312, 6311, 6310, 6309, 5385, 5389, 7353, 7354, 6842, 6841, 6840, 4204, 4203, 4202, 4201, 4199, 6727, 3505, 2180, 2179, 2178, 2177, 2176, 6763	Contig875:70490, Contig5296:416942, Contig5296:416894, Contig5296:388524, Contig5296:102393, Contig5296:53025, Contig5296:53024, Contig5296:52978, Contig5296:52956, Contig5296:52907, Contig5295:41503, Contig6555:191157, Contig6555:191143, Contig6555:26351, Contig6555:26346, Contig6555:26290, Contig4779:21473, Contig4779:621089, Contig11124:5742, Contig11124:5762, Contig8349:142195, Contig8349:925…
16B	64.2032	13	1878, 1877, 1876, 1875, 1874, 4394, 4393, 4392, 2721, 2720, 2719, 2718, 2717	Contig1267:535503, Contig1267:535456, Contig1267:488243, Contig1267:129994, Contig1267:129919, Contig3372:231828, Contig3372:57783, Contig3372:57774, Contig1827:827739, Contig1827:809477, Contig1827:748320, Contig1827:612385, Contig1827:538603
16B	69.859	8	2716, 2714, 2713, 2712, 2392, 2391, 2390, 2389	Contig1827:315493, Contig1827:171080, Contig1827:147728, Contig1827:147637, Contig1578:263378, Contig1578:263350, Contig1578:250462, Contig1578:240835
16B	74.2213	13	2388, 2387, 2386, 6082, 6081, 6080, 6079, 6078, 6077, 3072, 3073, 3074, 3075	Contig1578:228818, Contig1578:44158, Contig1578:44090, Contig6057:704969, Contig6057:704966, Contig6057:704963, Contig6057:370900, Contig6057:298739, Contig6057:40528, Contig2146:136150, Contig2146:1333988, Contig2146:1334073, Contig2146:1421006
16B	93.812	6	4184, 4183, 4182, 4181, 4180, 4179	Contig3159:93143, Contig3159:93119, Contig3159:93118, Contig3159:2385, Contig3159:2373, Contig3159:2370
16B	98.708	2	89, 88	Contig77:398393, Contig77:59703
16B	106.104	7	259, 260, 835, 834, 833, 959, 960	Contig154:129197, Contig154:129204, Contig583:1050732, Contig583:353450, Contig583:353401, Contig660:4519, Contig660:4541
17A	0	22	3153, 3152, 309, 308, 320, 319, 4539, 4540, 4541, 101, 100, 99, 98, 97, 3382, 3383, 2559, 6637, 2672, 2673, 2677, 4315	Contig2224:59298, Contig2224:59290, Contig226:401885, Contig226:124597, Contig231:310220, Contig231:310218, Contig3568:39571, Contig3568:39573, Contig3568:39627, Contig87:1207324, Contig87:944980, Contig87:944849, Contig87:471771, Contig87:163089, Contig2401:248781, Contig2402:6497, Contig1722:263367, Contig7545:12749, Contig1808:399213, Contig1808:399354, Contig1808:967824, Contig3293:663332
17A	31.239	10	4316, 4318, 4319, 4320, 4321, 4323, 4324, 4325, 4326, 4327	Contig3293:952906, Contig3293:1258416, Contig3293:1506840, Contig3293:1730912, Contig3293:1920799, Contig3293:2181000, Contig3293:2181012, Contig3293:2181014, Contig3293:2181026, Contig3293:2181112
17A	46.3224	17	2189, 2188, 2187, 2186, 2185, 2184, 2183, 2182, 2181, 87, 5488, 5489, 5490, 5491, 5492, 5493, 5494	Contig1458:1555420, Contig1458:1158765, Contig1458:1158642, Contig1458:1158634, Contig1458:1061280, Contig1458:872428, Contig1458:714582, Contig1458:521498, Contig1458:307227, Contig75:55368, Contig4885:218125, Contig4885:571281, Contig4885:571299, Contig4885:571305, Contig4885:605564, Contig4885:605683, Contig4885:811793
17A	50.4331	19	5495, 5496, 5502, 7180, 7181, 3292, 3293, 3294, 3295, 3237, 3238, 6209, 6208, 3001, 1073, 1072, 1071, 1070, 1069	Contig4885:888608, Contig4885:888631, Contig4885:1086876, Contig10028:5085, Contig10028:5201, Contig2322:2548, Contig2322:2632, Contig2322:2639, Contig2322:668199, Contig2265:141483, Contig2265:201663, Contig6328:74200, Contig6328:38874, Contig2086:104642, Contig728:480860, Contig728:277913, Contig728:277826, Contig728:18882, Contig728:18846
17A	55.8783	3	6139, 3327, 5658	Contig6180:349414, Contig2342:347627, Contig5181:428626
17A	62.911	3	5841, 6480, 6481	Contig5580:463365, Contig6974:278142, Contig6974:824431
17A	70.7746	9	6056, 836, 837, 838, 839, 840, 841, 5378, 5377	Contig5979:429836, Contig586:95243, Contig586:101675, Contig586:170891, Contig586:170979, Contig586:171027, Contig586:171035, Contig4776:271612, Contig4776:180869
17A	87.672	11	6990, 6989, 4841, 4840, 4839, 2321, 482, 483, 484, 1698, 1699	Contig9122:626859, Contig9122:626707, Contig3986:1353881, Contig3986:1297547, Contig3986:246815, Contig1515:24719, Contig349:182732, Contig349:934134, Contig349:940288, Contig1170:443868, Contig1170:548305
17A	92.4311	9	1700, 1701, 1702, 1703, 2570, 2569, 2568, 2567, 2565	Contig1170:631504, Contig1170:641592, Contig1170:646940, Contig1170:646976, Contig1735:803659, Contig1735:803539, Contig1735:803535, Contig1735:789773, Contig1735:725579
17A	99.893	6	5554, 3683, 5716, 1947, 1948, 1949	Contig4935:35373, Contig2712:220177, Contig5306:139227, Contig1318:41626, Contig1318:385233, Contig1318:396182
17A	105.437	13	4531, 4532, 4533, 4534, 4535, 6959, 6960, 2877, 2876, 2875, 2874, 4354, 6257	Contig3565:176803, Contig3565:176824, Contig3565:176853, Contig3565:266518, Contig3565:293048, Contig9012:30528, Contig9012:30539, Contig1940:307507, Contig1940:307494, Contig1940:189747, Contig1940:189640, Contig3325:97877, Contig6468:87891
17B	2.68728	18	5915, 5551, 276, 4299, 4300, 4301, 4298, 4812, 4813, 4814, 4818, 4819, 5774, 5773, 5772, 5771, 5770, 7089	Contig5752:71450, Contig4932:19569, Contig173:360356, Contig3279:96940, Contig3279:196430, Contig3279:209162, Contig3278:219697, Contig3935:382375, Contig3935:441530, Contig3935:502073, Contig3936:132913, Contig3936:133024, Contig5418:92785, Contig5418:92769, Contig5418:92719, Contig5418:92679, Contig5418:92653, Contig9604:79693
17B	20.7029	9	2215, 2214, 2839, 2836, 2835, 1566, 1567, 1568, 3704	Contig1472:573306, Contig1472:439350, Contig1916:773514, Contig1915:1137880, Contig1915:511806, Contig1096:535364, Contig1096:535365, Contig1096:878654, Contig2745:199936
17B	27.69	2	1350, 2324	Contig974:164539, Contig1524:42009
17B	32.6833	4	7022, 241, 240, 3002	Contig9235:45651, Contig140:286264, Contig140:133260, Contig2090:126053
17B	40.0606	20	4745, 4746, 4747, 2370, 2367, 2366, 2365, 2364, 1081, 1080, 1079, 1078, 1077, 377, 378, 379, 2633, 3853, 3854, 3338	Contig3849:158668, Contig3849:158677, Contig3849:418096, Contig1562:1198076, Contig1562:560854, Contig1562:547338, Contig1562:364980, Contig1562:341441, Contig732:397587, Contig732:227789, Contig732:164678, Contig732:164659, Contig732:164658, Contig270:434192, Contig270:464904, Contig270:650014, Contig1784:539802, Contig2884:721937, Contig2884:956647, Contig2357:903946
17B	45.902	9	774, 773, 5581, 5580, 5579, 7565, 5125, 5126, 5127	Contig547:33259, Contig547:33235, Contig4981:256794, Contig4981:232851, Contig4981:227596, Contig13340:99365, Contig4435:16806, Contig4435:117046, Contig4435:122969
17B	56.359	13	7684, 5647, 5646, 5881, 6411, 6807, 5553, 4905, 4904, 4903, 4902, 4901, 2976	Contig17748:2259, Contig5121:116689, Contig5121:8393, Contig5701:215631, Contig6845:211485, Contig8180:144243, Contig4934:23831, Contig4099:116771, Contig4099:116622, Contig4099:116621, Contig4099:116620, Contig4099:116618, Contig2065:250552
18A	4.08183	29	6479, 7116, 2254, 2253, 7454, 6057, 1497, 1498, 1499, 1500, 1501, 1502, 1758, 1757, 1756, 1755, 1754, 1753, 1429, 1430, 1431, 1432, 1433, 1434, 1435, 1436, 1437, 3297, 3296	Contig6969:89324, Contig9722:56864, Contig1484:90332, Contig1484:90211, Contig12008:74882, Contig5983:86769, Contig1056:30825, Contig1056:30908, Contig1056:30925, Contig1056:30927, Contig1056:30950, Contig1056:30963, Contig1203:425107, Contig1203:107466, Contig1203:86330, Contig1203:86289, Contig1203:86206, Contig1203:86201, Contig997:62386, Contig997:62447, Contig997:164912, Contig997:207091, Co…
18A	11.692	5	4308, 4307, 4306, 4305, 4304	Contig3281:435696, Contig3281:219153, Contig3281:219136, Contig3281:205214, Contig3281:155458
18A	15.342	4	3432, 3430, 3429, 3428	Contig2424:392799, Contig2424:62285, Contig2424:62281, Contig2424:62235
18A	21.859	4	1439, 3399, 3400, 3401	Contig999:842731, Contig2412:6410, Contig2412:110855, Contig2412:110896
18A	26.964	14	6193, 6192, 6191, 6190, 6189, 6188, 6186, 6185, 1324, 1323, 1322, 1321, 1320, 1316	Contig6269:220711, Contig6269:199816, Contig6269:199797, Contig6269:199791, Contig6269:199650, Contig6269:199645, Contig6269:49001, Contig6269:48994, Contig917:325623, Contig917:325603, Contig917:325552, Contig917:325529, Contig917:221765, Contig917:63320
18A	31.8001	19	1396, 1397, 1398, 1399, 1400, 1401, 1402, 1403, 1404, 4252, 4251, 4250, 4249, 4248, 4247, 4246, 4245, 4244, 3882	Contig987:218319, Contig987:252170, Contig987:435997, Contig987:436149, Contig987:496721, Contig987:517243, Contig987:517304, Contig987:528315, Contig987:536546, Contig3229:235380, Contig3229:202610, Contig3229:165278, Contig3229:161986, Contig3229:121713, Contig3229:50600, Contig3229:50565, Contig3229:50532, Contig3229:22768, Contig2934:82383
18A	37.511	25	3883, 2019, 2020, 2021, 2023, 2024, 2025, 2026, 2027, 2028, 2029, 2030, 2031, 2032, 2033, 2034, 2037, 2038, 2039, 2040, 2041, 2044, 2045, 2046, 2047	Contig2934:183142, Contig1381:15235, Contig1381:15242, Contig1381:15288, Contig1381:62080, Contig1381:172478, Contig1381:172562, Contig1381:173089, Contig1381:173132, Contig1381:174370, Contig1381:174484, Contig1381:177953, Contig1381:179485, Contig1381:224582, Contig1381:224600, Contig1381:224652, Contig1381:448219, Contig1381:448264, Contig1381:474179, Contig1381:474225, Contig1381:474238, Cont…
18A	45.2556	59	2048, 2049, 2050, 2051, 3850, 3849, 3848, 3847, 3846, 3845, 3844, 3843, 3842, 3841, 3840, 3839, 3837, 3836, 3835, 3834, 3833, 3832, 3831, 3830, 3829, 3828, 5076, 5075, 5074, 2071, 2072, 2073, 2074, 2075, 2076, 2077, 5210, 3785, 3786, 5816, 380, 4825, 4824, 4826, 6845, 6846, 6847, 6808, 5504, 5505, 5506, 5507, 5508, 5509, 5510, 6211, 7378, 242, 243	Contig1381:987350, Contig1381:987357, Contig1381:1016826, Contig1381:1016898, Contig2883:1180162, Contig2883:1180121, Contig2883:1180102, Contig2883:1180051, Contig2883:1175908, Contig2883:1175807, Contig2883:1093851, Contig2883:1093808, Contig2883:924498, Contig2883:924497, Contig2883:803118, Contig2883:751531, Contig2883:608369, Contig2883:608356, Contig2883:608300, Contig2883:594524, Contig288…
18A	50.6287	24	603, 604, 605, 606, 607, 608, 609, 610, 518, 519, 520, 521, 522, 523, 524, 525, 526, 527, 528, 529, 530, 531, 3557, 3559	Contig421:394459, Contig421:394534, Contig421:394596, Contig421:394600, Contig421:568383, Contig421:729431, Contig421:729567, Contig421:759357, Contig370:316240, Contig370:323911, Contig370:323912, Contig370:323981, Contig370:325550, Contig370:495425, Contig370:576921, Contig370:576972, Contig370:580382, Contig370:580446, Contig370:602206, Contig370:602229, Contig370:620182, Contig370:620253, Con…
18A	57.0873	23	2752, 2751, 2750, 2749, 2748, 2745, 2744, 2743, 2742, 2928, 2927, 2926, 7334, 7335, 7336, 7337, 7338, 7339, 1645, 1646, 1647, 1648, 1649	Contig1856:770300, Contig1856:393696, Contig1856:393695, Contig1856:356808, Contig1856:356688, Contig1856:246876, Contig1856:231315, Contig1856:231305, Contig1856:127970, Contig2023:255360, Contig2023:80385, Contig2023:80333, Contig11007:17075, Contig11007:17105, Contig11007:165749, Contig11007:165794, Contig11007:285653, Contig11007:313619, Contig1142:171310, Contig1142:203152, Contig1142:215530…
18A	62.3042	33	1650, 1651, 1652, 1653, 1654, 1655, 1656, 1658, 1659, 1660, 1661, 1662, 1663, 1664, 1665, 1666, 1667, 1668, 1669, 1670, 6664, 6665, 6666, 6667, 2621, 2620, 2619, 2618, 2617, 2616, 2615, 2614, 2613	Contig1142:401194, Contig1142:525752, Contig1142:537914, Contig1142:538011, Contig1142:538014, Contig1142:538050, Contig1142:609921, Contig1142:822765, Contig1142:822863, Contig1142:876281, Contig1142:876294, Contig1142:995366, Contig1142:995512, Contig1142:997250, Contig1142:1002939, Contig1142:1025484, Contig1142:1035943, Contig1142:1148810, Contig1142:1148845, Contig1142:1240601, Contig7641:58…
18A	66.7983	17	2612, 2611, 2610, 2609, 2608, 2607, 2606, 2605, 2604, 2602, 2601, 2600, 2599, 2598, 2597, 2912, 2911	Contig1773:317344, Contig1773:317333, Contig1773:317238, Contig1773:291170, Contig1773:288723, Contig1773:288677, Contig1773:256745, Contig1773:256724, Contig1773:256661, Contig1773:139845, Contig1773:132954, Contig1773:39472, Contig1773:39455, Contig1773:16736, Contig1773:16701, Contig2002:744508, Contig2002:744461
18A	75.8268	10	2910, 2909, 2908, 2907, 2906, 2905, 2904, 2902, 2901, 5683	Contig2002:670936, Contig2002:588864, Contig2002:583902, Contig2002:583892, Contig2002:559178, Contig2002:479665, Contig2002:262280, Contig2002:148523, Contig2002:16333, Contig5264:652132
18A	80.2984	21	5681, 5680, 5679, 5678, 5677, 5676, 2960, 2959, 2958, 2957, 2956, 2955, 2954, 2953, 2952, 2951, 2950, 2203, 2204, 2205, 2206	Contig5264:99870, Contig5264:97275, Contig5264:97179, Contig5264:97170, Contig5264:97137, Contig5264:47589, Contig2047:405421, Contig2047:405404, Contig2047:297086, Contig2047:258032, Contig2047:257945, Contig2047:195595, Contig2047:195582, Contig2047:195431, Contig2047:79661, Contig2047:79634, Contig2047:34712, Contig1471:17200, Contig1471:596267, Contig1471:596270, Contig1471:596274
18A	84.881	15	2207, 2208, 2209, 2210, 2211, 2213, 3324, 3501, 3500, 306, 307, 5860, 5861, 5862, 5863	Contig1471:894008, Contig1471:894101, Contig1471:1144404, Contig1471:1144469, Contig1471:1144474, Contig1471:1555202, Contig2338:187163, Contig2481:32412, Contig2480:75513, Contig225:68513, Contig225:68645, Contig5657:13550, Contig5657:13567, Contig5657:13572, Contig5657:13616
18B	1.15209	47	2416, 2417, 2418, 2419, 4143, 4142, 4141, 4140, 4139, 1345, 1344, 1343, 1342, 1341, 1340, 5158, 6388, 6387, 7269, 2414, 2415, 1887, 1886, 1883, 7557, 7556, 5033, 5032, 5031, 5030, 5029, 4699, 4698, 4697, 4696, 2701, 2702, 2703, 2704, 2705, 2706, 2707, 3944, 3943, 3942, 3941, 3940	Contig1604:30813, Contig1604:71059, Contig1604:71137, Contig1604:71212, Contig3127:399325, Contig3127:201478, Contig3127:104869, Contig3127:57069, Contig3127:616, Contig937:211208, Contig937:173998, Contig937:173872, Contig937:166950, Contig937:70375, Contig937:60791, Contig4498:75615, Contig6799:81905, Contig6799:51215, Contig10500:2533, Contig1603:10807, Contig1603:16484, Contig1277:545082, Con…
18B	8.568	18	3939, 3938, 3937, 3936, 3935, 3934, 432, 431, 430, 429, 428, 427, 426, 425, 424, 423, 422, 421	Contig3006:161589, Contig3006:161564, Contig3006:161551, Contig3006:71030, Contig3006:70934, Contig3006:58112, Contig285:1272312, Contig285:1272282, Contig285:1234307, Contig285:958969, Contig285:958886, Contig285:923698, Contig285:923680, Contig285:923671, Contig285:923639, Contig285:923551, Contig285:923548, Contig285:831831
18B	15.9515	20	420, 419, 418, 417, 416, 415, 414, 413, 412, 411, 410, 7566, 7567, 5057, 5058, 5059, 5060, 5061, 5062, 5063	Contig285:741410, Contig285:699433, Contig285:654201, Contig285:474092, Contig285:474055, Contig285:473992, Contig285:449326, Contig285:380700, Contig285:380689, Contig285:380559, Contig285:340625, Contig13361:148504, Contig13361:212113, Contig4358:74491, Contig4358:74566, Contig4358:115894, Contig4358:115957, Contig4358:134391, Contig4358:160399, Contig4358:168966
18B	22.3019	18	5064, 5065, 5066, 5067, 5068, 3182, 3183, 3184, 3185, 3186, 3187, 3188, 3189, 3190, 3191, 3192, 3193, 3194	Contig4358:383054, Contig4358:456651, Contig4358:491007, Contig4358:523114, Contig4358:523147, Contig2252:274579, Contig2252:396029, Contig2252:396072, Contig2252:396117, Contig2252:485939, Contig2252:815928, Contig2252:834201, Contig2252:834269, Contig2252:834342, Contig2252:834363, Contig2252:837526, Contig2252:837527, Contig2252:837622
18B	31.156	2	1967, 1968	Contig1325:841376, Contig1325:841447
18B	44.4828	23	3761, 3762, 3763, 3764, 3766, 3767, 3768, 649, 650, 646, 645, 644, 643, 642, 641, 640, 639, 638, 637, 636, 635, 634, 633	Contig2800:468241, Contig2800:468348, Contig2800:592467, Contig2800:679856, Contig2800:1016771, Contig2800:1032518, Contig2800:1032524, Contig460:144124, Contig460:194671, Contig449:1930964, Contig449:1760435, Contig449:1760411, Contig449:1720838, Contig449:1720743, Contig449:1658392, Contig449:1638730, Contig449:1613457, Contig449:1512677, Contig449:1362214, Contig449:1242217, Contig449:649728, …
18B	49.6561	47	632, 631, 630, 7579, 3582, 4230, 4231, 6941, 6940, 6939, 1173, 1174, 3734, 3735, 3736, 3546, 3545, 6639, 6638, 3068, 775, 5220, 5219, 5218, 5217, 5216, 5215, 5214, 5213, 5212, 5211, 352, 353, 6643, 6642, 6641, 6640, 3013, 3014, 3258, 4050, 6073, 3987, 3986, 3985, 3984, 3983	Contig449:573124, Contig449:117907, Contig449:14690, Contig13578:75218, Contig2618:47918, Contig3197:60155, Contig3197:60196, Contig8938:112191, Contig8938:112140, Contig8938:105284, Contig822:20864, Contig822:341413, Contig2777:78892, Contig2777:172357, Contig2777:354912, Contig2552:371053, Contig2552:301077, Contig7546:34477, Contig7546:34389, Contig2142:8934, Contig548:134224, Contig4538:79253…
18B	54.7874	5	3982, 3981, 3980, 6184, 6893	Contig3040:70860, Contig3040:48921, Contig3040:48890, Contig6264:87109, Contig8675:25317
18B	63.5127	7	3156, 3155, 3154, 1895, 1894, 1893, 1892	Contig2225:115298, Contig2225:115292, Contig2225:115262, Contig1280:1045433, Contig1280:898269, Contig1280:707109, Contig1280:707008
18B	68.0529	36	1891, 1890, 1889, 1888, 6629, 6630, 845, 1928, 1927, 1926, 1925, 1924, 1923, 1922, 1921, 3892, 3181, 3180, 5039, 2576, 2575, 2574, 2571, 2572, 111, 112, 113, 114, 115, 116, 117, 118, 119, 120, 121, 122	Contig1280:474443, Contig1280:437222, Contig1280:365854, Contig1280:365738, Contig7538:39808, Contig7538:39849, Contig588:107021, Contig1290:262157, Contig1290:262012, Contig1290:230921, Contig1290:187769, Contig1290:129593, Contig1290:129475, Contig1290:129436, Contig1290:57841, Contig2945:31118, Contig2245:160793, Contig2245:128207, Contig4336:50061, Contig1737:70387, Contig1737:70340, Contig17…
18B	76.7455	15	846, 847, 848, 849, 850, 851, 852, 853, 854, 855, 856, 857, 7591, 7592, 7593	Contig589:138816, Contig589:251194, Contig589:303342, Contig589:375978, Contig589:375991, Contig589:382705, Contig589:382742, Contig589:382865, Contig589:448671, Contig589:448724, Contig589:448805, Contig589:448806, Contig13895:2618, Contig13895:2622, Contig13895:2725
18B	78.9815	4	5156, 4353, 6549, 6550	Contig4474:94974, Contig3324:50208, Contig7233:13007, Contig7233:13026
19A	2.16395	19	2400, 2399, 2398, 2397, 2596, 2595, 6975, 6976, 6977, 6978, 6979, 6980, 6981, 6982, 1290, 1291, 1292, 1293, 1294	Contig1584:552433, Contig1584:371963, Contig1584:371902, Contig1584:357472, Contig1770:878590, Contig1770:673132, Contig9082:350866, Contig9082:350908, Contig9082:350982, Contig9082:350985, Contig9082:414221, Contig9082:414288, Contig9082:414289, Contig9082:414311, Contig908:670552, Contig908:789445, Contig908:972943, Contig908:1198471, Contig908:1209893
19A	8.57188	16	1295, 5934, 510, 509, 506, 5578, 5577, 5576, 3361, 449, 448, 1441, 1442, 1443, 1444, 3583	Contig908:1237067, Contig5785:332042, Contig366:464344, Contig366:258342, Contig366:60793, Contig4979:581365, Contig4979:581276, Contig4979:21939, Contig2378:915656, Contig295:8613, Contig295:8612, Contig1006:530443, Contig1006:530500, Contig1006:539849, Contig1006:539923, Contig2620:159099
19A	29.3831	12	3800, 3799, 3798, 3797, 3796, 3871, 3870, 3869, 3868, 6398, 4527, 4528	Contig2858:1691779, Contig2858:1691777, Contig2858:1688944, Contig2858:1044999, Contig2858:194551, Contig2917:179510, Contig2917:136448, Contig2917:136412, Contig2917:136301, Contig6820:206524, Contig3560:315193, Contig3560:928704
19A	35.156	6	2295, 2296, 2297, 2298, 2299, 2300	Contig1513:47044, Contig1513:99162, Contig1513:151040, Contig1513:189643, Contig1513:189804, Contig1513:544152
19A	39.066	7	2301, 2302, 6535, 6536, 6537, 6538, 6539	Contig1513:986928, Contig1513:1685959, Contig7187:72477, Contig7187:72554, Contig7187:168761, Contig7187:214658, Contig7187:214677
19A	49.613	3	3082, 6156, 6157	Contig2152:310109, Contig6196:87551, Contig6196:226763
19A	65.7225	6	7393, 5347, 5054, 5055, 3380, 2442	Contig11438:115474, Contig4694:30764, Contig4353:299510, Contig4353:433637, Contig2391:264910, Contig1625:172037
19A	71.805	3	2443, 4269, 4270	Contig1625:198986, Contig3257:125979, Contig3257:126109
19A	75.2263	7	4271, 5735, 6901, 3696, 3592, 3591, 3590	Contig3257:396058, Contig5332:87066, Contig8734:23431, Contig2725:58078, Contig2634:126703, Contig2634:126638, Contig2634:126630
19A	86.76	9	3771, 3772, 5206, 5207, 5208, 1510, 7351, 7350, 7349	Contig2821:107394, Contig2821:107474, Contig4523:31580, Contig4523:103459, Contig4523:257148, Contig1071:75268, Contig11100:97280, Contig11100:97272, Contig11100:97267
19B	0.256143	28	6061, 647, 3554, 648, 2506, 3533, 7545, 6319, 3750, 3749, 3747, 3746, 1107, 2337, 2336, 3662, 3663, 3664, 3665, 1672, 1671, 5710, 5709, 5708, 5707, 6908, 4267, 4266	Contig6010:88959, Contig453:315938, Contig2577:18338, Contig458:59742, Contig1705:343841, Contig2523:113110, Contig13122:56600, Contig6567:15170, Contig2791:1338235, Contig2791:1223246, Contig2791:77483, Contig2791:45153, Contig746:10587, Contig1535:346221, Contig1535:42025, Contig2696:464185, Contig2696:464186, Contig2696:464218, Contig2696:953486, Contig1143:199825, Contig1143:199793, Contig529…
19B	10.1643	9	2914, 2913, 3513, 3512, 3511, 1026, 433, 563, 564	Contig2005:323044, Contig2005:197466, Contig2489:84059, Contig2489:84010, Contig2489:30927, Contig695:90255, Contig287:719511, Contig400:856663, Contig400:1016235
19B	79.9067	10	7149, 3899, 3898, 6243, 6244, 7069, 3005, 3006, 1840, 1839	Contig9948:41889, Contig2964:215397, Contig2964:86990, Contig6437:46209, Contig6437:57265, Contig9421:66272, Contig2093:83264, Contig2093:99382, Contig1248:15697, Contig1248:15540
20A	1.974	8	6238, 6237, 6236, 6196, 904, 6560, 6559, 6558	Contig6409:18336, Contig6409:1824, Contig6409:1664, Contig6298:54372, Contig623:80445, Contig7237:116759, Contig7237:116724, Contig7237:116718
20A	8.628	8	5256, 813, 1575, 3706, 6502, 6314, 6315, 6316	Contig4578:88845, Contig567:158584, Contig1098:55658, Contig2747:4686, Contig7056:16684, Contig6564:42959, Contig6564:43028, Contig6564:43114
20A	18.762	7	5889, 7618, 7619, 7620, 4769, 4770, 4771	Contig5716:451485, Contig14298:19778, Contig14298:45930, Contig14298:51733, Contig3865:21858, Contig3865:21899, Contig3865:21916
20A	32.247	9	6448, 6451, 2356, 2355, 2354, 2371, 1127, 2271, 2270	Contig6936:51406, Contig6936:117541, Contig1558:249169, Contig1558:244606, Contig1558:193026, Contig1565:252458, Contig802:151302, Contig1493:93516, Contig1493:17817
20A	52.131	13	3268, 1984, 5040, 3900, 3677, 3676, 3675, 3673, 3672, 3671, 6434, 4085, 4084	Contig2303:47133, Contig1354:168466, Contig4337:43087, Contig2965:71538, Contig2703:942081, Contig2703:731455, Contig2703:731426, Contig2703:674910, Contig2703:674884, Contig2703:275327, Contig6913:47333, Contig3122:479787, Contig3122:479777
20A	55.84	4	6909, 6821, 6777, 6776	Contig8785:260483, Contig8246:336667, Contig8099:141928, Contig8099:76922
20A	63.082	6	5831, 5544, 5545, 5546, 7011, 3955	Contig5560:205703, Contig4929:29101, Contig4929:29102, Contig4930:203757, Contig9171:2741, Contig3014:54306
20A	68.9193	8	7109, 7110, 3953, 3954, 265, 264, 263, 262	Contig9698:84507, Contig9698:84524, Contig3013:73732, Contig3013:73817, Contig156:136119, Contig156:136107, Contig156:136003, Contig156:135998
20A	79.917	4	7153, 7152, 7151, 7150	Contig9957:49204, Contig9957:49174, Contig9957:49150, Contig9957:49142
20B	2.46586	14	1697, 4688, 4687, 722, 4692, 4691, 4690, 4689, 7076, 5229, 3809, 4493, 6240, 2372	Contig1163:287722, Contig3780:26371, Contig3780:24538, Contig510:28558, Contig3781:265016, Contig3781:237205, Contig3781:237172, Contig3781:12528, Contig9469:39940, Contig4549:95483, Contig2874:46548, Contig3534:195802, Contig6435:53902, Contig1569:138025
20B	7.045	2	6986, 6987	Contig9091:103205, Contig9091:103208
20B	15.9531	9	6745, 6489, 6488, 3047, 3048, 207, 208, 1108, 6685	Contig7938:92934, Contig7018:38492, Contig7018:38469, Contig2127:35227, Contig2127:205973, Contig123:56650, Contig123:252994, Contig754:46476, Contig7683:215025
20B	21.6771	20	7399, 7398, 7397, 7396, 7345, 7344, 7343, 7342, 7583, 7450, 7451, 7452, 7242, 3961, 3960, 3959, 3958, 3957, 3956, 5336	Contig11467:86838, Contig11467:86792, Contig11467:86773, Contig11467:59856, Contig11088:146989, Contig11088:56535, Contig11088:7868, Contig11088:7836, Contig13707:6652, Contig11928:29132, Contig11928:29218, Contig11928:52443, Contig10294:51476, Contig3016:363501, Contig3016:363421, Contig3016:363363, Contig3016:361618, Contig3016:139080, Contig3016:136408, Contig4686:171976
20B	25.4068	15	3611, 3612, 3616, 3617, 3618, 3619, 3620, 3621, 3622, 5151, 5152, 133, 132, 131, 130	Contig2642:5783, Contig2642:5802, Contig2642:71148, Contig2642:71248, Contig2642:71273, Contig2642:71323, Contig2642:92002, Contig2642:92006, Contig2642:111097, Contig4471:26901, Contig4471:26923, Contig109:138452, Contig109:138366, Contig109:93497, Contig109:93381
20B	35.2756	10	128, 2396, 2395, 2385, 2384, 2383, 2382, 2381, 3220, 3219	Contig105:196948, Contig1582:148374, Contig1582:82797, Contig1575:306248, Contig1575:273960, Contig1575:273930, Contig1575:265411, Contig1575:265391, Contig2260:588776, Contig2260:557995
20B	38.5222	10	3218, 3217, 3216, 3215, 3214, 3213, 3212, 3211, 2087, 2088	Contig2260:502035, Contig2260:501971, Contig2260:501970, Contig2260:435104, Contig2260:435021, Contig2260:374426, Contig2260:344735, Contig2260:207036, Contig1409:126907, Contig1409:221357
20B	43.7011	74	2089, 2090, 2091, 2092, 2093, 2094, 2095, 2096, 2097, 2098, 2099, 2100, 2101, 2102, 2103, 2104, 2105, 2106, 2107, 2108, 2109, 2110, 2111, 2112, 5940, 5941, 7477, 5623, 5624, 5625, 5626, 5627, 5628, 2919, 2920, 2921, 2922, 2923, 1920, 1919, 1918, 1916, 1915, 1914, 1913, 1912, 1911, 1910, 1909, 1908, 5519, 5520, 4667, 4666, 4665, 4664, 4660, 4661, 2890, 2891, 2892, 2893, 2894, 2895, 4467, 4468, 122…	Contig1409:398461, Contig1409:398552, Contig1409:648415, Contig1409:712978, Contig1409:712985, Contig1409:885601, Contig1409:904728, Contig1409:953841, Contig1409:953855, Contig1409:1069813, Contig1409:1069830, Contig1409:1123440, Contig1409:1159846, Contig1409:1159887, Contig1409:1169475, Contig1409:1315644, Contig1409:1359441, Contig1409:1359538, Contig1409:1562765, Contig1409:1562816, Contig14…
21A	1.79312	17	6267, 5582, 6501, 6224, 6223, 6144, 1082, 1083, 1084, 6695, 5634, 5633, 6445, 6446, 6447, 4055, 4056	Contig6497:64277, Contig4982:115427, Contig7048:132998, Contig6371:16155, Contig6371:16097, Contig6189:365814, Contig733:510498, Contig733:757381, Contig733:932165, Contig7701:71274, Contig5091:221400, Contig5091:221343, Contig6933:10966, Contig6933:224014, Contig6933:224027, Contig3101:252371, Contig3101:399101
21A	10.135	56	4057, 4058, 4059, 4060, 4061, 4062, 4063, 4064, 4065, 4066, 4067, 4678, 4677, 3036, 3035, 3034, 3033, 3032, 3031, 3030, 3029, 3028, 3027, 3026, 1694, 1693, 1692, 1691, 1690, 1689, 1688, 1687, 1686, 1685, 1684, 1683, 1682, 3648, 3647, 3645, 3644, 5138, 5317, 5318, 5319, 5320, 5321, 5322, 5323, 3773, 6072, 6071, 6069, 6070, 3010, 3009	Contig3101:701795, Contig3101:701896, Contig3101:791795, Contig3101:843842, Contig3101:843945, Contig3101:843953, Contig3101:867962, Contig3101:869692, Contig3101:872097, Contig3101:872138, Contig3101:877980, Contig3768:128997, Contig3768:128949, Contig2122:528534, Contig2122:528513, Contig2122:350574, Contig2122:350555, Contig2122:233806, Contig2122:231399, Contig2122:231365, Contig2122:231352, …
21A	32.1103	6	3008, 58, 57, 56, 55, 54	Contig2099:43284, Contig43:3956625, Contig43:3956583, Contig43:3956513, Contig43:3535860, Contig43:1903911
21A	40.0598	9	53, 52, 51, 50, 49, 48, 6213, 1831, 5888	Contig43:1903842, Contig43:1399195, Contig43:1399098, Contig43:1332795, Contig43:1125887, Contig43:649709, Contig6352:12560, Contig1241:393428, Contig5713:66633
21A	46.0058	5	4602, 7014, 1177, 4006, 4005	Contig3630:107843, Contig9197:185951, Contig826:15243, Contig3052:78961, Contig3052:78934
21B	0.1776	10	2450, 2451, 2452, 2453, 2454, 2455, 2456, 2457, 2439, 551	Contig1630:38829, Contig1630:40908, Contig1630:40922, Contig1630:40976, Contig1630:449139, Contig1630:480996, Contig1630:502838, Contig1630:506817, Contig1607:212163, Contig383:395321
21B	12.536	7	552, 553, 554, 555, 556, 557, 558	Contig383:570153, Contig383:573476, Contig383:580220, Contig383:1430808, Contig383:1820785, Contig383:1820795, Contig383:1820798
21B	19.7206	5	559, 560, 561, 562, 6125	Contig383:2323931, Contig383:2631071, Contig383:2763831, Contig383:2763916, Contig6174:5485
21B	33.6726	87	171, 172, 173, 174, 175, 176, 177, 178, 179, 180, 181, 182, 183, 184, 185, 186, 1729, 1730, 1731, 1732, 7132, 7131, 7130, 7129, 7128, 7127, 7126, 668, 669, 670, 671, 672, 673, 674, 675, 676, 677, 1938, 1939, 1940, 1941, 1942, 1943, 7319, 3993, 3994, 4000, 3999, 3998, 3997, 3996, 3995, 4002, 4001, 3988, 3989, 3990, 3991, 5925, 3731, 3730, 3729, 3728, 5588, 5589, 5590, 7655, 7558, 4889, 5569, 4630,…	Contig120:860471, Contig120:941160, Contig120:941282, Contig120:964518, Contig120:964538, Contig120:1182481, Contig120:1182490, Contig120:1182531, Contig120:1190385, Contig120:1232315, Contig120:1232330, Contig120:1232394, Contig120:1362770, Contig120:1386965, Contig120:1404906, Contig120:1447236, Contig1184:283438, Contig1184:552858, Contig1184:552985, Contig1184:552990, Contig9876:83556, Contig…
21B	37.8296	10	1863, 1864, 1865, 1866, 1867, 1868, 1869, 6801, 1583, 1582	Contig1261:124216, Contig1261:124221, Contig1261:168237, Contig1261:168267, Contig1261:168290, Contig1261:214270, Contig1261:779917, Contig8158:11986, Contig1102:84180, Contig1102:84115
21B	45.699	19	1580, 1579, 6364, 6365, 102, 103, 104, 105, 106, 107, 2816, 2817, 2818, 2819, 2826, 2827, 2828, 2829, 2830	Contig1102:671, Contig1102:651, Contig6686:63507, Contig6686:63544, Contig92:99550, Contig92:177905, Contig92:219689, Contig92:231766, Contig92:231784, Contig92:533444, Contig1911:241484, Contig1911:473124, Contig1911:586334, Contig1911:595409, Contig1911:766478, Contig1911:771230, Contig1911:771241, Contig1911:771324, Contig1911:815933
21B	56.4163	13	2831, 3490, 3491, 3492, 3493, 3495, 3496, 3497, 3498, 1814, 1815, 1816, 1817	Contig1911:824079, Contig2463:24794, Contig2463:24798, Contig2463:24835, Contig2463:80802, Contig2463:135400, Contig2463:143655, Contig2463:275490, Contig2463:298194, Contig1235:207423, Contig1235:207535, Contig1235:207536, Contig1235:221485
21B	60.9	9	1818, 1819, 1820, 1821, 1823, 1824, 1825, 1826, 1827	Contig1235:231734, Contig1235:261684, Contig1235:261697, Contig1235:346945, Contig1235:638135, Contig1235:1136740, Contig1235:1643749, Contig1235:1746427, Contig1235:1746534
21B	73.086	27	3534, 5136, 5135, 5134, 7291, 7506, 7038, 7037, 486, 491, 492, 162, 163, 164, 165, 166, 167, 168, 157, 158, 159, 160, 161, 4631, 4632, 4395, 4396	Contig2524:28230, Contig4444:6290, Contig4444:6287, Contig4444:6232, Contig10715:5752, Contig12542:33249, Contig9276:74525, Contig9276:63939, Contig351:268250, Contig351:420174, Contig351:446620, Contig117:36693, Contig117:111432, Contig117:111491, Contig117:111597, Contig117:239133, Contig117:239147, Contig117:239168, Contig116:69702, Contig116:69794, Contig116:93133, Contig116:93163, Contig116:…
22A	0	19	7507, 7500, 6770, 7249, 7250, 2725, 7368, 1012, 1013, 6227, 6226, 6716, 5575, 2460, 2461, 7241, 4790, 4352, 3666	Contig12586:1643, Contig12415:29879, Contig8064:13470, Contig10379:22237, Contig10379:22247, Contig1836:12496, Contig11217:11811, Contig673:29408, Contig673:29450, Contig6384:60042, Contig6384:60003, Contig7814:35082, Contig4978:7260, Contig1639:102195, Contig1639:102289, Contig10286:6341, Contig3903:360, Contig3323:82999, Contig2698:21901
22B	0.0047	10	2441, 2440, 1496, 1495, 1494, 1493, 3703, 5638, 5635, 4900	Contig1614:41842, Contig1614:41841, Contig1045:23366, Contig1045:23361, Contig1045:23348, Contig1045:23301, Contig2739:7940, Contig5094:24861, Contig5093:16279, Contig4097:35228
23A	0	14	5102, 5103, 5104, 5105, 6814, 6815, 6205, 6204, 6203, 6202, 4346, 4345, 4341, 6235	Contig4423:51424, Contig4423:51429, Contig4423:51432, Contig4423:51483, Contig8226:127028, Contig8226:295362, Contig6320:32616, Contig6320:32605, Contig6320:32587, Contig6320:32464, Contig3312:340059, Contig3312:223596, Contig3312:81002, Contig6401:37303
23A	7.874	20	7030, 7029, 7028, 7027, 6738, 3118, 3117, 2235, 2236, 2237, 2238, 2239, 2240, 2241, 2242, 2243, 2244, 2245, 2246, 2247	Contig9251:376108, Contig9251:376102, Contig9251:375967, Contig9251:370221, Contig7879:18300, Contig2169:77721, Contig2169:77688, Contig1482:29254, Contig1482:29281, Contig1482:29327, Contig1482:29332, Contig1482:29333, Contig1482:134390, Contig1482:142428, Contig1482:163524, Contig1482:454528, Contig1482:454559, Contig1482:454633, Contig1482:454638, Contig1482:454657
23A	14.9191	38	2248, 2249, 333, 1802, 1803, 1804, 1805, 1806, 1807, 6239, 5428, 5427, 5426, 5425, 5420, 5419, 2263, 2264, 2265, 2266, 2267, 2269, 2268, 3477, 3476, 3475, 3474, 3473, 3472, 3471, 3470, 3469, 3468, 3467, 3466, 5194, 5195, 5196	Contig1482:454660, Contig1482:492183, Contig247:46937, Contig1226:30757, Contig1226:30873, Contig1226:34458, Contig1226:34468, Contig1226:181413, Contig1226:184021, Contig6432:110205, Contig4825:652456, Contig4825:652449, Contig4825:526626, Contig4825:516374, Contig4825:149568, Contig4825:16812, Contig1491:130199, Contig1491:131737, Contig1491:425391, Contig1491:450114, Contig1491:450152, Contig1…
23A	18.947	9	5197, 5198, 5199, 5200, 5201, 5202, 5203, 5204, 2887	Contig4518:334099, Contig4518:440812, Contig4518:451378, Contig4518:451392, Contig4518:451405, Contig4518:451421, Contig4518:495352, Contig4518:602765, Contig1968:43163
23A	25.37	21	2888, 6894, 6895, 5274, 5275, 5276, 5277, 5278, 5279, 5280, 4646, 4647, 4243, 4242, 7160, 7161, 7162, 7163, 7164, 7165, 325	Contig1968:43252, Contig8678:22754, Contig8678:42962, Contig4610:64066, Contig4610:155753, Contig4610:169855, Contig4610:169894, Contig4610:319460, Contig4610:319556, Contig4610:319562, Contig3733:77298, Contig3733:77301, Contig3222:167726, Contig3222:167593, Contig9966:15763, Contig9966:90304, Contig9966:90305, Contig9966:90331, Contig9966:152768, Contig9966:152865, Contig240:169588
23A	32.427	15	324, 323, 322, 6881, 6880, 6879, 7268, 7267, 7266, 7265, 7264, 5259, 5260, 5261, 5262	Contig240:152961, Contig240:113194, Contig240:39966, Contig8600:256475, Contig8600:256378, Contig8600:173147, Contig10498:74812, Contig10498:74779, Contig10498:74751, Contig10498:74677, Contig10498:74657, Contig4582:73596, Contig4582:75681, Contig4582:89002, Contig4582:114999
23A	47.472	6	5263, 5264, 5265, 3915, 3916, 3917	Contig4582:257116, Contig4582:257138, Contig4582:278540, Contig2972:104347, Contig2972:131011, Contig2972:131061
23A	51.26	7	3918, 4209, 4210, 3872, 3873, 7366, 7365	Contig2972:131063, Contig3172:51026, Contig3172:51083, Contig2924:25489, Contig2924:25561, Contig11174:143469, Contig11174:7970
23A	59.895	1	6269	Contig6510:71858
23A	62.332	25	5350, 5351, 6097, 6096, 3723, 3722, 3721, 3720, 3719, 3718, 3715, 3714, 3713, 6256, 1337, 1336, 1335, 7574, 7573, 5742, 5741, 5740, 5739, 5738, 5737	Contig4724:59738, Contig4724:59842, Contig6094:92261, Contig6094:80907, Contig2754:397760, Contig2754:397637, Contig2754:397635, Contig2754:397613, Contig2754:397587, Contig2754:377040, Contig2754:143709, Contig2754:128614, Contig2754:128531, Contig6467:116757, Contig935:40257, Contig935:40217, Contig935:27051, Contig13473:5285, Contig13473:5264, Contig5336:466870, Contig5336:456507, Contig5336:4…
23B	0	18	244, 245, 246, 2657, 2656, 7275, 7274, 7273, 5157, 1349, 2655, 4456, 6063, 6064, 5331, 6493, 6494, 6495	Contig145:485231, Contig145:558659, Contig145:732985, Contig1799:230473, Contig1799:53038, Contig10553:4508, Contig10553:4456, Contig10553:4432, Contig4497:238504, Contig962:43048, Contig1798:52301, Contig3435:48067, Contig6029:168297, Contig6029:168450, Contig4683:15053, Contig7031:8177, Contig7031:21010, Contig7031:70960
23B	7.47027	11	7501, 239, 540, 539, 537, 536, 535, 534, 533, 532, 3580	Contig12446:14350, Contig139:632449, Contig371:1453615, Contig371:1062148, Contig371:678756, Contig371:665743, Contig371:665719, Contig371:665680, Contig371:365865, Contig371:353073, Contig2616:21624
23B	17.3894	8	3581, 2501, 2500, 2499, 2498, 2497, 2496, 1232	Contig2616:311420, Contig1680:459837, Contig1680:371220, Contig1680:371192, Contig1680:371191, Contig1680:371190, Contig1680:253346, Contig865:252327
23B	20.709	17	3862, 3863, 3864, 3865, 3866, 3867, 6009, 6010, 6011, 6012, 6013, 3244, 3243, 3242, 3241, 3240, 3239	Contig2912:129743, Contig2912:287763, Contig2912:287772, Contig2912:330614, Contig2912:384133, Contig2912:488088, Contig5901:262985, Contig5901:270339, Contig5901:299780, Contig5901:351948, Contig5901:352043, Contig2266:534823, Contig2266:350176, Contig2266:342554, Contig2266:342553, Contig2266:342549, Contig2266:69699
23B	39.0063	8	4705, 1614, 4673, 4674, 4941, 4940, 4939, 4938	Contig3827:180934, Contig1113:61817, Contig3751:144813, Contig3751:144962, Contig4166:314320, Contig4166:314267, Contig4166:105990, Contig4166:105963
24A	0	2	2281, 3904	Contig1502:396406, Contig2966:22413
24A	7.57	6	6662, 6661, 6660, 6659, 6658, 6657	Contig7596:762439, Contig7596:762402, Contig7596:762390, Contig7596:439978, Contig7596:439940, Contig7596:439848
24A	17.6892	5	866, 865, 5603, 5602, 4465	Contig607:45664, Contig607:45659, Contig5046:305325, Contig5046:98641, Contig3454:57680
24A	82.686	2	227, 226	Contig133:227452, Contig133:178693
24A	98.466	18	5273, 5272, 5271, 5270, 5268, 3487, 3486, 3485, 3484, 3483, 4380, 4381, 4858, 4859, 4860, 6171, 7235, 7234	Contig4592:414837, Contig4592:414819, Contig4592:414815, Contig4592:414735, Contig4592:187002, Contig2462:239317, Contig2462:239295, Contig2462:239292, Contig2462:33453, Contig2462:33346, Contig3353:145805, Contig3353:145841, Contig4025:124327, Contig4025:124349, Contig4025:124459, Contig6217:16670, Contig10246:119256, Contig10246:119164
24A	110.516	9	7233, 7232, 6058, 6059, 6060, 7184, 6713, 6714, 6715	Contig10246:107441, Contig10246:79357, Contig5985:186630, Contig5985:187263, Contig5985:196190, Contig10038:30076, Contig7806:15477, Contig7806:15478, Contig7806:15480
24A	122.807	15	1551, 3579, 3801, 3802, 3803, 3804, 6509, 6508, 6507, 6506, 6505, 2944, 795, 5830, 5308	Contig1088:52352, Contig2614:269106, Contig2861:401804, Contig2861:599901, Contig2861:670602, Contig2861:835432, Contig7071:546805, Contig7071:357283, Contig7071:321712, Contig7071:321643, Contig7071:316745, Contig2035:611745, Contig554:305147, Contig5559:156697, Contig4636:200353
24B	0.00166667	12	4768, 4614, 7078, 7077, 5586, 5585, 7003, 1740, 1739, 1738, 1736, 1735	Contig3861:192489, Contig3674:131404, Contig9477:81279, Contig9477:81237, Contig5007:94306, Contig5007:94280, Contig9147:14631, Contig1193:297576, Contig1193:269649, Contig1193:269637, Contig1193:227750, Contig1193:227648
24B	25.353	2	3860, 611	Contig2892:134303, Contig423:80397
24B	33.8336	10	2628, 2627, 2624, 2623, 2622, 1228, 1229, 1230, 1231, 1227	Contig1777:1619000, Contig1777:1618960, Contig1777:503117, Contig1777:423619, Contig1777:203953, Contig864:399760, Contig864:399773, Contig864:414035, Contig864:595253, Contig863:97872
24B	40.5083	12	6653, 3657, 3656, 3655, 5758, 6588, 1462, 1463, 1464, 3924, 2897, 2896	Contig7570:156911, Contig2682:27350, Contig2682:27328, Contig2682:27303, Contig5372:408941, Contig7373:166422, Contig1013:196689, Contig1013:196816, Contig1013:276376, Contig2987:175756, Contig1988:223349, Contig1988:223342
25A	0	6	3325, 3326, 4613, 70, 4265, 7636	Contig2340:13831, Contig2340:13865, Contig3663:40412, Contig65:26339, Contig3241:10210, Contig14591:4854

## Sheet: Table_S3
Supplementary information of the manuscript entitled "The chromosome-level genome assembly of European grayling reveals aspects of a unique genome evolution process within salmonids" by Sävilammi et al.
Table S3. Transposable elements that differ in their abundance in either European grayling or Atlantic salmon, outside the 95% confidence limit of the abundance of those elements observed to either of the two genomes.
Transposable element name	RepBase				European grayling coverage		Atlantic salmon coverage
	Name	Class	Order	Superfamily	base pairs	% of genome	base pairs	% of genome
seq32_33009262:33015594_+_MGS#LTR/Pao	BEL11-I_DR_1p	ClassI	LTR	Bel-Pao	26718	0	42	0
CATCH3I_DR-like.cGRASP#LTR/Pao	BEL-4_SSa-I	ClassI	LTR	Bel-Pao	0	0	5969	0
Contig104.cGRASP#Unknown	Copia-12_SSa-LTR	ClassI	LTR	Copia	0	0	1267178	0.06
ERV3-1-I_XT-int-like.cGRASP#LTR/ERVL	ERV1-4_Crp-I_3p	ClassI	LTR	ERV	0	0	955	0
Gypsy-33-I_DR-like.cGRASP#LTR/Gypsy	Gypsy-8_SSa-I	ClassI	LTR	Gypsy	0	0	9822	0
L1-2_DR-like.cGRASP#LINE/L1	L1-17_SSa	ClassI	LINE	L1	0	0	10006	0
SSNHEI-like.cGRASP#Unknown	DNA4-1_SSa	ClassII	Unknown	Unknown	0	0	15090	0
DTSsa1-11.cGRASP#DNA/Mariner	DNA4-2_SSa	ClassII	Unknown	Unknown	0	0	853552	0.04
Nhe-52.cGRASP#DNA/Mariner	DNA4-2B_SSa	ClassII	Unknown	Unknown	0	0	16235972	0.72
Nhe-100.cGRASP#DNA/Mariner	DNA4-2C_SSa	ClassII	Unknown	Unknown	0	0	38645670	1.73
Nhe-108.cGRASP#DNA/Mariner	DNA4-8_SSa	ClassII	Unknown	Unknown	0	0	24277741	1.08
hAT-6_XT-like.cGRASP#DNA/hAT-Charlie	hAT-1_SSa	ClassII	TIR	hAT	0	0	10367	0
rnd-6_family-2644#Unknown	hAT-10_DR_1p	ClassII	TIR	hAT	123702	0.01	0	0
rnd-5_family-3537#DNA/PIF-ISL2EU	IS4EU-2_DR1p	ClassII	Unknown	ISL2EU	37185	0	0	0
Tc1-10_Xt-like.cGRASP#DNA/TcMar-Tc1	Mariner-16_SSa	ClassII	TIR	Tc1-Mariner	0	0	325116	0.01
TC1DR1-like.cGRASP#DNA/Tc1	Mariner-20_SSa_1p	ClassII	TIR	Tc1-Mariner	0	0	110281	0
TC2_FR5-like.cGRASP#DNA/Tc2	Mariner-28_SSa_1p	ClassII	TIR	Tc1-Mariner	0	0	1792662	0.08

## Sheet: Table_S4
Supplementary information of the manuscript entitled "The chromosome-level genome assembly of European grayling reveals aspects of a unique genome evolution process within salmonids" by Sävilammi et al.
Table S4: Information about the chromosomal inversions, referred to under block type (column C; also highlighted in cyan color), and the genomic rearrangements (column K) detected between the European grayling and the Atlantic salmon genomes
European grayling chromosome id	Total chromosome length	Block id	Block type	Inversion origin	Type of inversion	Total number of blocks in the chromosome	Start position in European grayling	End position in European grayling	Block length (in base pairs)	Gene number	Genes per megabase pair	rearranged
1A	31711297	1	inverted	European grayling specific	pericentric	2	0	10589042	10589042	387	36.5472	NO
1A	31711297	2	not inverted			2	11117804	31672248	20554444	781	37.9966	NO
1B	33598472	3	not inverted			4	16493	7084996	7068503	316	44.7054	NO
1B	33598472	4	inverted		paracentric	4	8027577	14193185	6165608	204	33.0868	NO
1B	33598472	5	inverted		paracentric	4	14288945	21485603	7196658	325	45.1599	NO
1B	33598472	6	not inverted			4	21906472	33585803	11679331	402	34.4198	NO
2A	39580497	7	full chromosome			1	0	39472733	39472733	1406	35.6195	NO
2B	23618429	8	inverted		paracentric	3	0	11839129	11839129	424	35.8134	NO
2B	23618429	9	unknown			3	12513223	13719252	1206029	53	43.9459	NO
2B	23618429	10	inverted		pericentric	3	14469353	23473684	9004331	255	28.3197	NO
3A	37010381	11	not inverted			3	0	9632850	9632850	443	45.9885	NO
3A	37010381	12	inverted	European grayling specific	paracentric	3	9929033	27650434	17721401	597	33.6881	NO
3A	37010381	13	inverted		paracentric	3	27677258	36996873	9319615	297	31.8683	NO
3B	34063472	14	inverted	European grayling specific	pericentric	3	0	14527755	14527755	479	32.9714	NO
3B	34063472	15	inverted	Pike?	paracentric	3	14612884	19923787	5310903	160	30.1267	NO
3B	34063472	16	not inverted			3	20185791	33986174	13800383	555	40.2163	NO
4A	29258592	17	not inverted			2	0	15111774	15111774	617	40.8291	NO
4A	29258592	18	inverted		pericentric	2	15300310	29231380	13931070	427	30.6509	NO
4B	33018251	19	inverted		pericentric	2	0	11714311	11714311	384	32.7804	NO
4B	33018251	20	not inverted			2	11736242	32989358	21253116	722	33.9715	NO
5A	19586853	21	not inverted			2	0	14408082	14408082	595	41.2963	NO
5A	19586853	22	inverted		pericentric	2	14807145	19391094	4583949	170	37.0859	NO
5B	32952906	23	full chromosome			1	5401180	32925294	27524114	921	33.4616	NO
6A	40191757	24	unknown			3	0	12559621	12559621	424	33.759	NA
6A	40191757	25	unknown			3	13421442	23910120	10488678	311	29.651	NA
6A	40191757	26	unknown			3	24152253	40001032	15848779	428	27.0052	NA
6B	27402262	27	full chromosome			1	0	27362057	27362057	843	30.8091	NO
7A	38766653	28	inverted		pericentric	2	74693	8064511	7989818	203	25.4073	NO
7A	38766653	29	not inverted			2	11495980	38736332	27240352	1048	38.4723	NO
7B	40331435	30	not inverted			2	40884	21310652	21269768	682	32.0643	NO
7B	40331435	31	inverted	Atlantic salmon specific	paracentric	2	21814397	40048377	18233980	710	38.9383	NO
8A	34717018	32	not inverted			2	0	25733152	25733152	886	34.4303	NO
8A	34717018	33	inverted		paracentric	2	25874977	34709539	8834562	236	26.7133	NO
8B	40237083	34	not inverted			2	0	18062334	18062334	598	33.1076	NO
8B	40237083	35	inverted	European grayling specific	pericentric	2	18414022	40116172	21702150	690	31.7941	NO
9A	8327715	36	full chromosome			1	0	8270201	8270201	487	58.8861	NO
9B	8230926	37	full chromosome			1	0	8180509	8180509	446	54.5198	NO
10A	29060487	38	inverted		pericentric	2	0	5123498	5123498	194	37.8648	NO
10A	29060487	39	not inverted			2	5897048	28996622	23099574	890	38.5288	NO
10B	29192016	40	not inverted			3	0	9153154	9153154	379	41.4065	NO
10B	29192016	41	inverted	European grayling specific	paracentric	3	10810453	16567141	5756688	196	34.0474	NO
10B	29192016	42	not inverted			3	16862702	29138741	12276039	448	36.4939	NO
11A	23614990	43	not inverted			4	0	12186452	12186452	564	46.2809	NO
11A	23614990	44	not inverted			4	12307160	15075843	2768683	106	38.2854	YES
11A	23614990	45	inverted		paracentric	4	15321746	19316131	3994385	172	43.0604	YES
11A	23614990	46	not inverted			4	19643083	22362300	2719217	103	37.8786	NO
11B	36207966	47	unknown			2	0	10395594	10395594	444	42.7104	NA
11B	36207966	48	unknown			2	10527603	35970056	25442453	1213	47.6762	NA
12A	35017223	49	not inverted			4	0	2999139	2999139	80	26.6743	NO
12A	35017223	50	inverted		paracentric	4	4512678	16375542	11862864	444	37.4277	NO
12A	35017223	51	inverted		paracentric	4	16792660	28455132	11662472	441	37.8136	NO
12A	35017223	52	not inverted			4	28502314	34851303	6348989	267	42.0539	NO
12B	32865966	53	not inverted			2	0	16072734	16072734	666	41.4366	NO
12B	32865966	54	inverted		pericentric	2	16354315	32603234	16248919	560	34.4638	NO
13A	25563215	55	full chromosome			1	0	25485399	25485399	940	36.8839	NO
13B	35930200	56	inverted		pericentric	4	0	7953956	7953956	334	41.9917	YES
13B	35930200	57	not inverted			4	8531761	16730809	8199048	213	25.9786	YES
13B	35930200	58	inverted	Atlantic salmon specific	paracentric	4	16750966	20100238	3349272	105	31.3501	NO
13B	35930200	59	not inverted			4	20606080	31385697	10779617	412	38.2203	NO
13C	7402266	60	full chromosome			1	0	7287995	7287995	233	31.9704	NO
14A	26006002	61	not inverted			2	0	3910103	3910103	141	36.0604	NO
14A	26006002	62	inverted	European grayling specific		2	4356919	25927159	21570240	760	35.2337	NO
14B	32114484	63	not inverted			3	0	13412966	13412966	641	47.7896	NO
14B	32114484	64	inverted		unresolved	3	13750569	25256186	11505617	343	29.8115	NO
14B	32114484	65	inverted		unresolved	3	25541146	32016100	6474954	249	38.4559	NO
15A	34557991	66	not inverted			2	0	24445530	24445530	886	36.2438	NO
15A	34557991	67	inverted		paracentric	2	24595265	34483901	9888636	249	25.1804	NO
15B	35791600	68	not inverted			3	3242711	21841520	18598809	599	32.2064	YES
15B	35791600	69	inverted		paracentric	3	23041961	27329817	4287856	151	35.2157	YES
15B	35791600	70	not inverted			3	29587553	35722130	6134577	272	44.3388	NO
16A	39707183	71	inverted		pericentric	2	31094	11624051	11592957	276	23.8076	NO
16A	39707183	72	not inverted			2	11844176	39681241	27837065	913	32.798	NO
16B	36260421	73	inverted		paracentric	5	0	4472893	4472893	159	35.5475	NO
16B	36260421	74	inverted		paracentric	5	7151784	11887473	4735689	193	40.7544	NO
16B	36260421	75	not inverted			5	11912909	21251678	9338769	303	32.4454	NO
16B	36260421	76	inverted		unresolved	5	21718057	31452423	9734366	302	31.0241	NO
16B	36260421	77	inverted		unresolved	5	32229813	36126067	3896254	112	28.7456	NO
17A	41090972	78	inverted		unresolved	3	0	4147308	4147308	140	33.7568	NO
17A	41090972	79	inverted		unresolved	3	4291682	20296201	16004519	565	35.3025	NO
17A	41090972	80	not inverted			3	21512157	41058744	19546587	696	35.6072	NO
17B	44100497	81	not inverted			2	78582	34325327	34246745	1182	34.5142	NO
17B	44100497	82	inverted		pericentric	2	34771545	43648980	8877435	295	33.2303	NO
18A	32090924	83	not inverted			3	25361	13612536	13587175	534	39.3018	NO
18A	32090924	84	inverted	Atlantic salmon specific	unresolved	3	15559891	28792253	13232362	411	31.0602	NO
18A	32090924	85	not inverted			3	30423676	32013791	1590115	57	35.8465	NO
18B	30355092	86	inverted	Pike?	pericentric	2	0	17624862	17624862	612	34.7237	NO
18B	30355092	87	not inverted			2	17730711	30349743	12619032	453	35.8982	NO
19A	44988017	88	inverted		paracentric	4	0	17669008	17669008	640	36.2216	NO
19A	44988017	89	inverted		paracentric	4	17694472	28986692	11292220	368	32.5888	NO
19A	44988017	90	inverted		unresolved	4	29418219	39700766	10282547	295	28.6894	NO
19A	44988017	91	not inverted			4	39792951	44571084	4778133	133	27.8351	NO
19B	32985317	92.1	not inverted			3	0	16208278	16208278	455	28.0721	NO
19B	32985317	92.2	not inverted			3	16977714	28391815	11414101	445	38.9869	YES
19B	32985317	93	not inverted			3	28520361	32823166	4302805	140	32.5369	YES
20A	25720501	94	not inverted			5	244126	6682452	6438326	387	60.1088	NO
20A	25720501	95	inverted		paracentric	5	7247212	11550577	4303365	220	51.1228	NO
20A	25720501	96	inverted		paracentric	5	11663056	19271017	7607961	332	43.6385	NO
20A	25720501	97	not inverted			5	19384277	19968807	584530	32	54.7448	NO
20A	25720501	98	inverted		pericentric	5	20038839	25652581	5613742	174	30.9954	NO
20B	31447095	99	full chromosome			1	0	31272936	31272936	1466	46.8776	NO
21A	27703283	100	full chromosome			1	0	27640333	27640333	822	29.7391	NO
21B	30422608	101	not inverted			5	0	3194242	3194242	116	36.3153	NO
21B	30422608	102	inverted		paracentric	5	6818068	14827020	8008952	155	19.3533	NO
21B	30422608	103	not inverted			5	14916305	19059154	4142849	134	32.3449	NO
21B	30422608	104	inverted		paracentric	5	19240230	24197162	4956932	189	38.1284	YES
21B	30422608	105	not inverted			5	25967253	30253472	4286219	162	37.7955	YES
22A	12821563	106	full chromosome			1	0	12661454	12661454	625	49.3624	NO
22B	10448289	107	full chromosome			1	0	10382658	10382658	598	57.596	NO
23A	24855866	108	inverted		paracentric	3	0	7988902	7988902	331	41.4325	NO
23A	24855866	109	not inverted			3	8018738	11339287	3320549	121	36.4398	NO
23A	24855866	110	inverted		pericentric	3	11684031	24340254	12656223	436	34.4495	NO
23B	20764677	111	unknown			3	0	8528937	8528937	327	38.3401	NA
23B	20764677	112	unknown			3	8714548	17712000	8997452	317	35.2322	NA
23B	20764677	113	unknown			3	18419292	20647136	2227844	100	44.8864	NA
24A	27354797	114	not inverted			2	7754358	14079848	6325490	240	37.9417	NO
24A	27354797	115	inverted		pericentric	2	14173888	27051724	12877836	428	33.2354	NO
24B	21501505	116	inverted		pericentric	2	0	6539774	6539774	183	27.9826	NO
24B	21501505	117	not inverted			2	6553351	21455642	14902291	587	39.3899	NO
25A	8179806	118	full chromosome			1	0	8105801	8105801	409	50.4577	NO
25B	6483087	119	full chromosome			1	0	6463857	6463857	331	51.2078	NO
					18
					24
				51
