# Supplementary material
Source: publisher figshare collection journal article supplement (https://gsajournals.figshare.com/articles/dataset/_/7728512)
Supplement: Supplementary file 1 [file 2]

Article

**The chromosome-level genome assembly of European grayling reveals aspects of a unique genome evolution process within salmonids**

Tiina Sävilammi<sup>1</sup>, Craig R. Primmer<sup>2,3</sup>, Srinidhi Varadharajan<sup>4</sup>, René Guyomard<sup>5</sup>, Yann Guiguen<sup>6</sup>, Simen R. Sandve<sup>7</sup>, L. Asbjørn Vøllestad<sup>4</sup>, Spiros Papakostas<sup>1\*</sup>, Sigbjørn Lien<sup>7\*</sup>

<sup>1</sup>Department of Biology, University of Turku, 20014 Turku, Finland; <sup>2</sup>Organismal & Evolutionary Biology Research Program Faculty of Biological & Environmental Sciences, 00014, University of Helsinki, Helsinki, Finland; <sup>3</sup>Institute of Biotechnology, 00014, University of Helsinki, Helsinki, Finland; <sup>4</sup>Department of Biology, University of Oslo, 0315 Oslo, Norway; <sup>5</sup>INRA, UMR1313 GABI Génétique Animale et Biologie Intégrative, Domaine de Vilvert, 78352, Jouy-en-Josas Cedex, France; <sup>6</sup>INRA, UR1037 Fish Physiology and Genomics, F-35000, Rennes, France ; <sup>7</sup>Norwegian University of Life Sciences, 1430 Ås, Norway.

\*Correspondence should be addressed to: SL (sigbjorn.lien@nmbu.no) or SP (spiros.papakostas@utu.fi; spiros.papakostas@gmail.com).

Figure S1

Breaks in the progression of map length increase in the salmonised European grayling linkage groups indicated possible genomic rearrangements between the European grayling and Atlantic salmon genomes.

In each chromosome, figures on the left (A) and right (B) describe mapping positions of the RAD markers in the original and salmonised linkage maps, respectively. Gaps larger than 10 map units (blue) or 8 times the gap size standard deviation of the chromosome (red) are highlighted with vertical lines.

A original maps

B Salmonized maps

LG 1

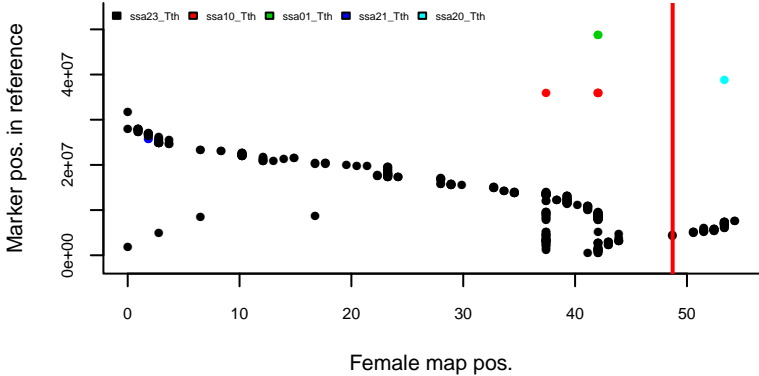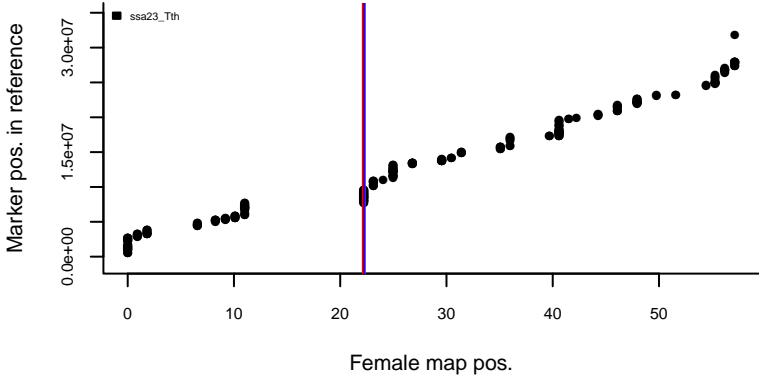

LG 2

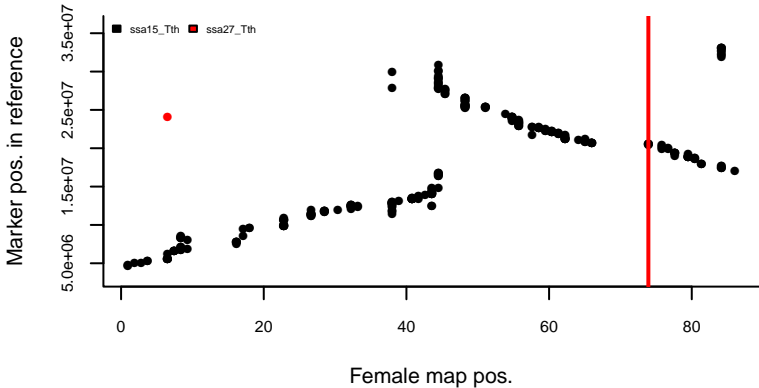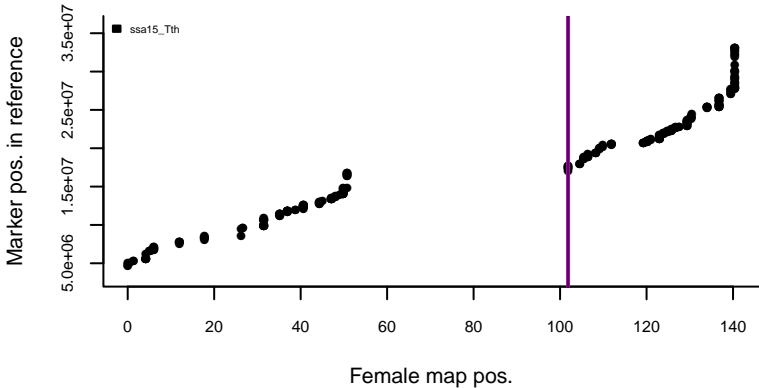

LG 3

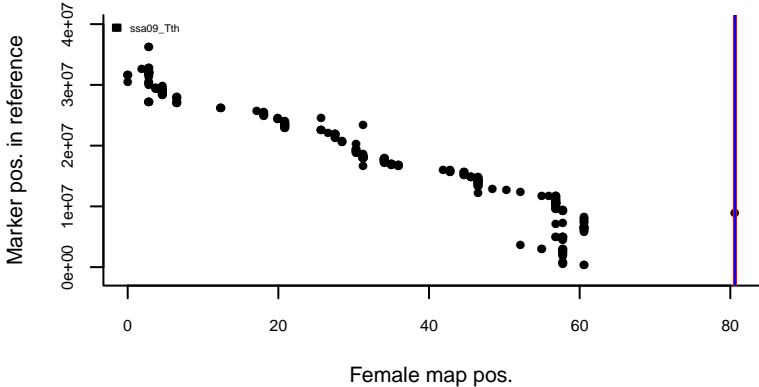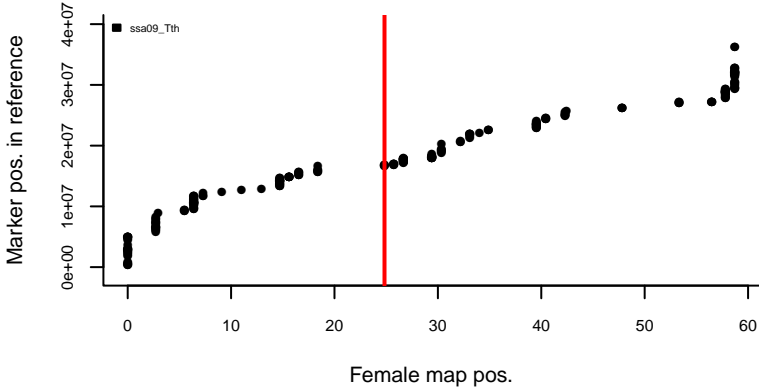

LG 4

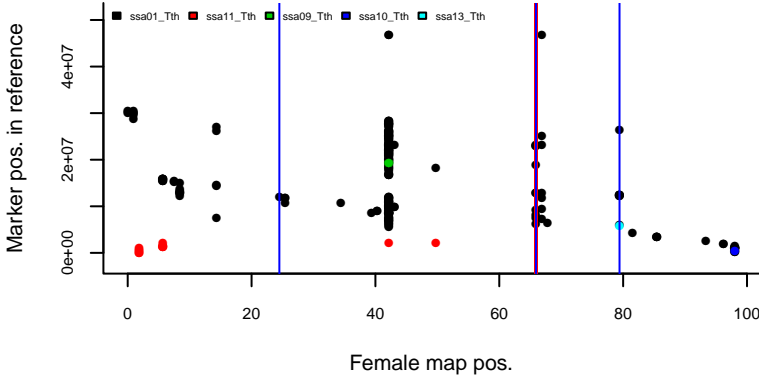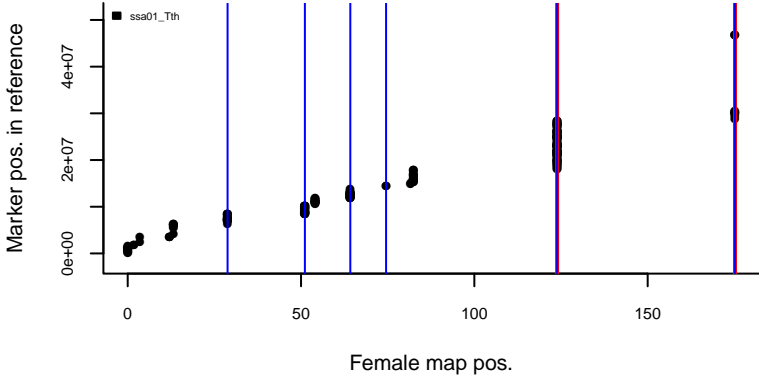

LG 5

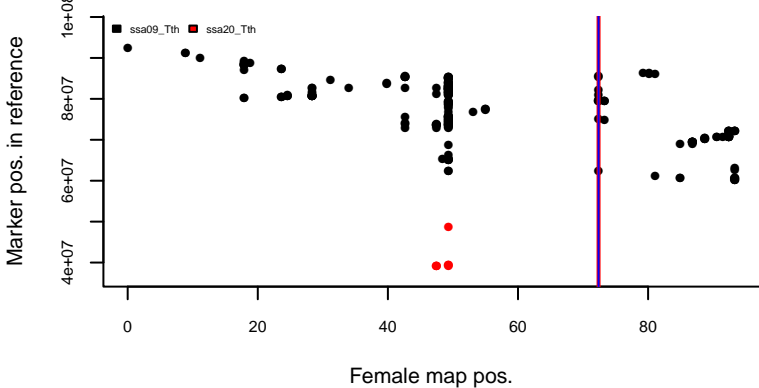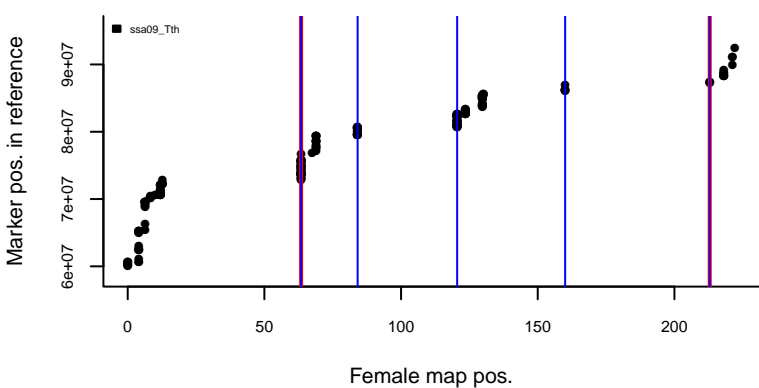

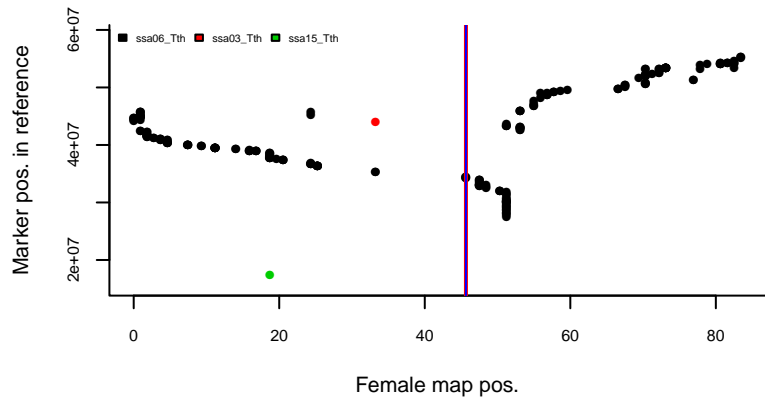

LG 6

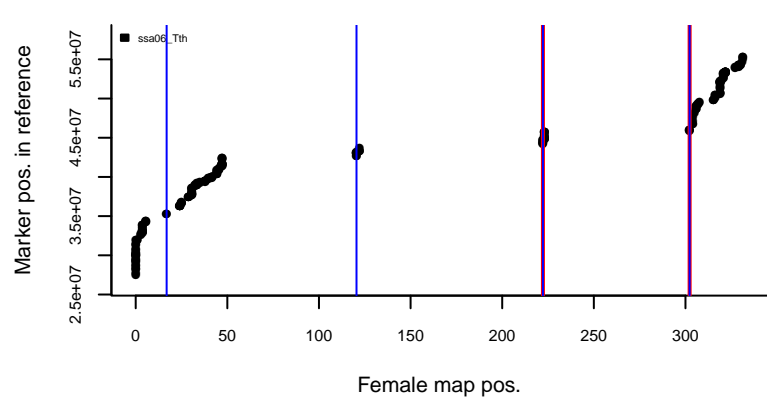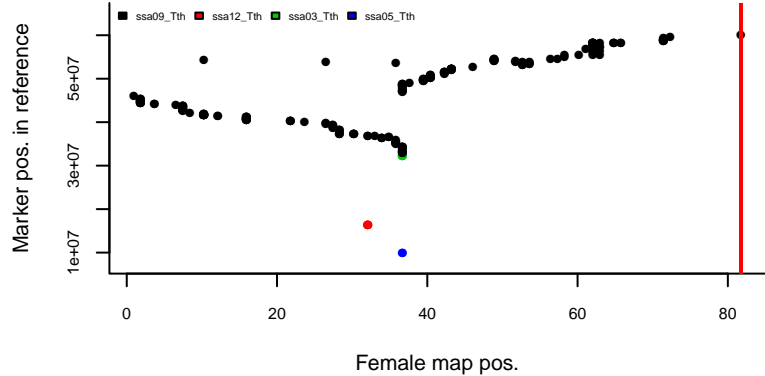

LG 7

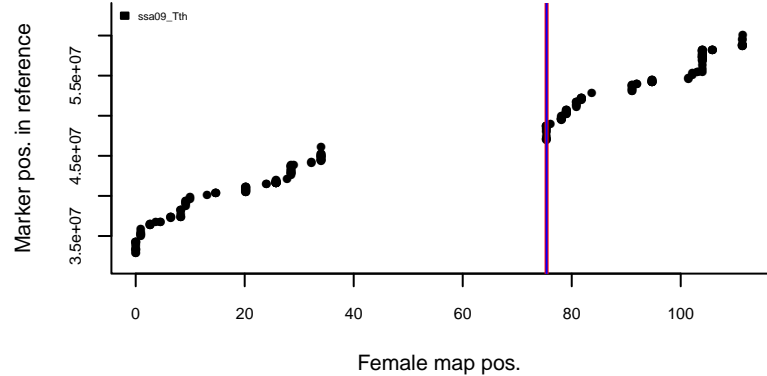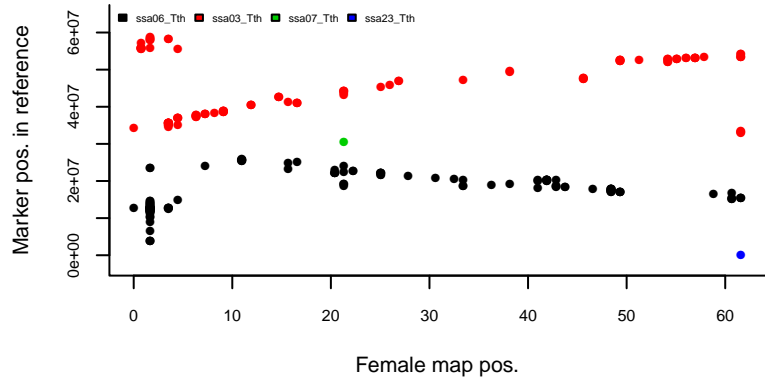

LG 8

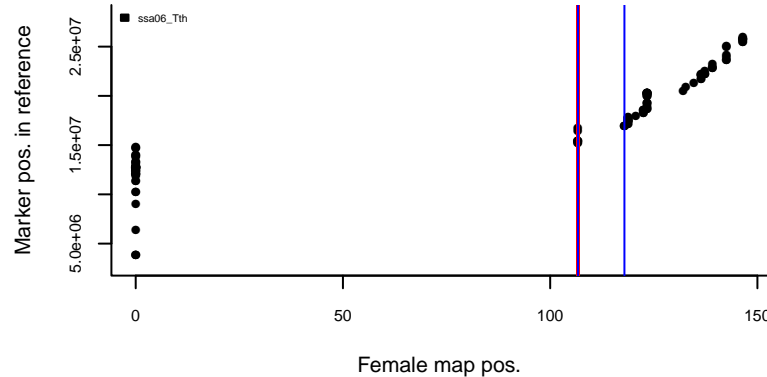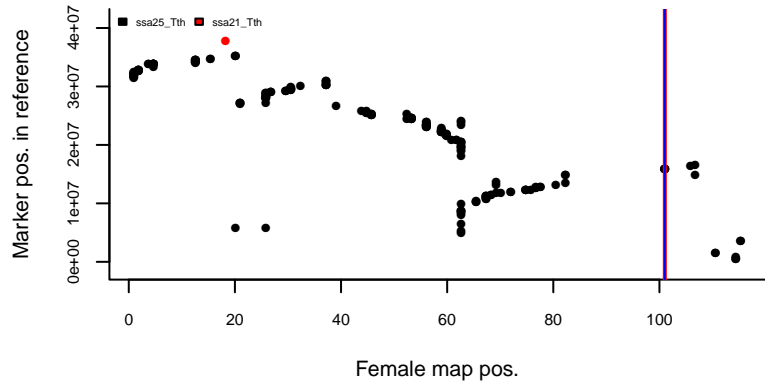

LG 9

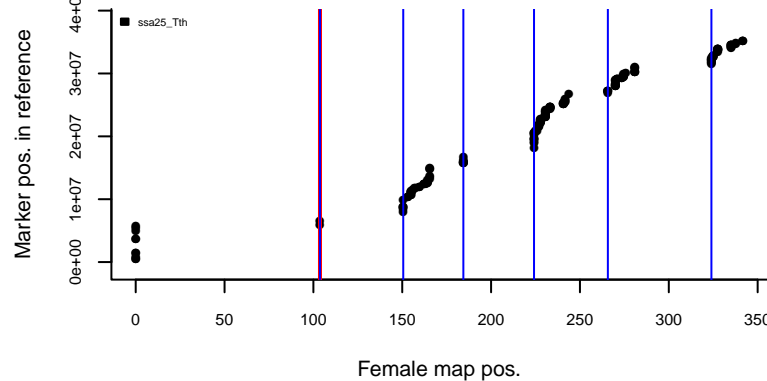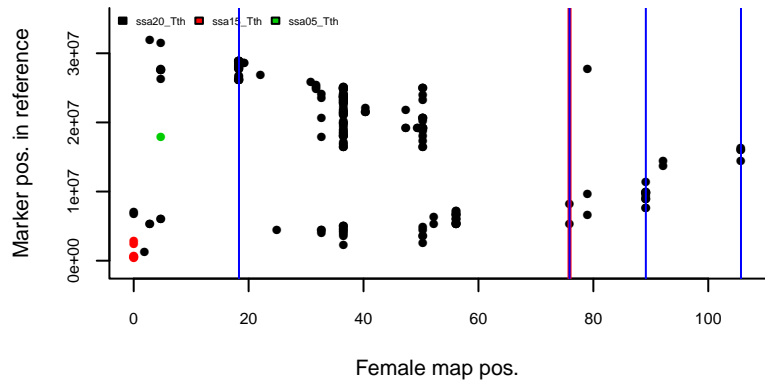

LG 10

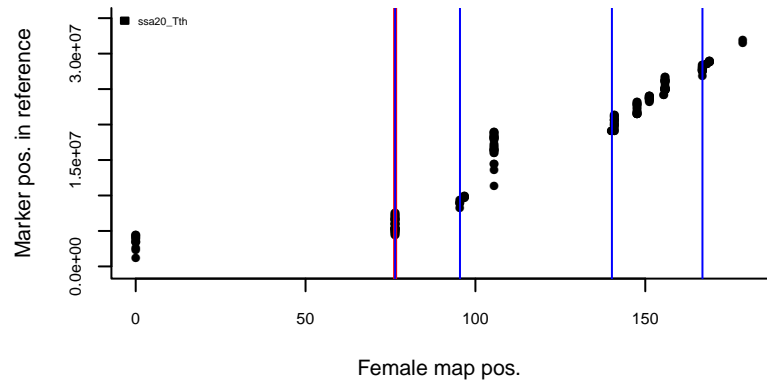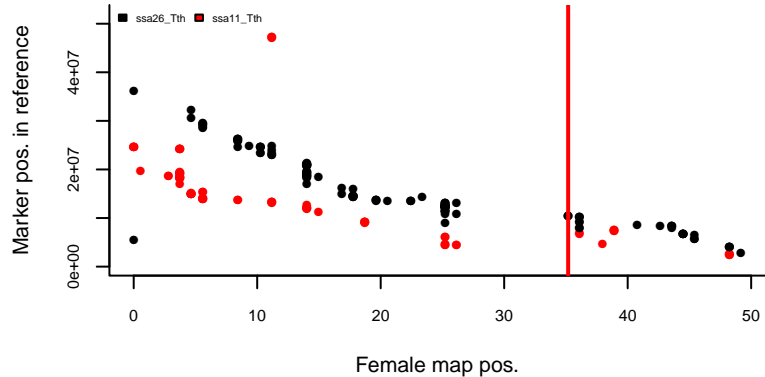

LG 11

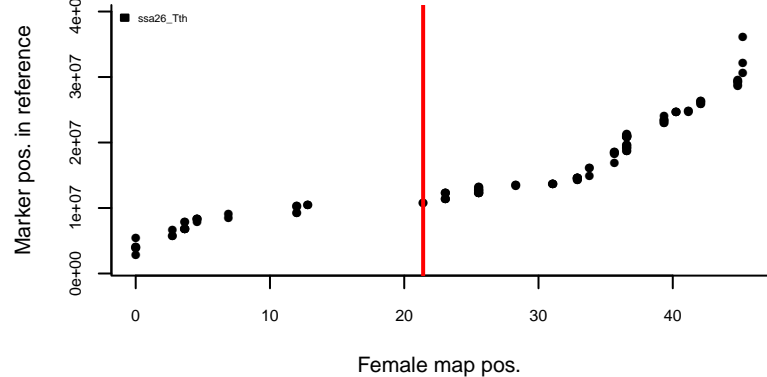

LG 12

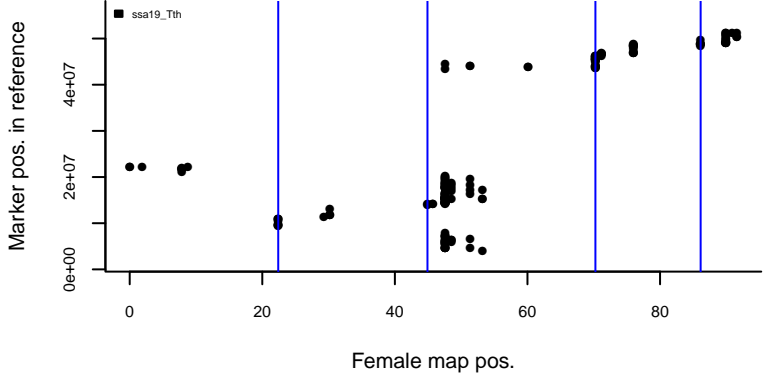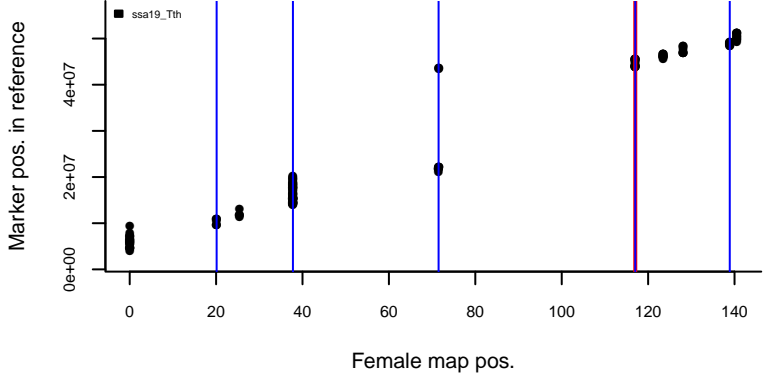

LG 13

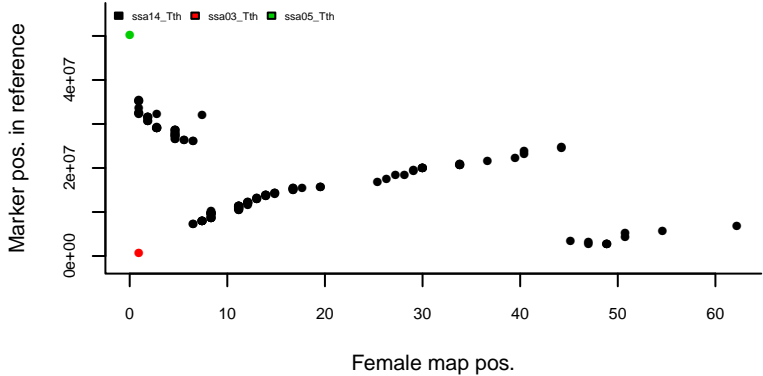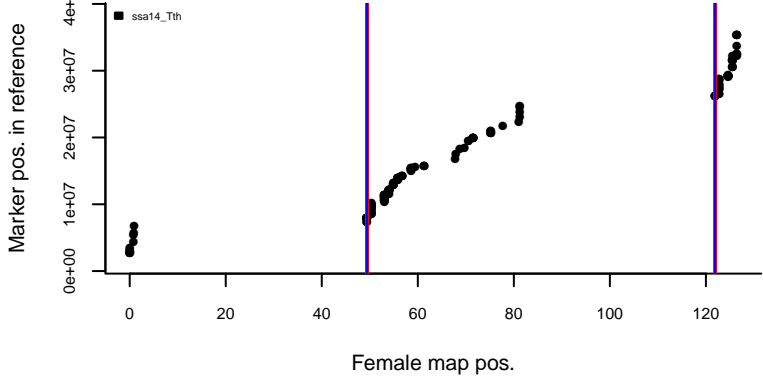

LG 14

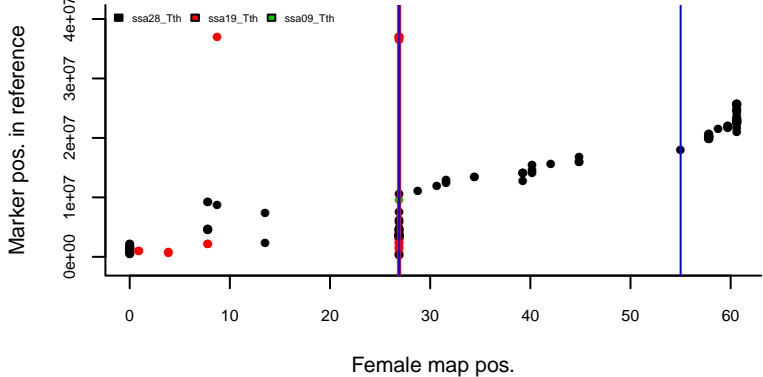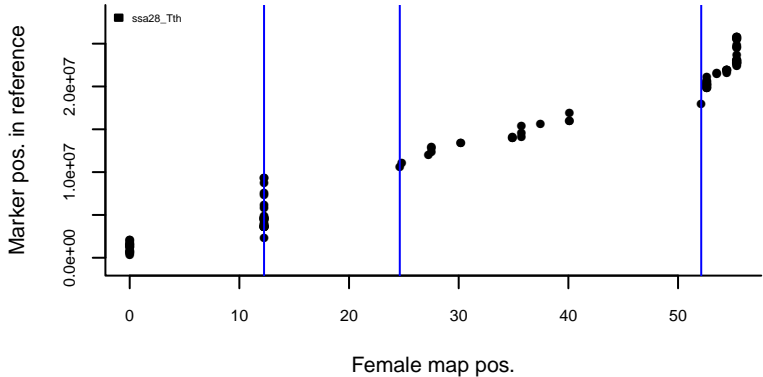

LG 15

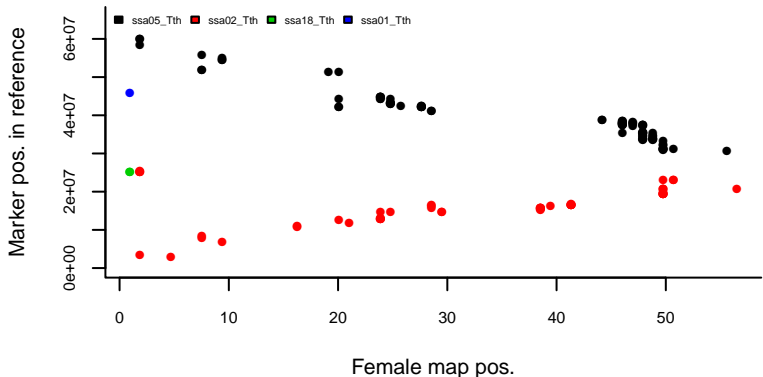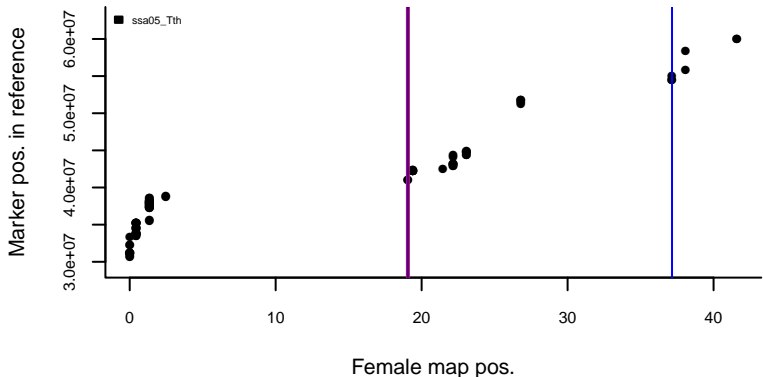

LG 16

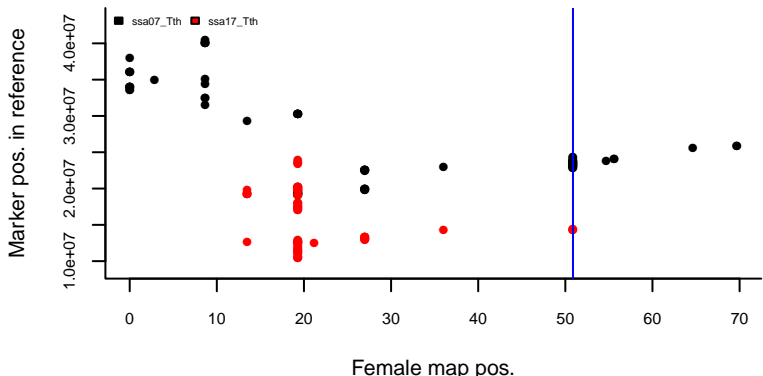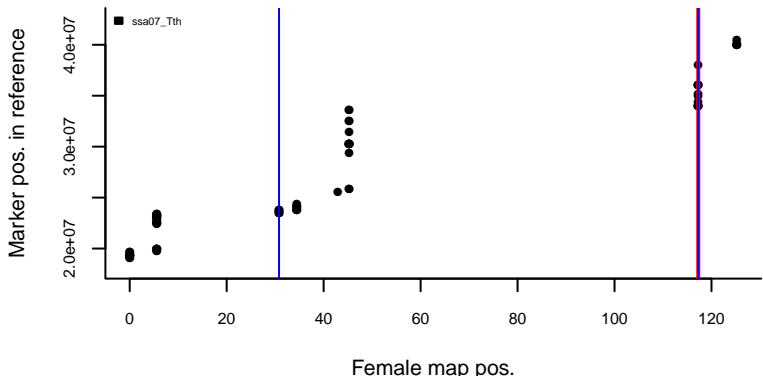

LG 17

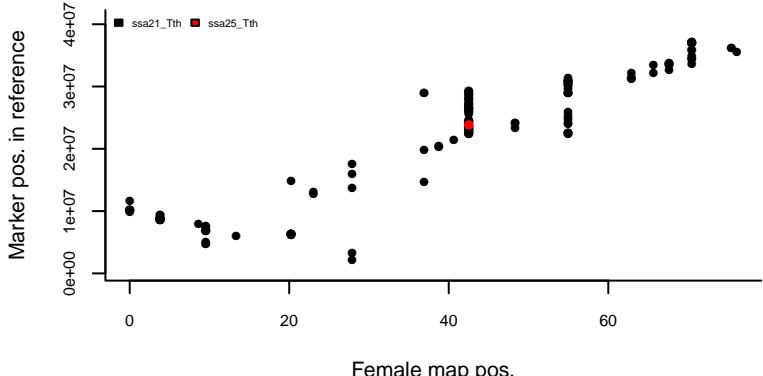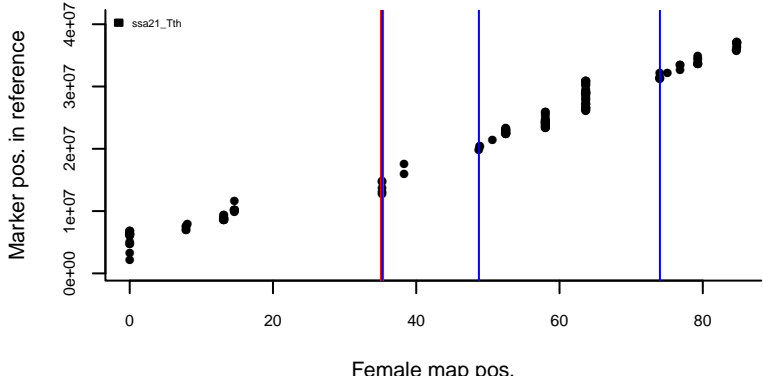

LG 18

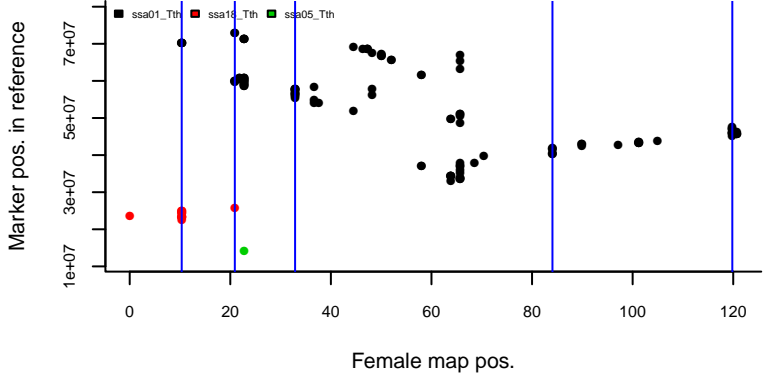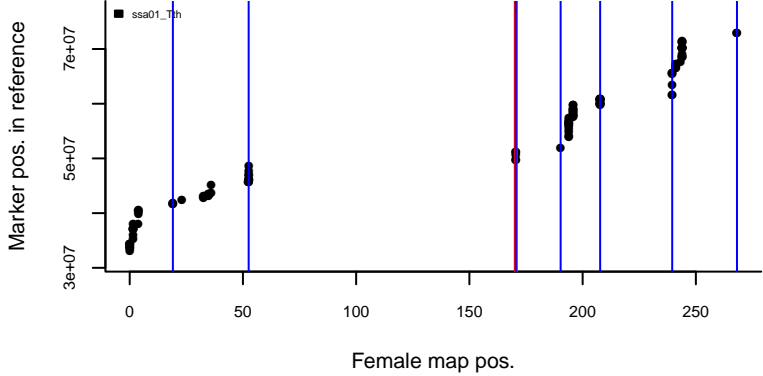

LG 19

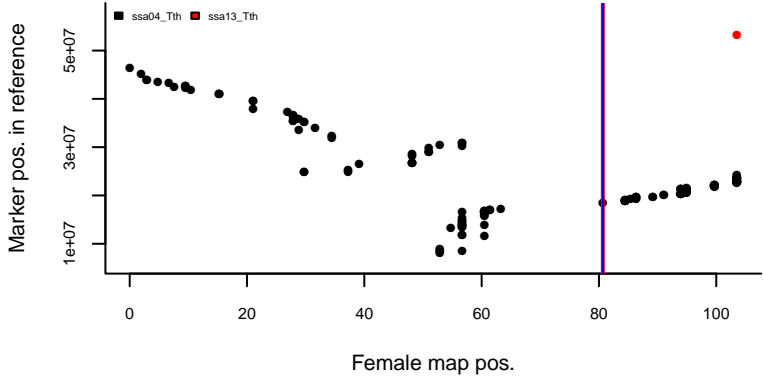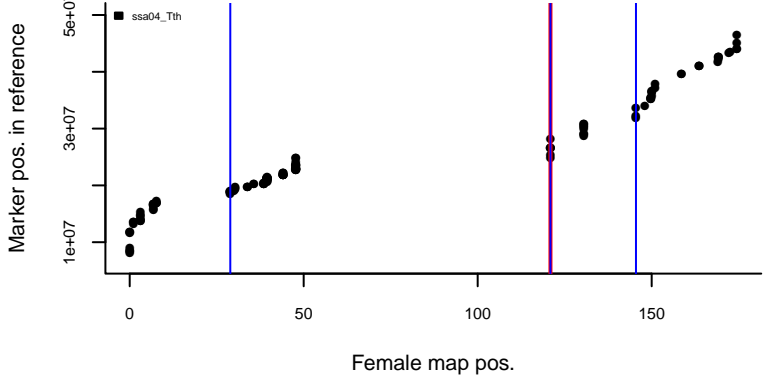

LG 20

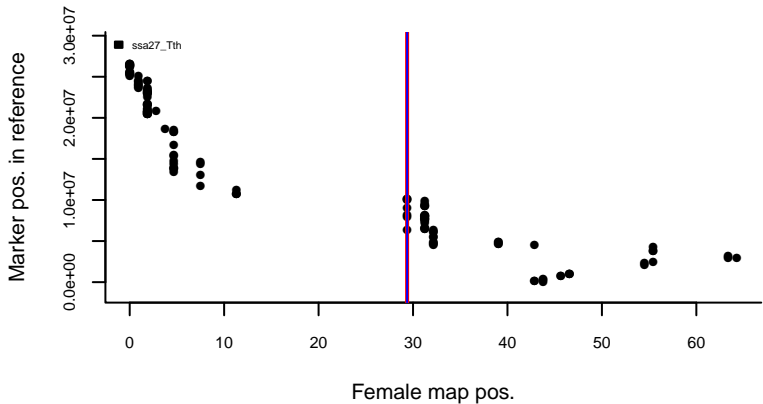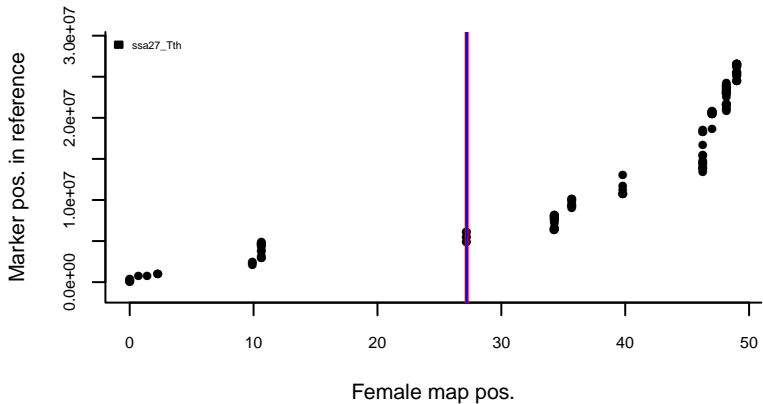

LG 21

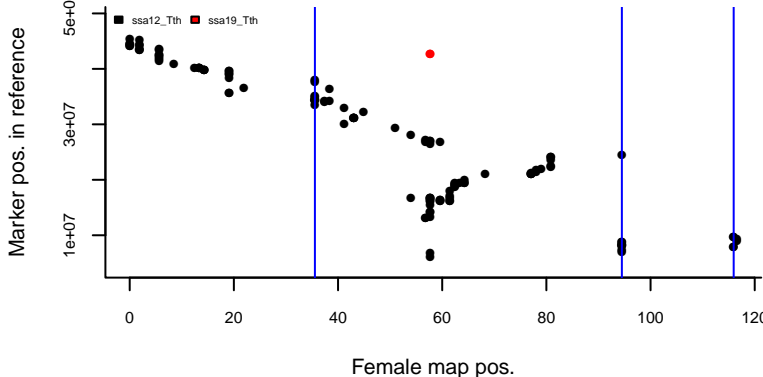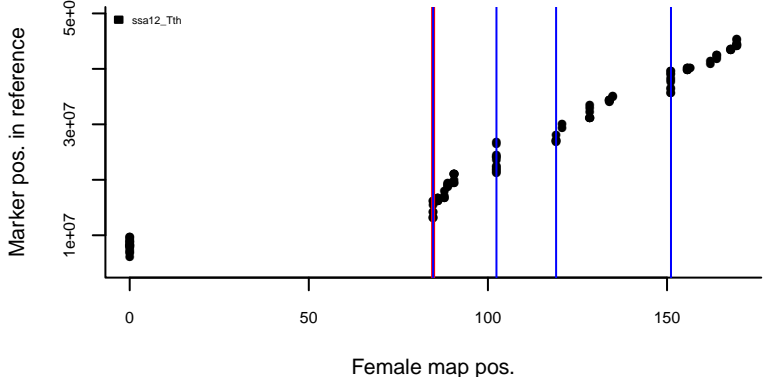

LG 22

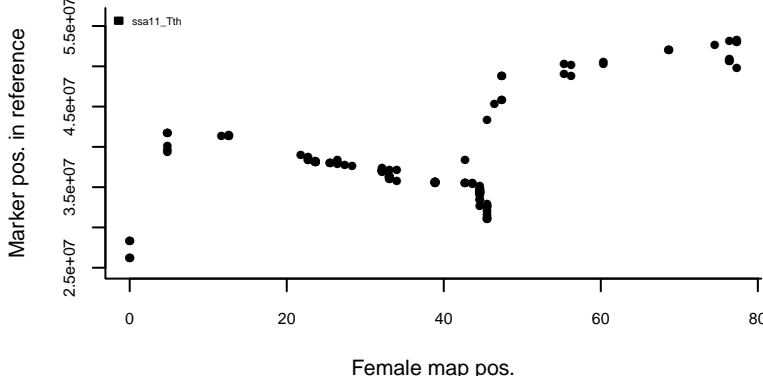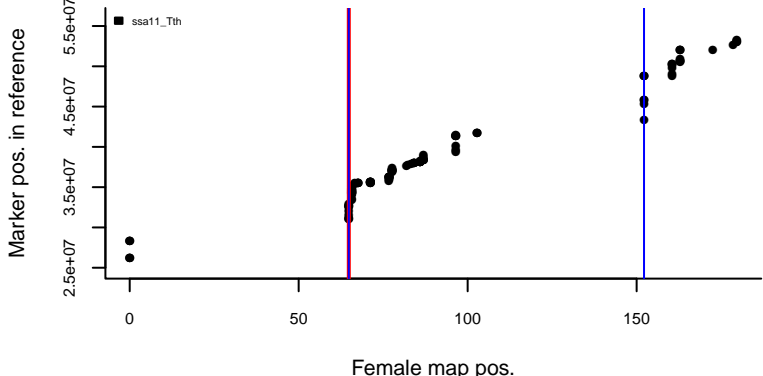

LG 23

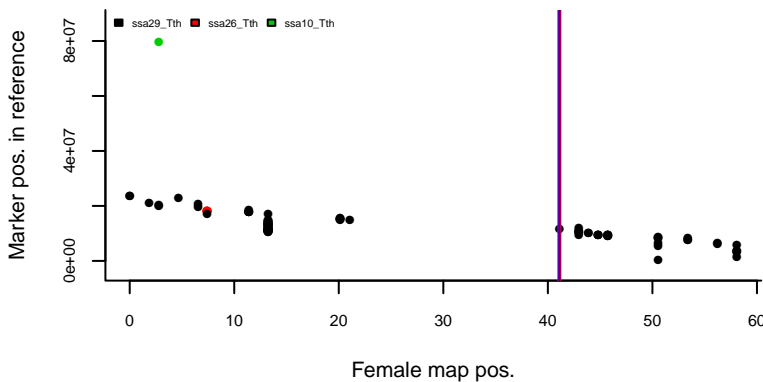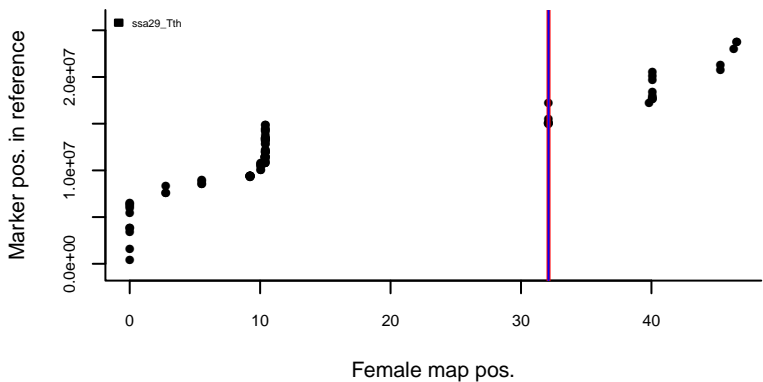

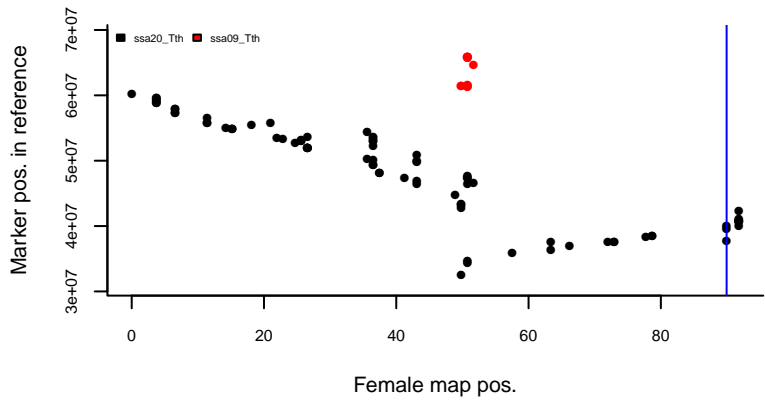

LG 24

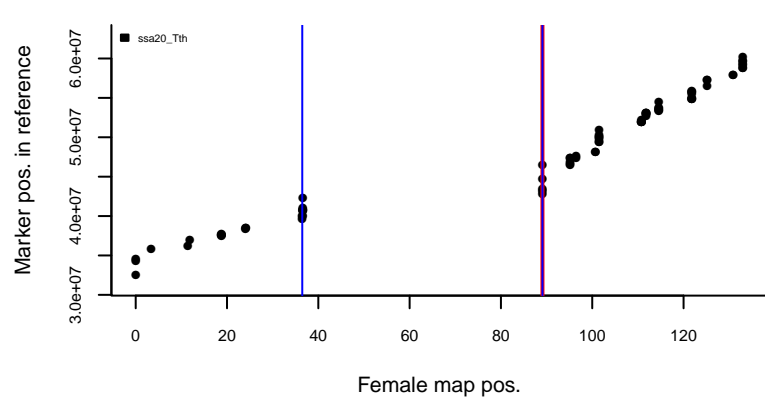

LG 25

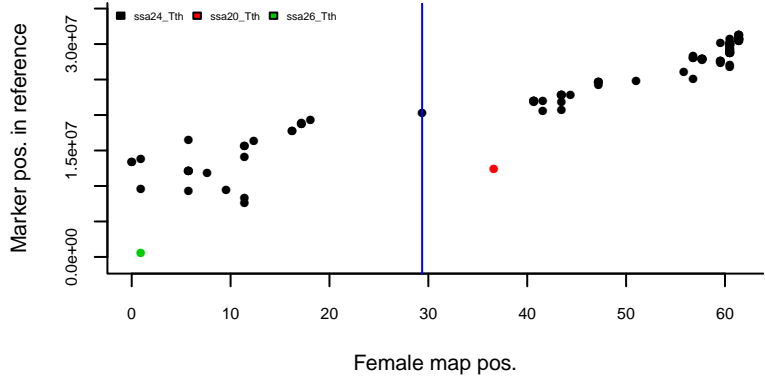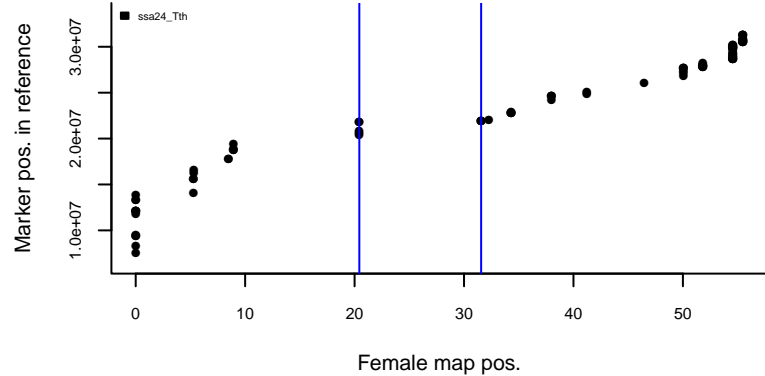

LG 26

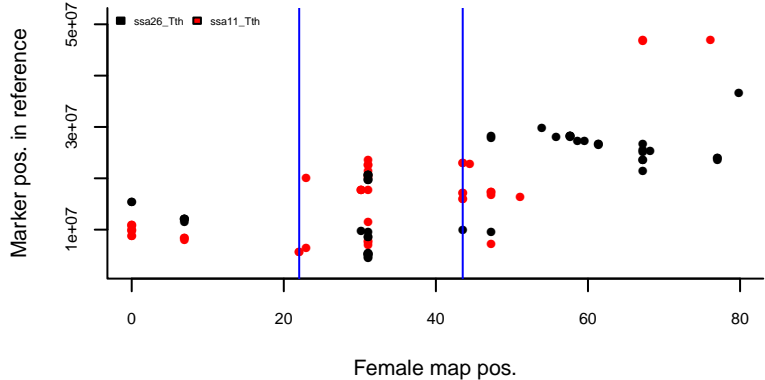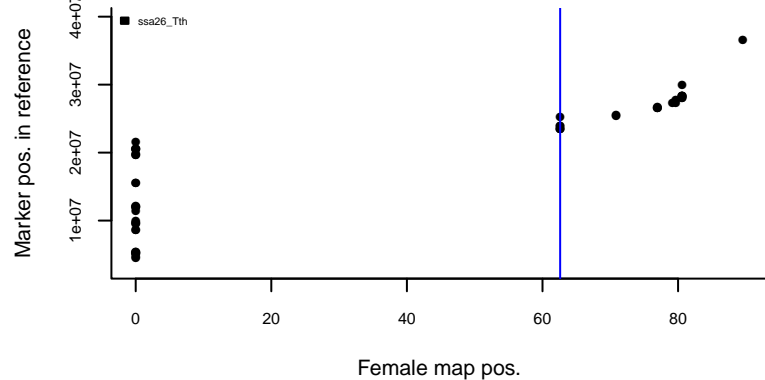

LG 27

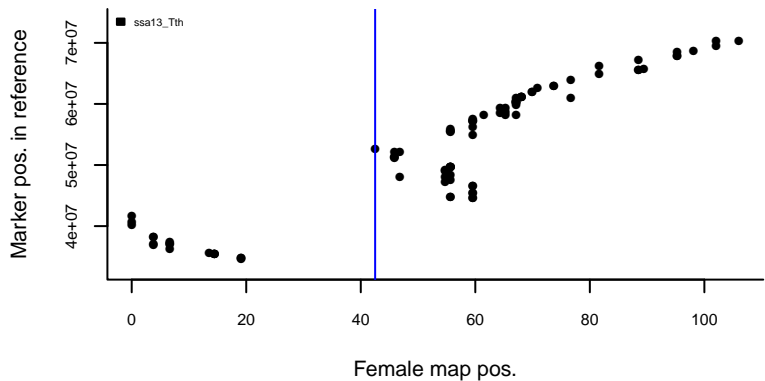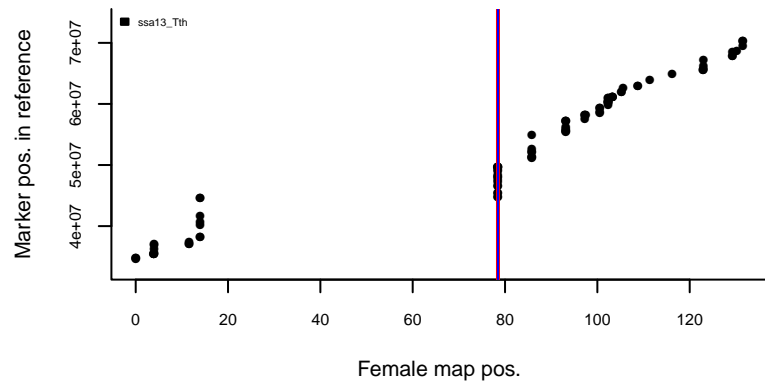

LG 28

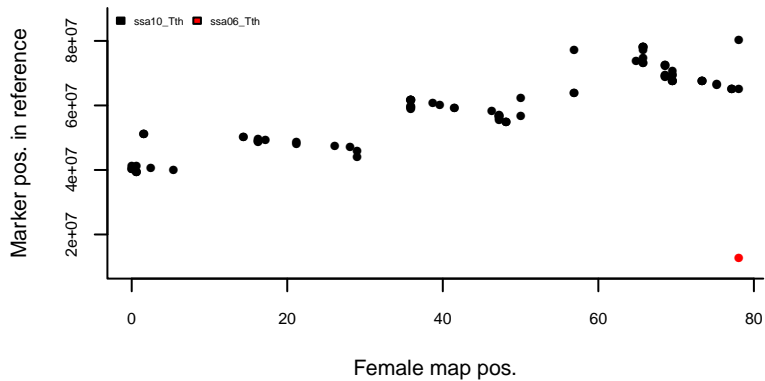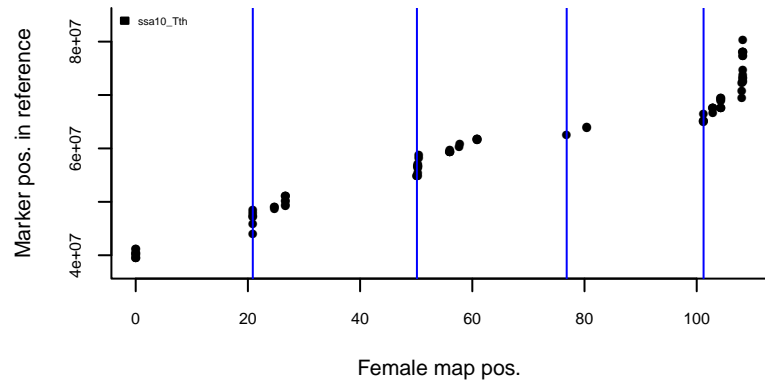

LG 29

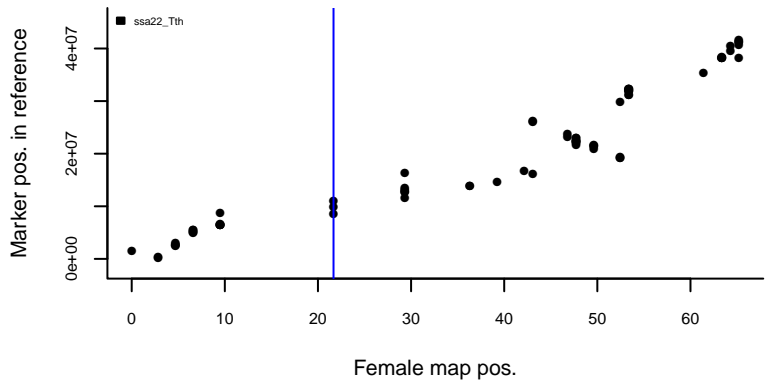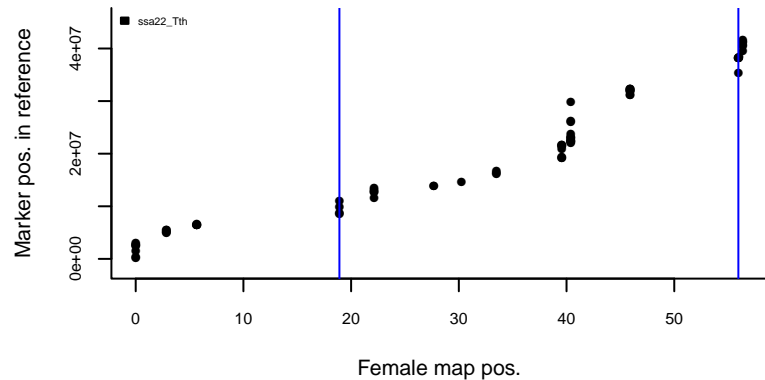

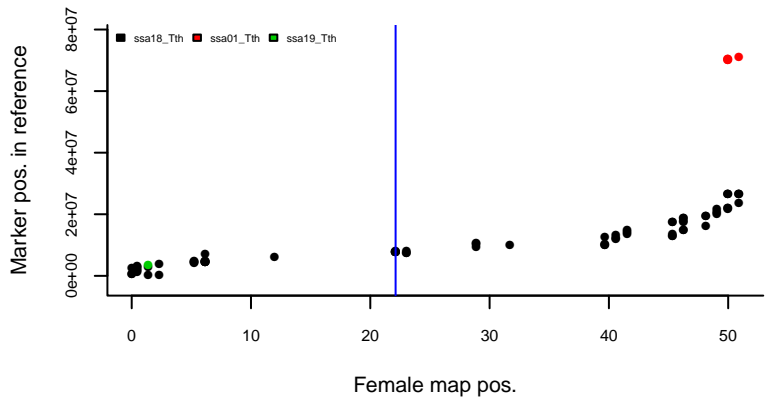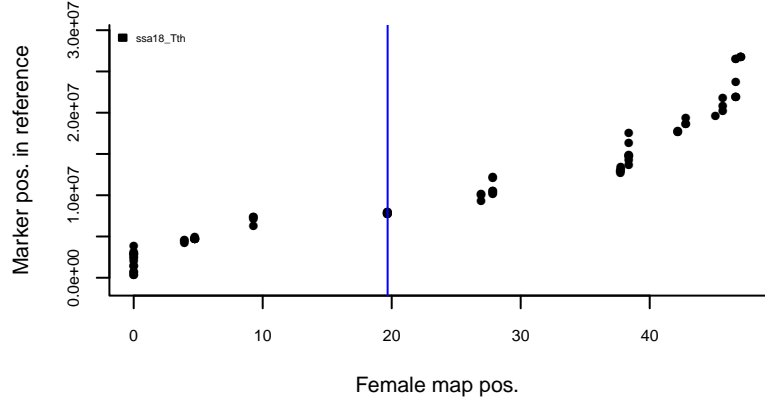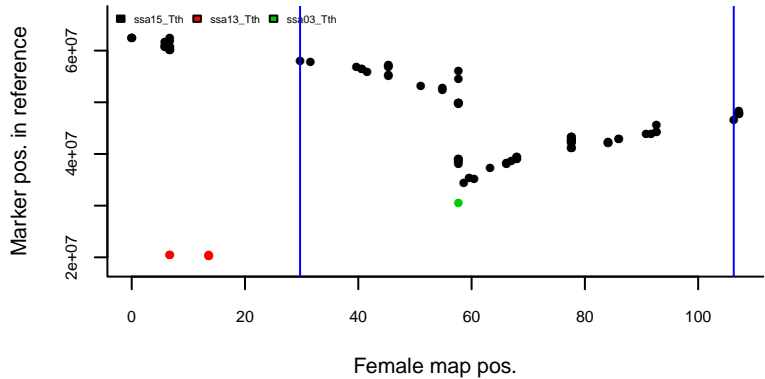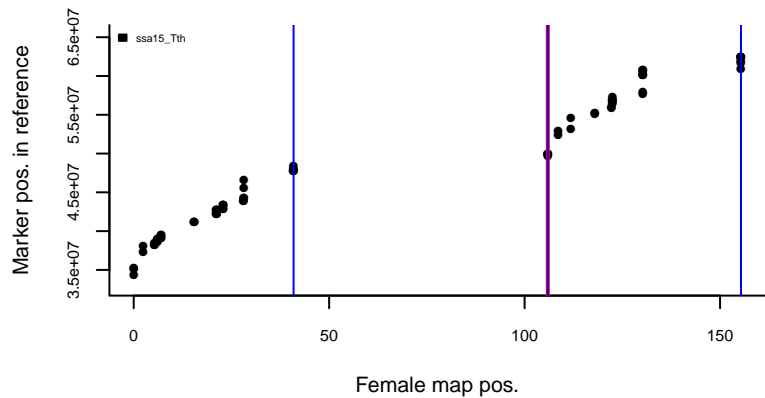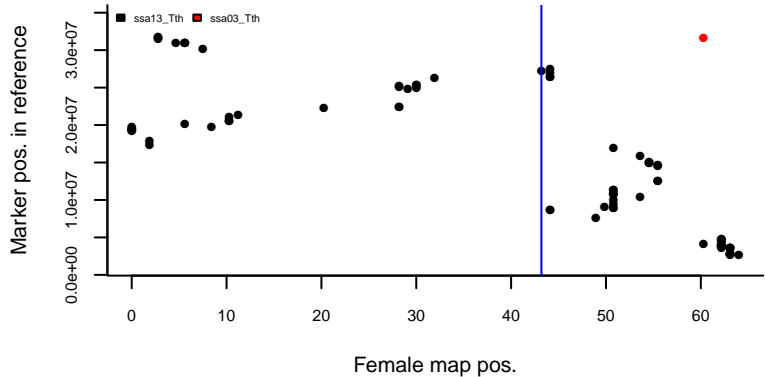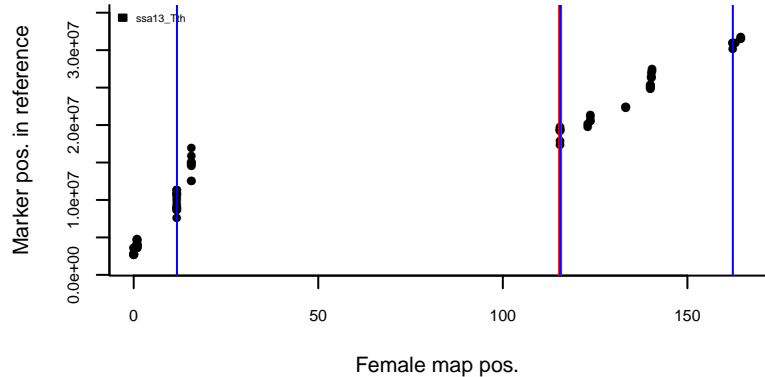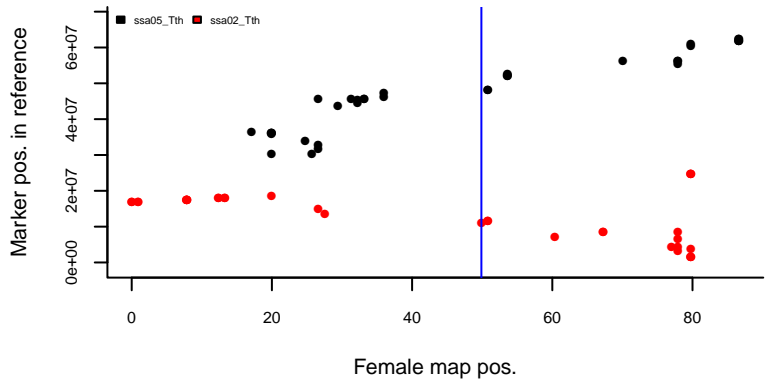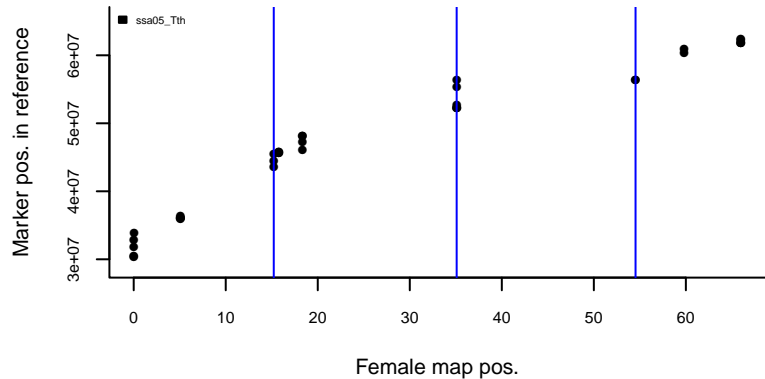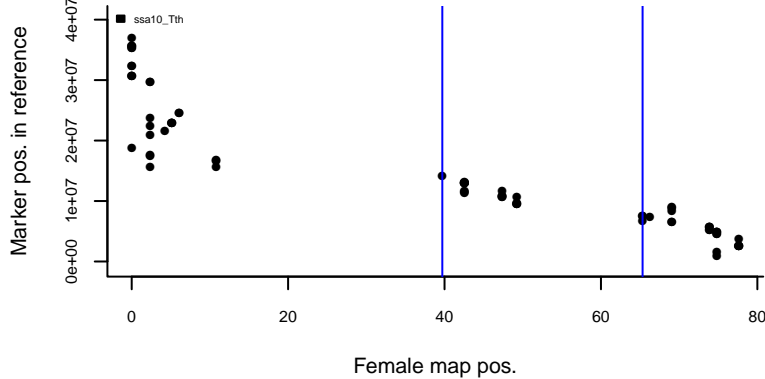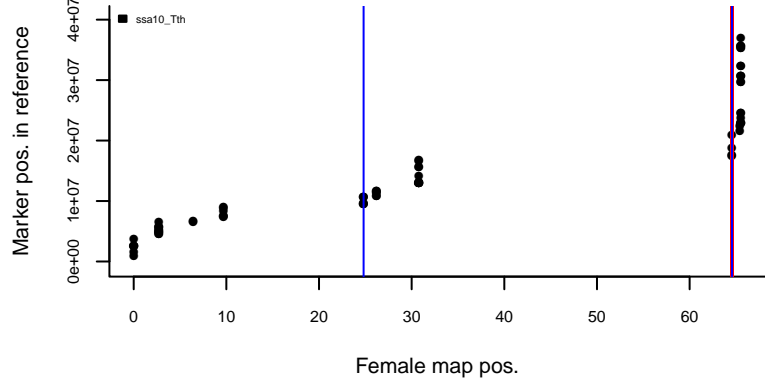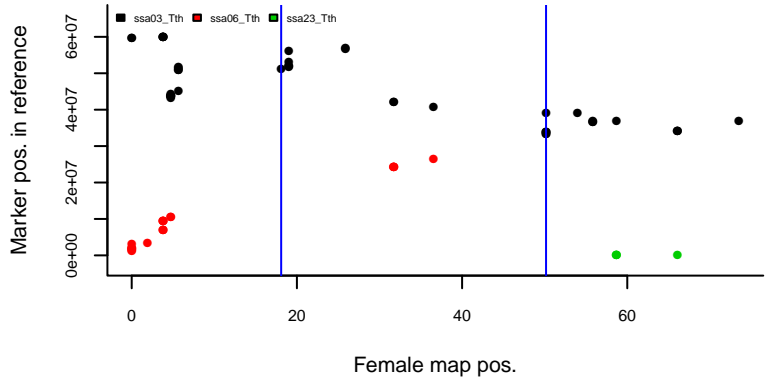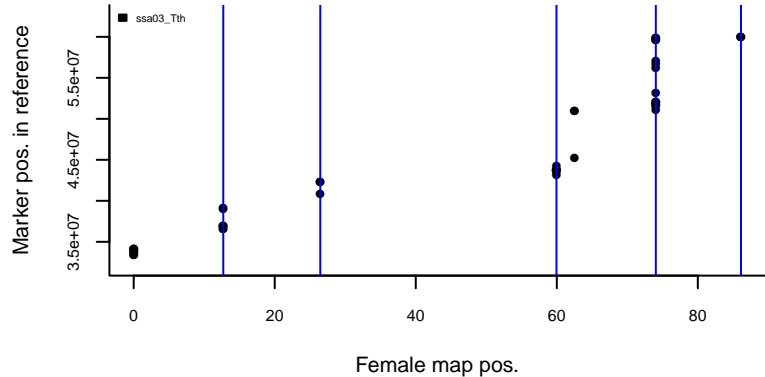

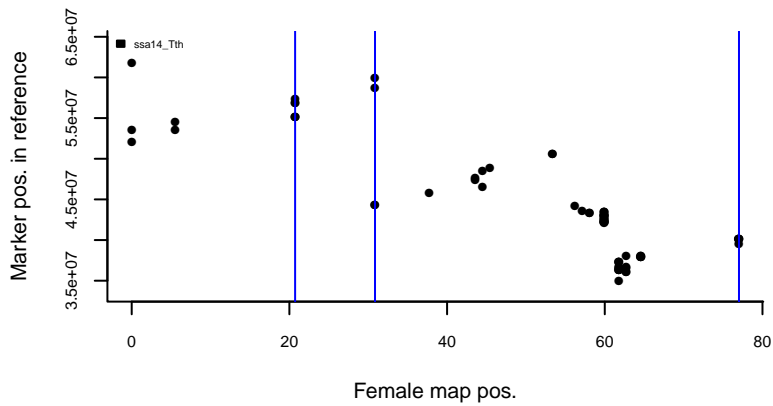

**LG 36**

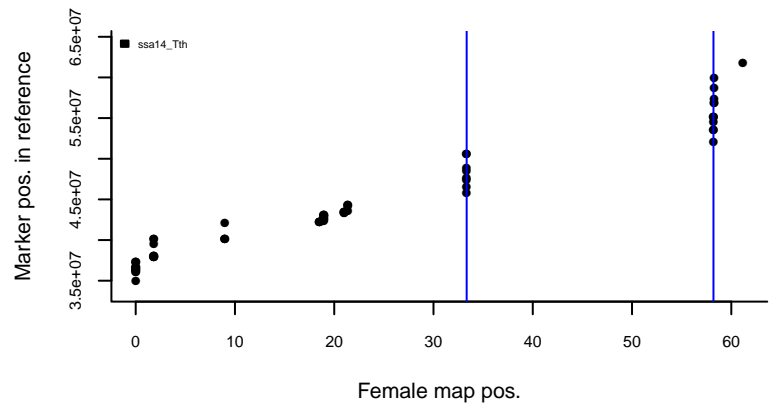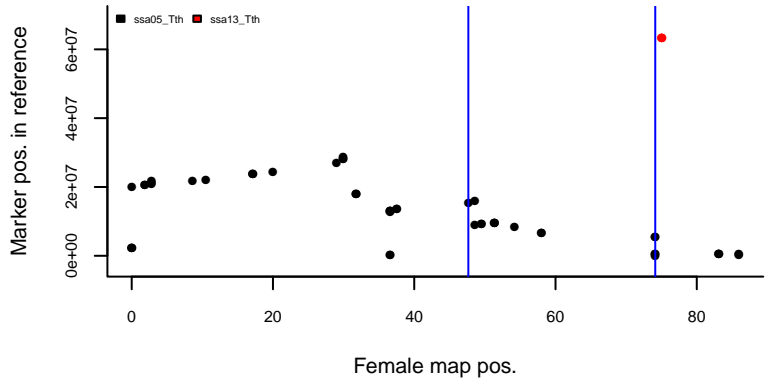

**LG 37**

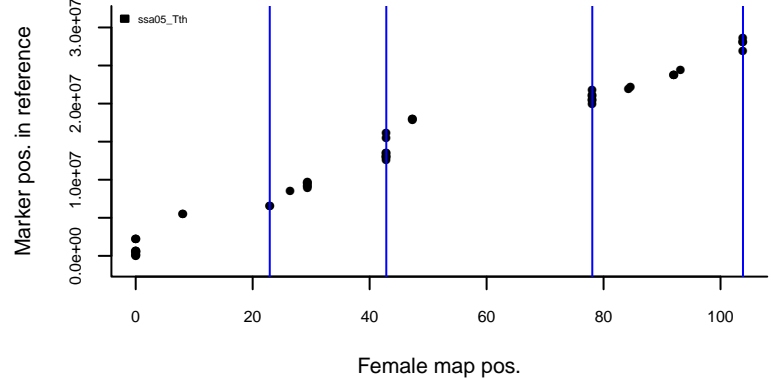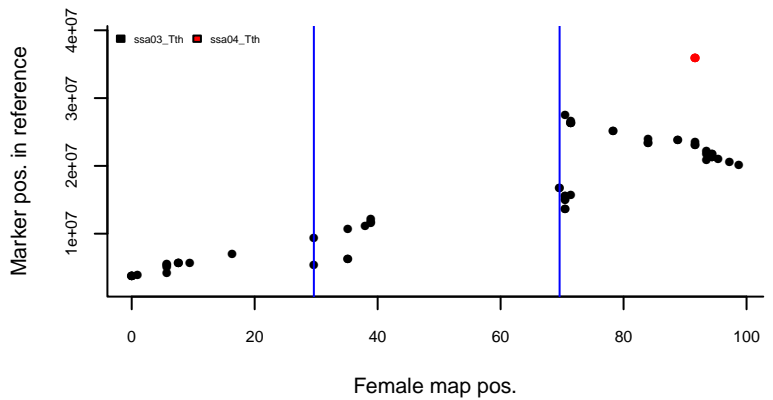

**LG 38**

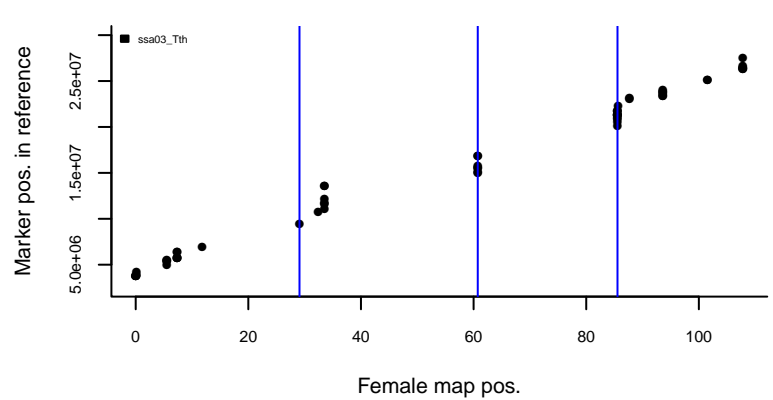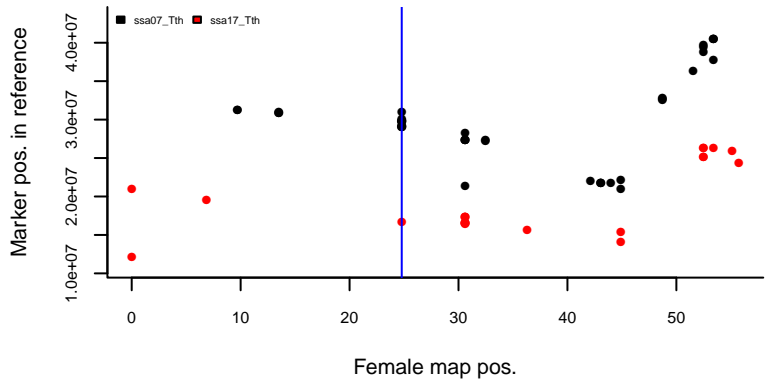

**LG 39**

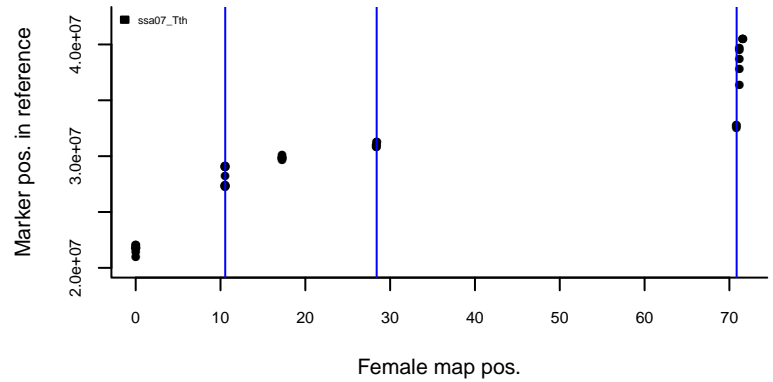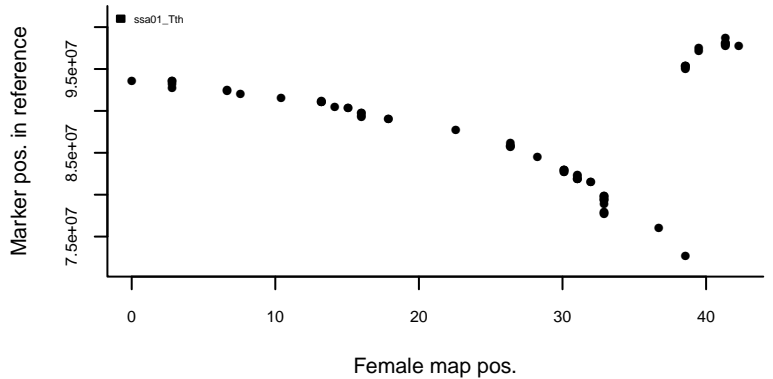

**LG 40**

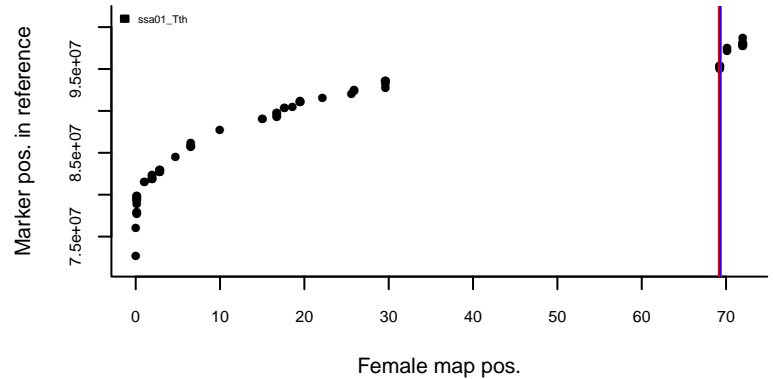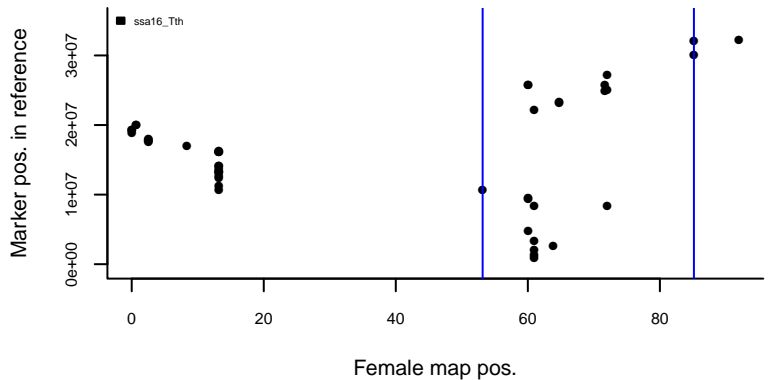

**LG 41**

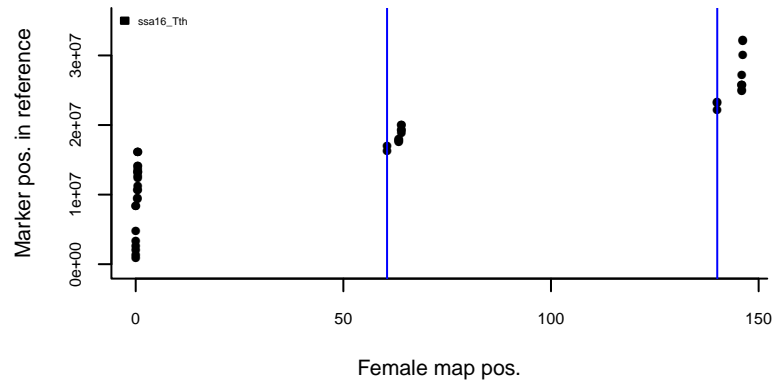



LG 42

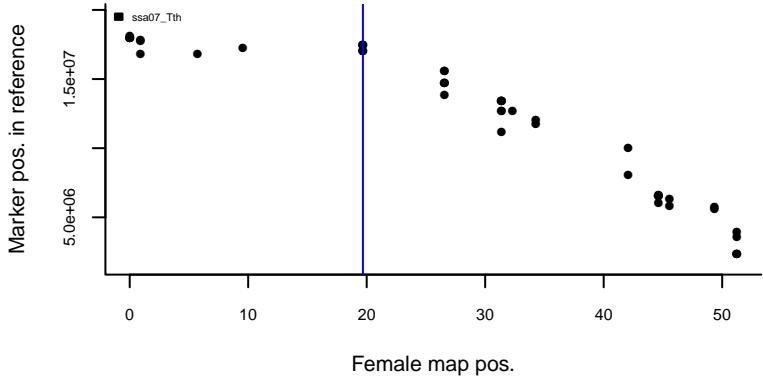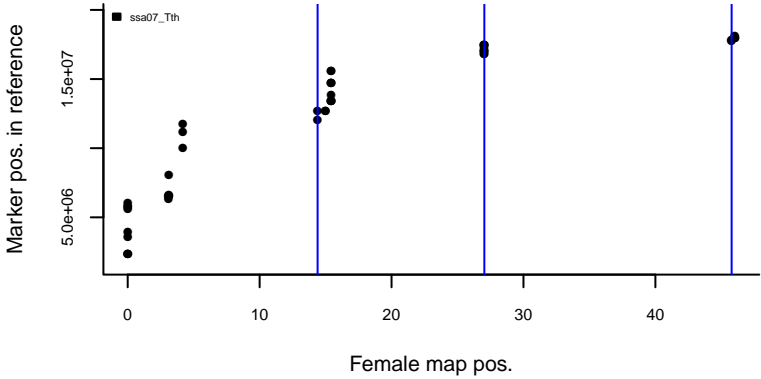

LG 43

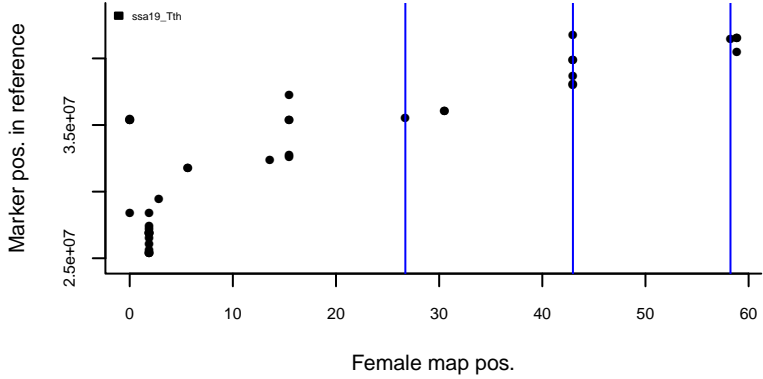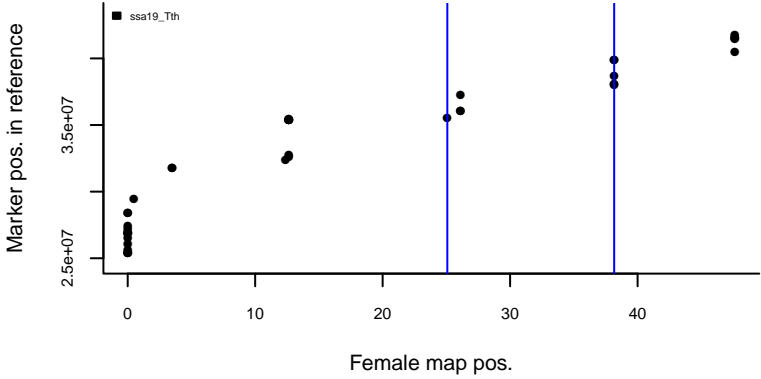

LG 44

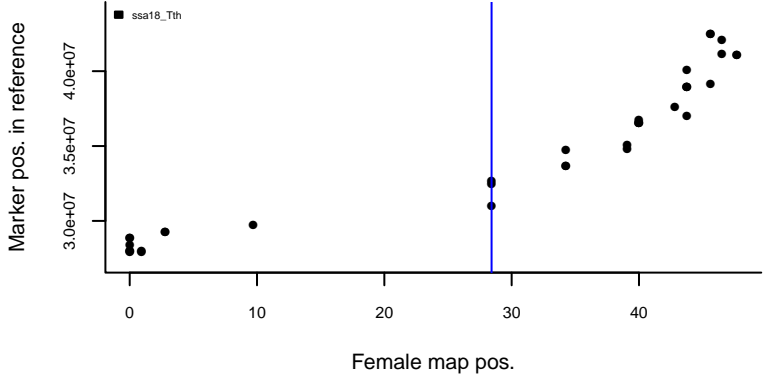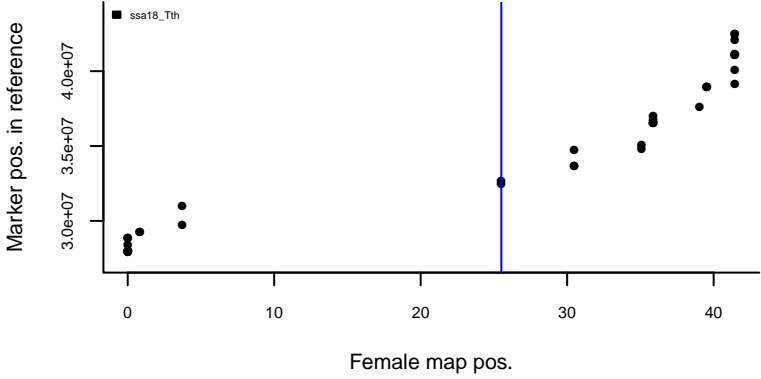

LG 45

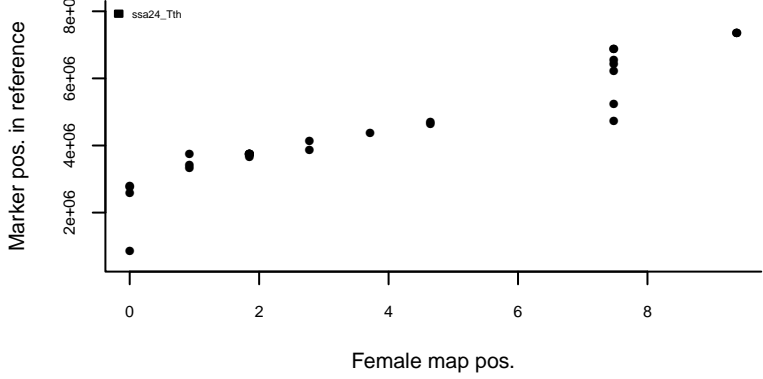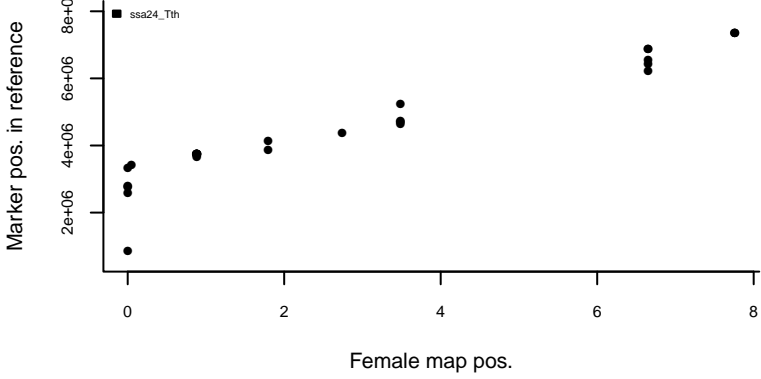

LG 46

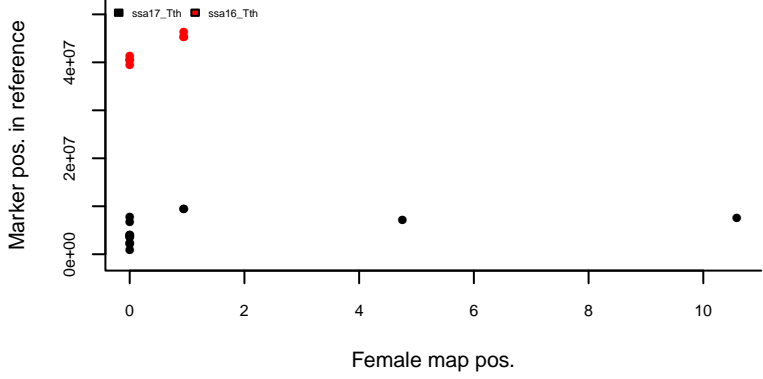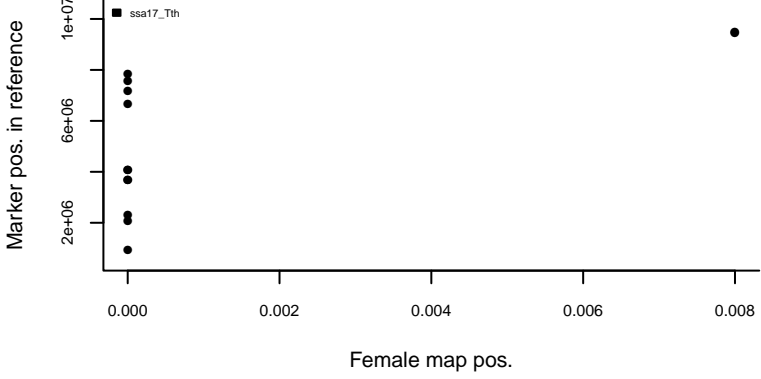

LG 47

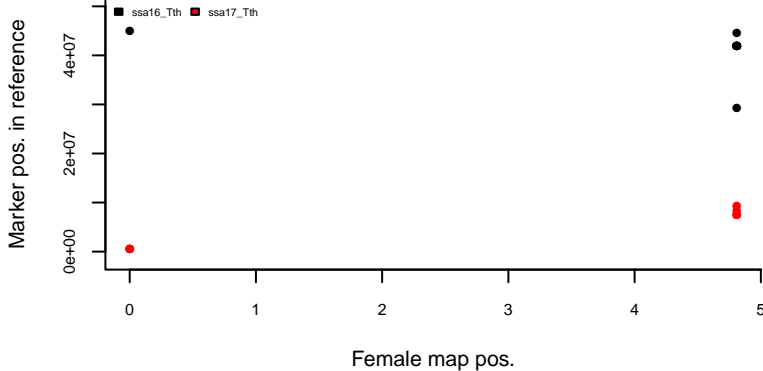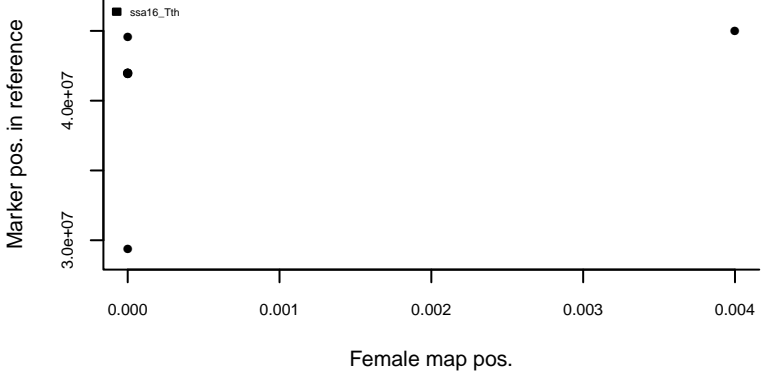

LG 48

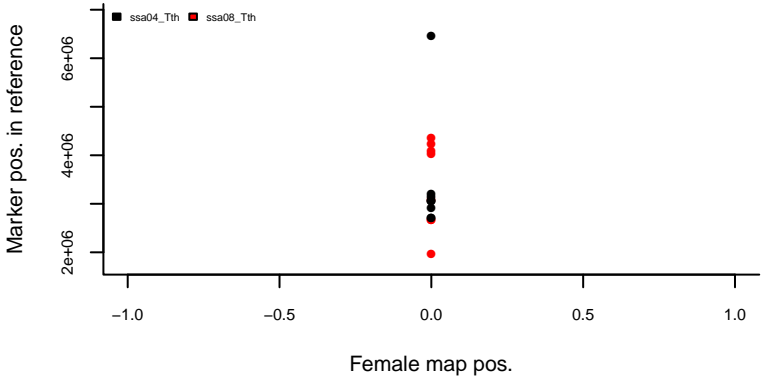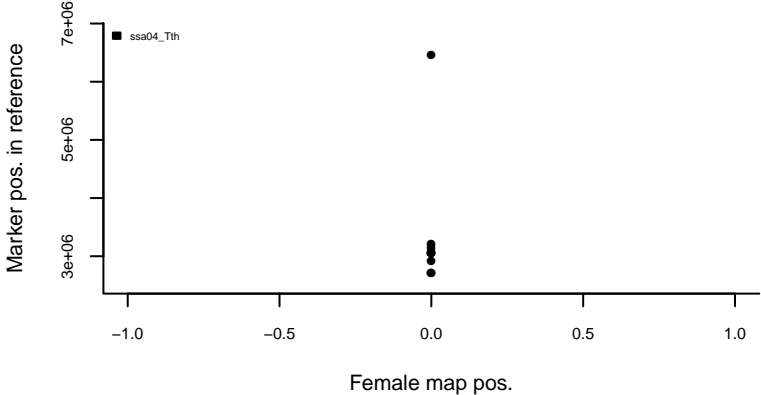

LG 49

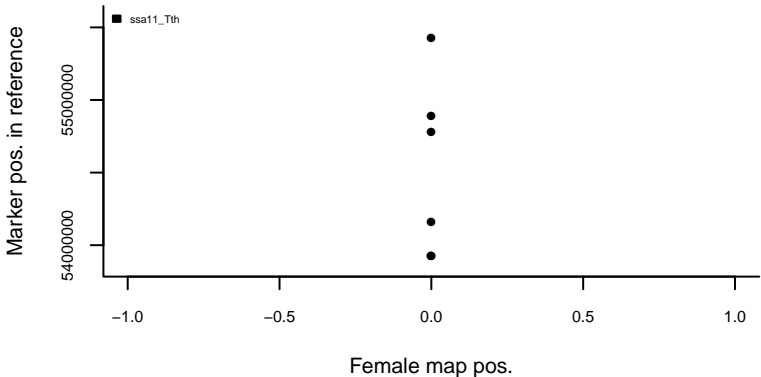

LG 50

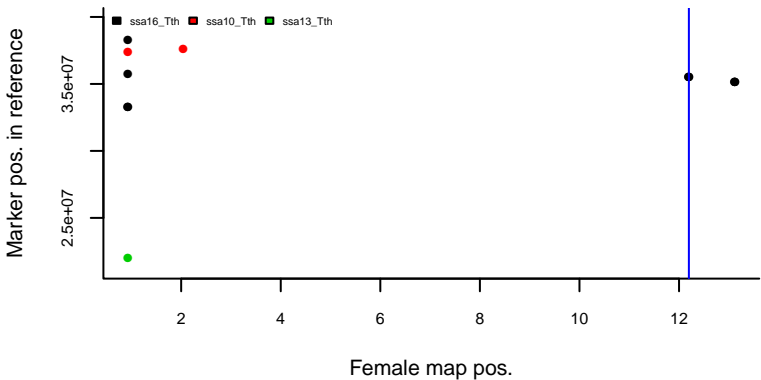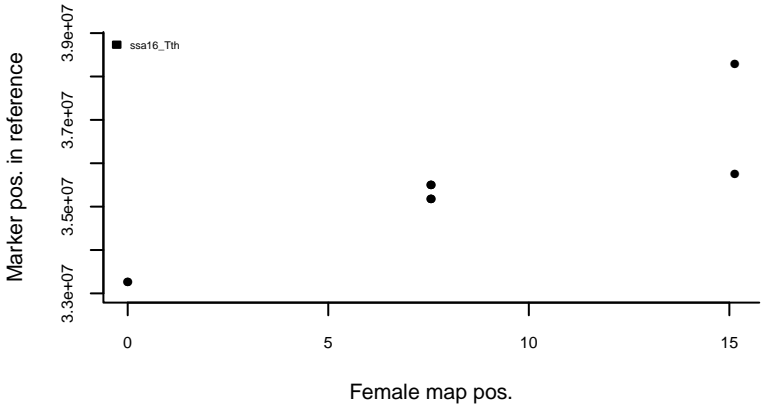

LG 51

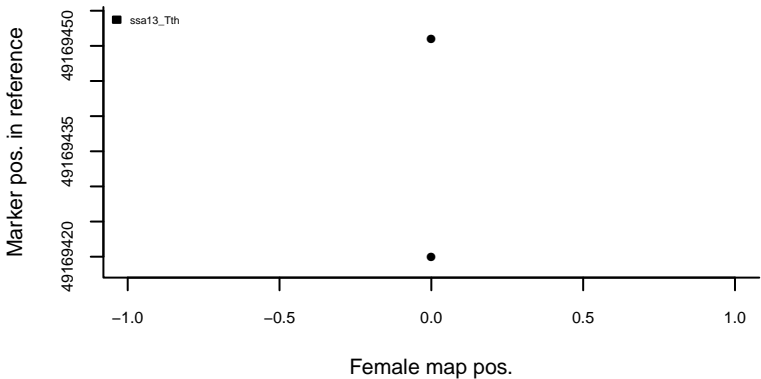

**Figure S2**  
Female-based linkage maps of the European grayling chromosomes (excluding linkage groups for 9A, 9B and 25B where linkage groups could not be derived from the data). See Table S2 for complete lists of markers in the linkage groups.

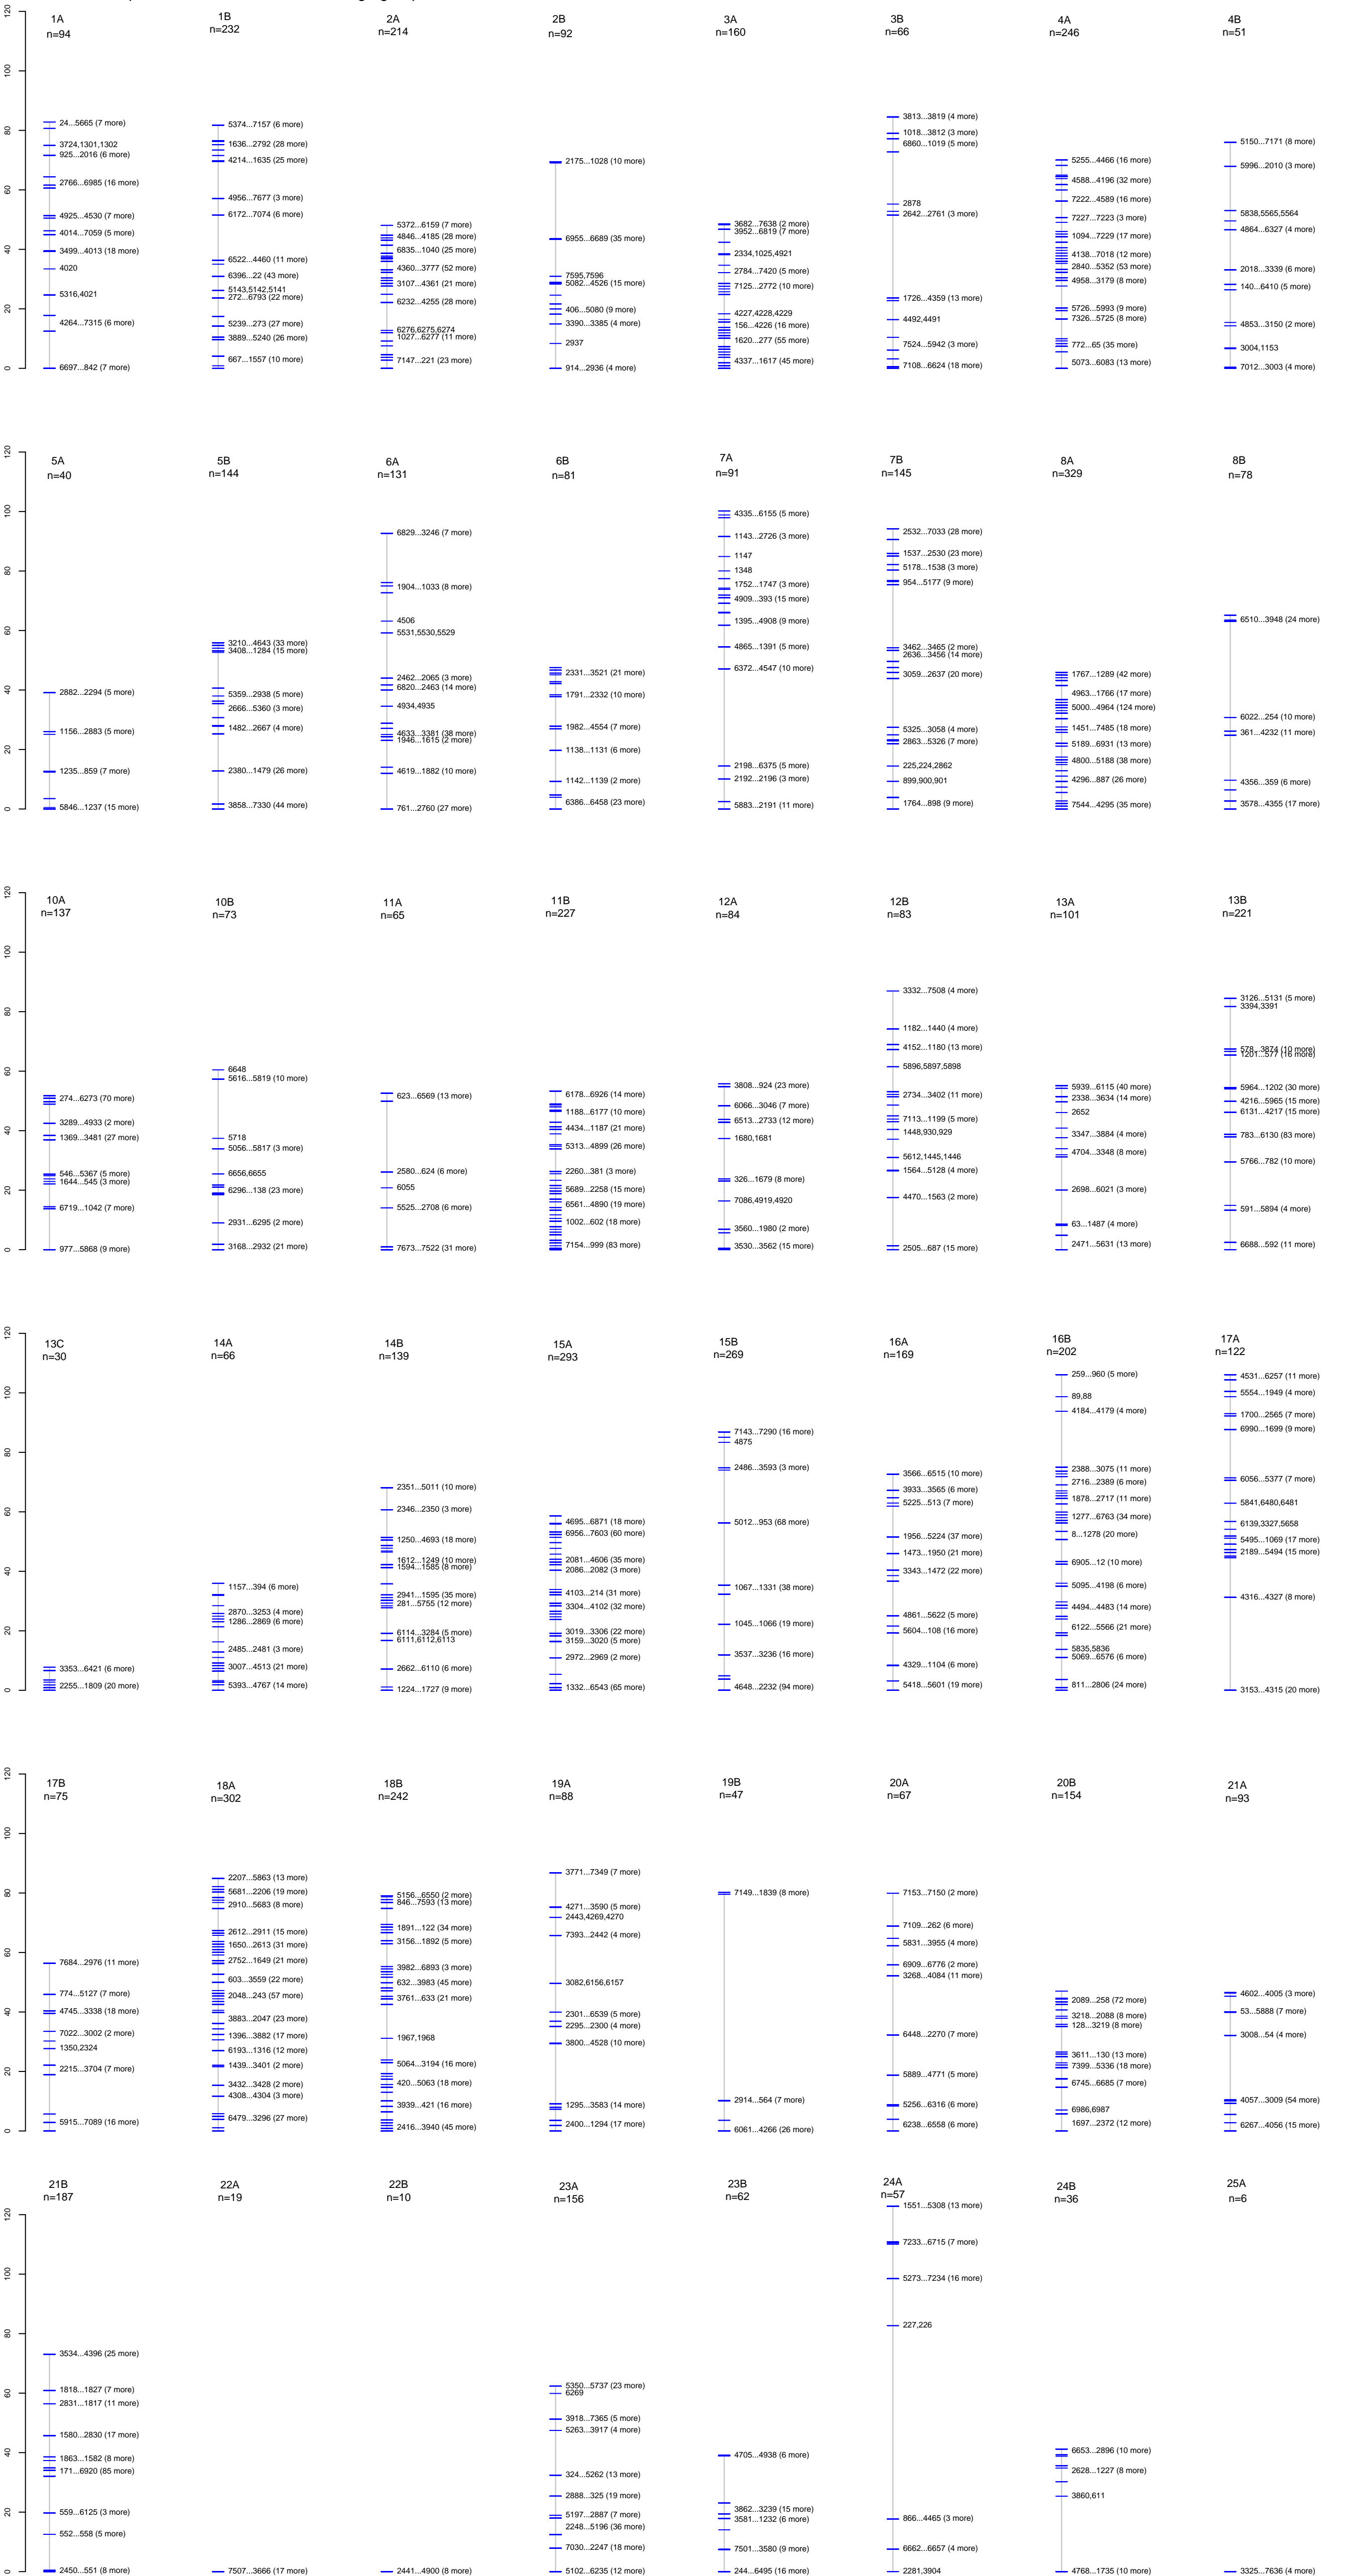

**Figure S3**

Repeat elements at the European grayling genome. Principal components of element abundance peak positions along each chromosome (A) and element abundancies in the chromosomes (B).

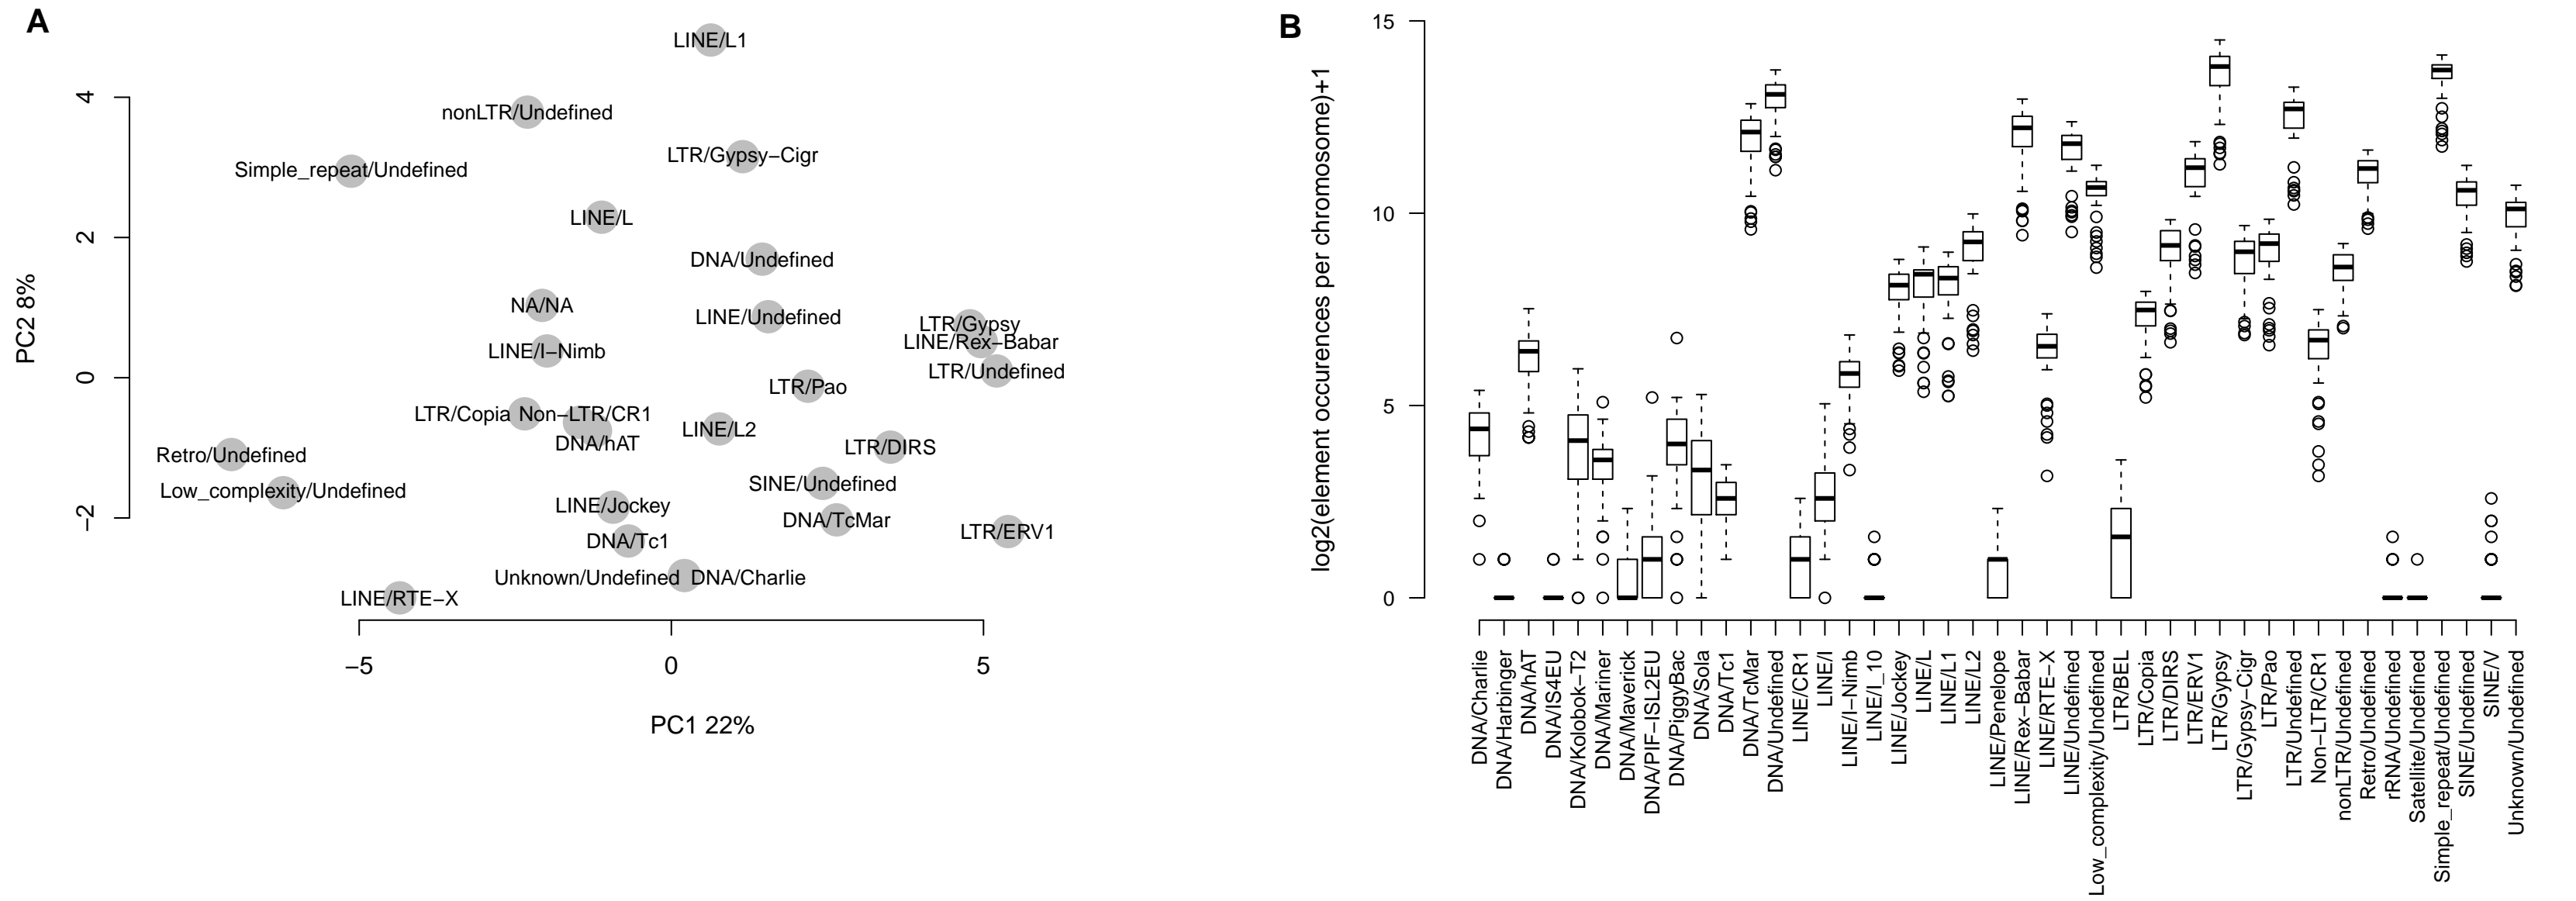

Figure S4

Scaffold positions in 119 synteny blocks in the European grayling vs. Northern pike position comparison (A) and in the European grayling vs. Atlantic salmon position comparison (B).

The predicted peak abundance of Tc1-Mariner elements in each European grayling chromosome are marked with purple lines. The block ordering (from 1st to up to 5th block) within each European grayling chromosome are marked in different colors, see color legends in each figure (B). The genome-wide block numbering (from 1st to 119th block) and whether the block orientation is inverted between European grayling and Atlantic salmon are marked above each block in the figures (B).

A Synteny with northern pike

1A

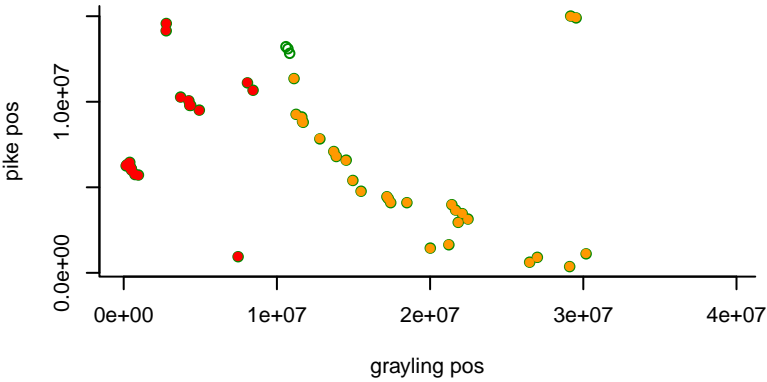

1B

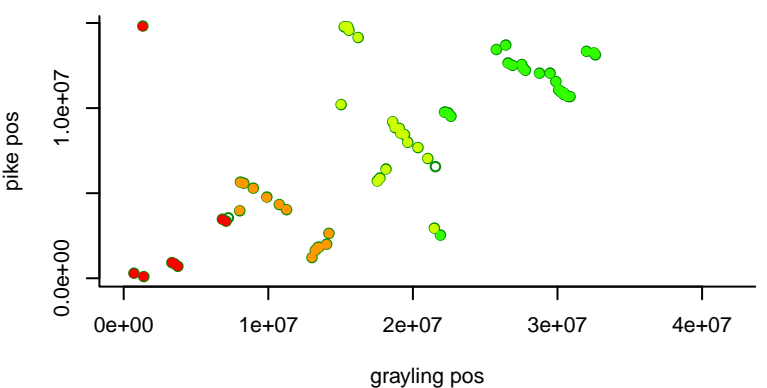

2A

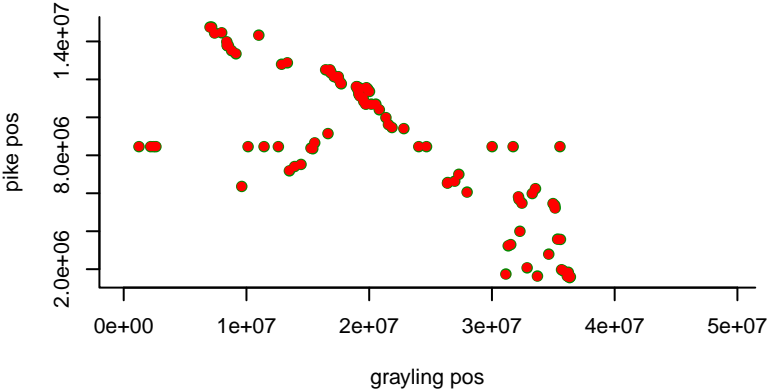

2B

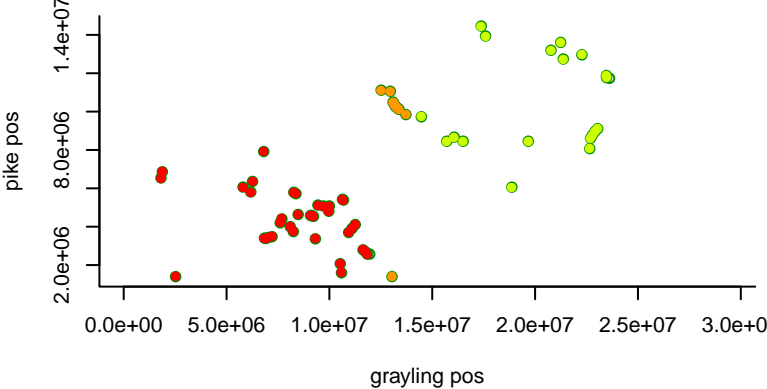

3A

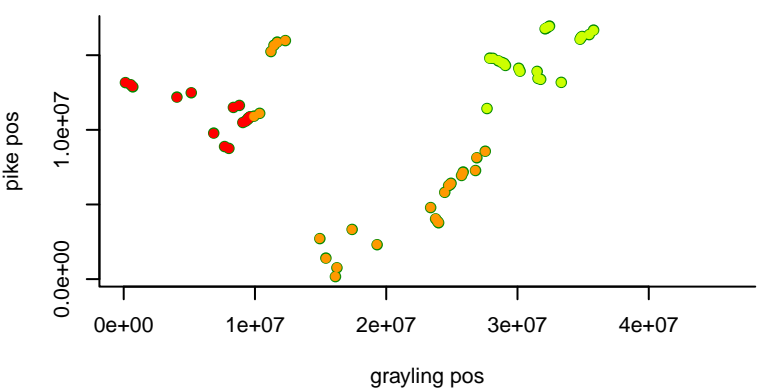

B Synteny with Atlantic salmon

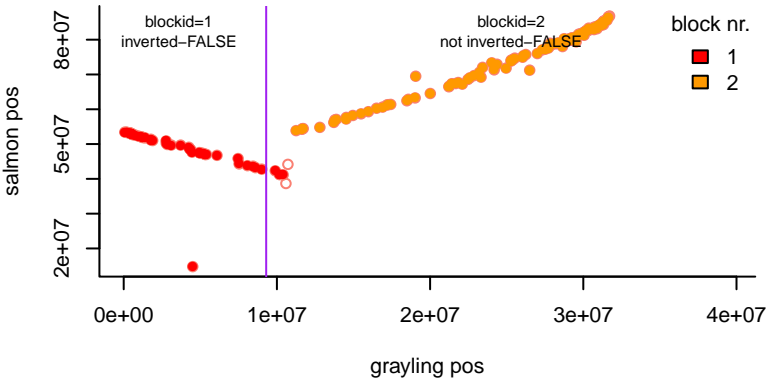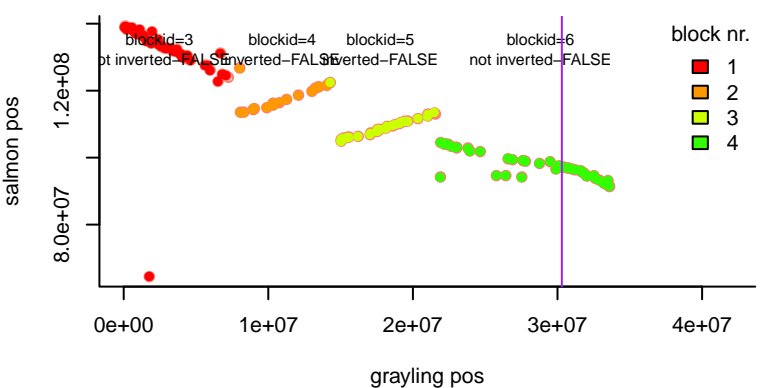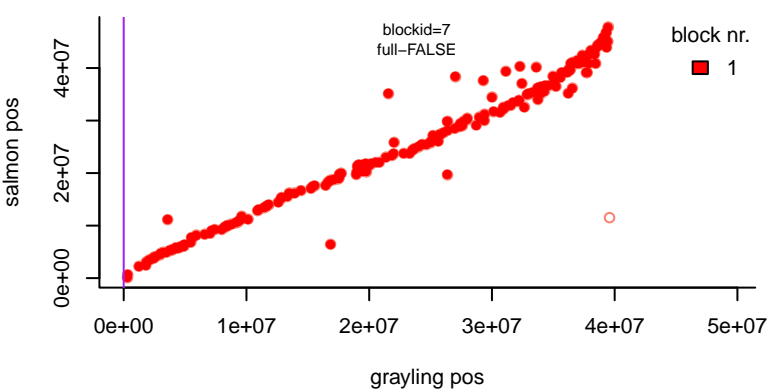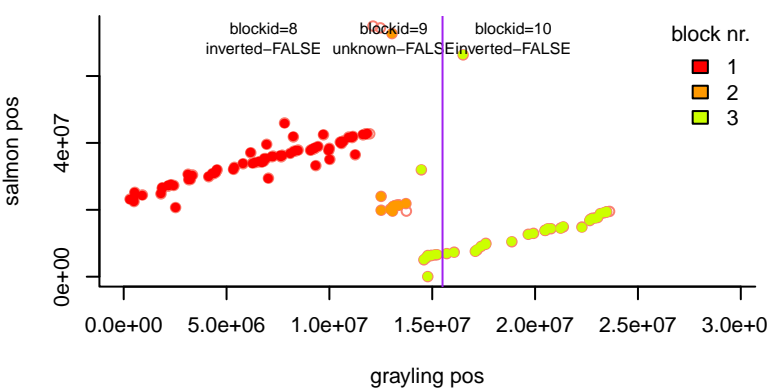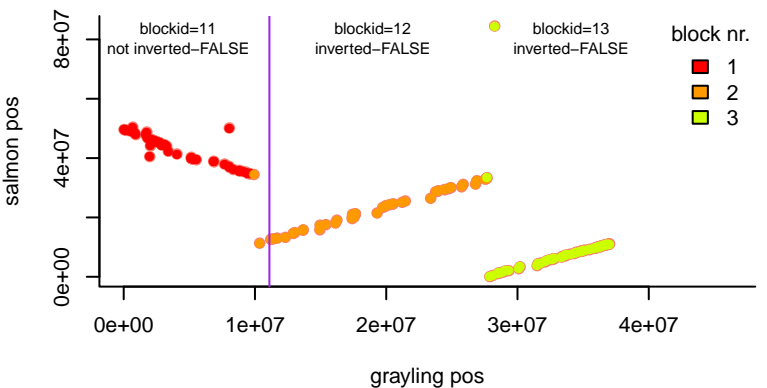

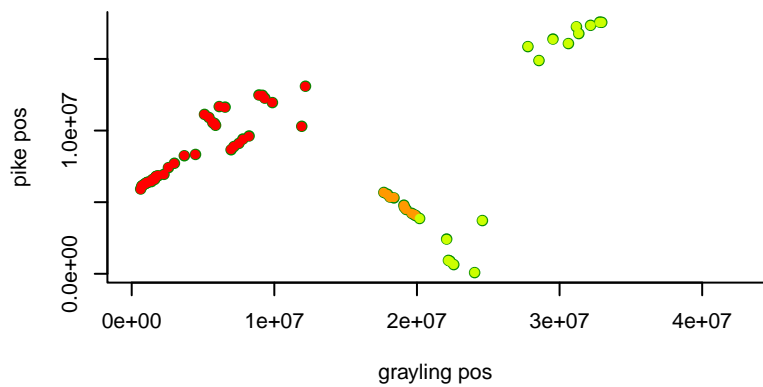

3B

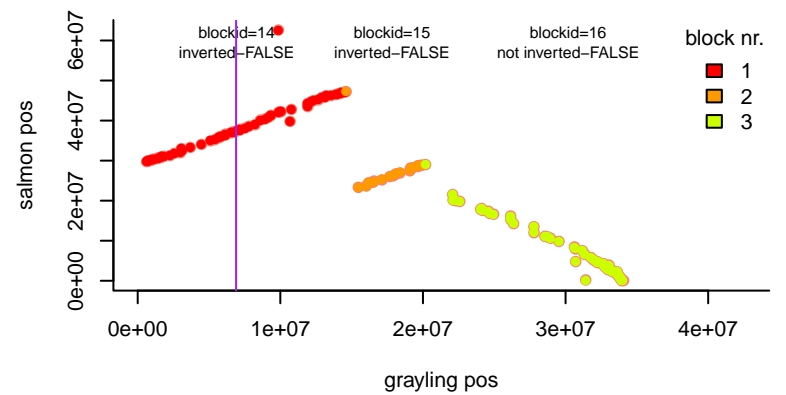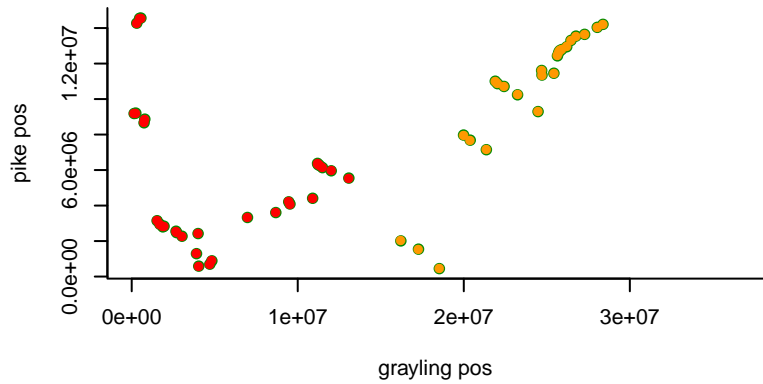

4A

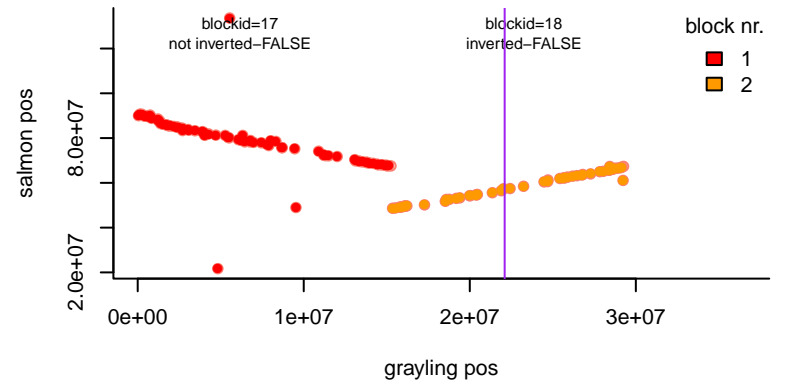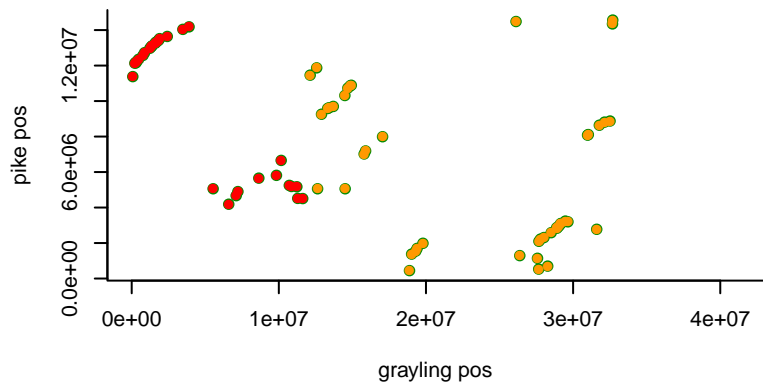

4B

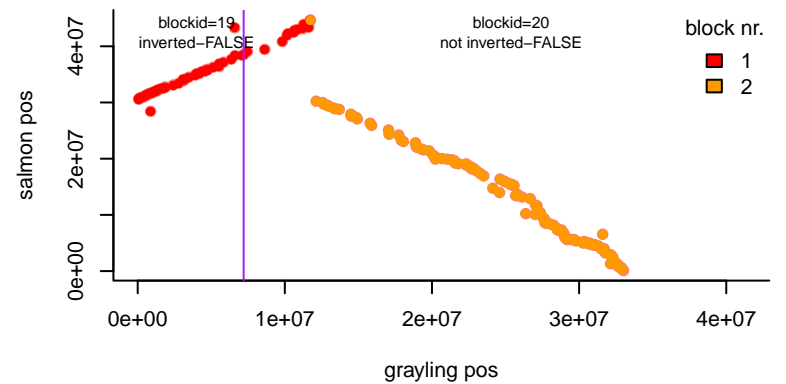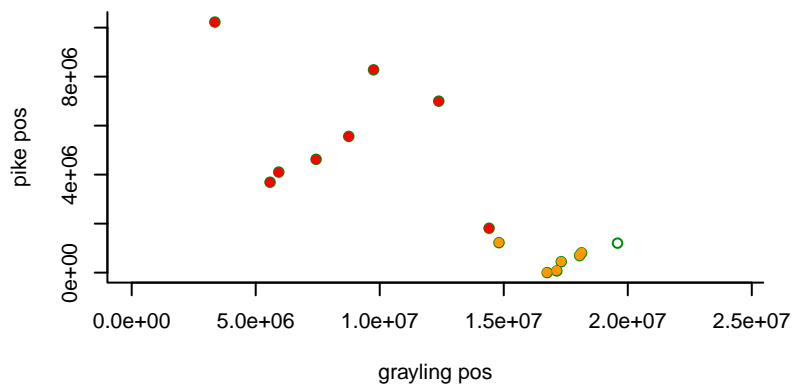

5A

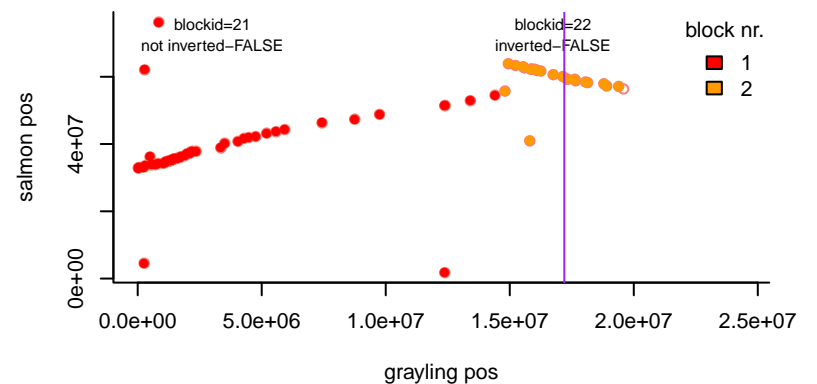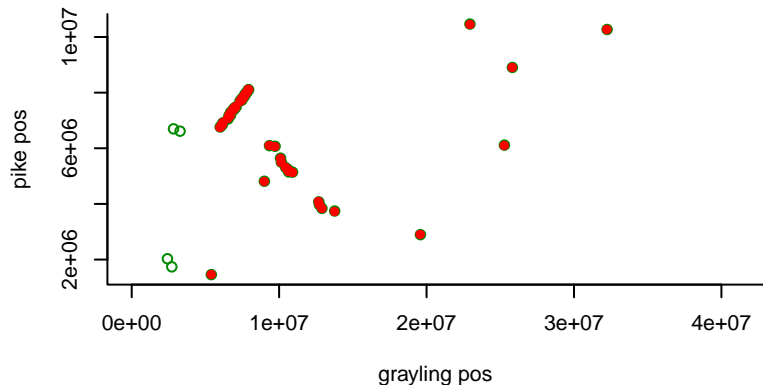

5B

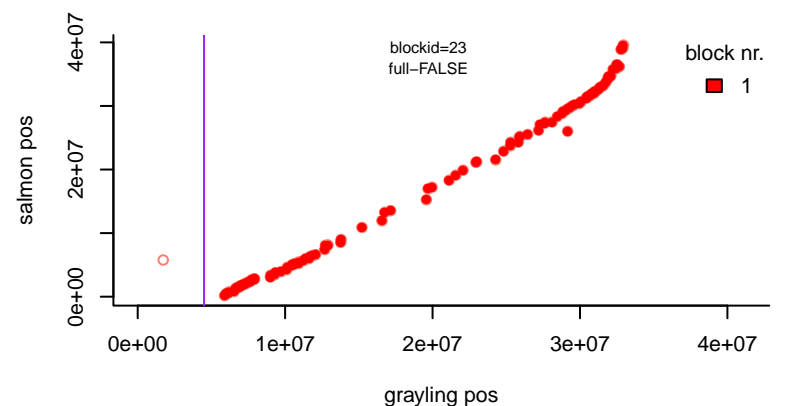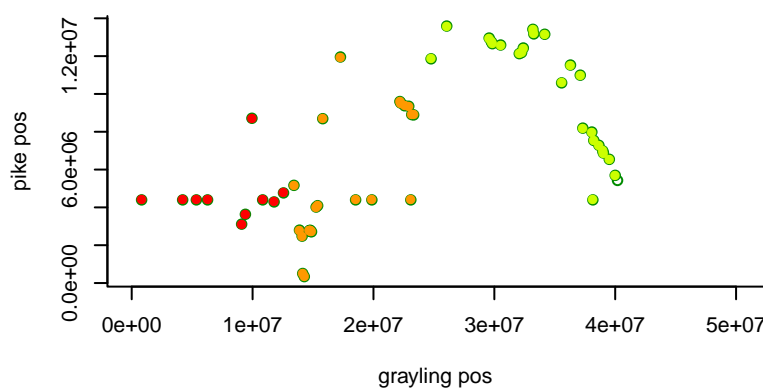

6A

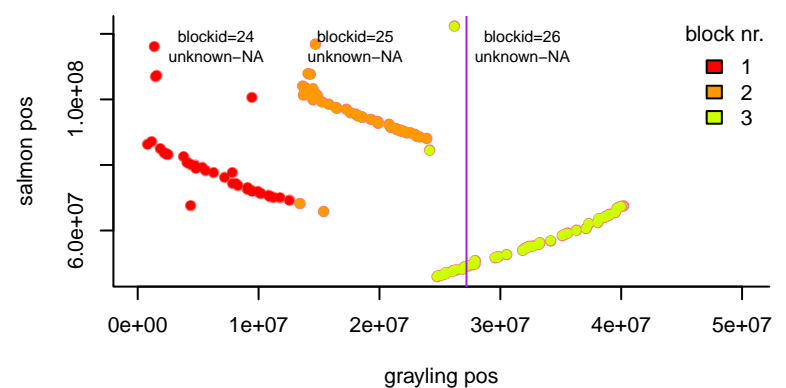

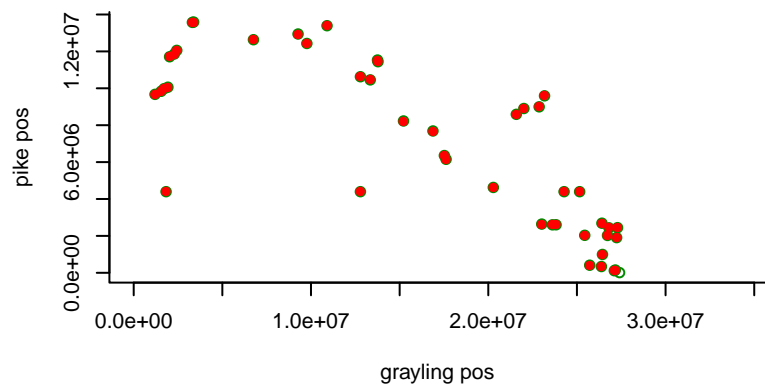

6B

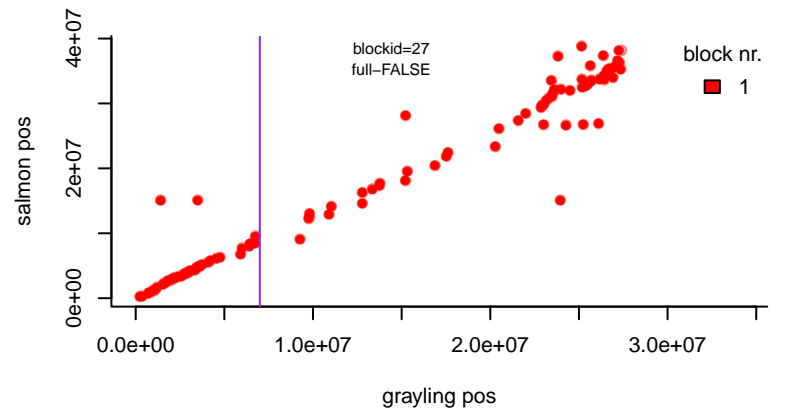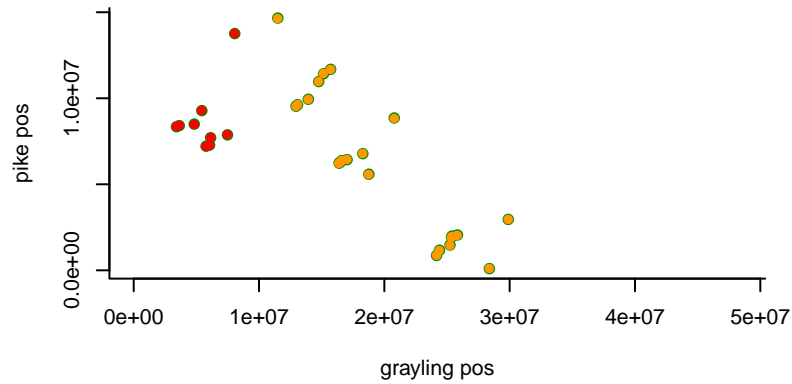

7A

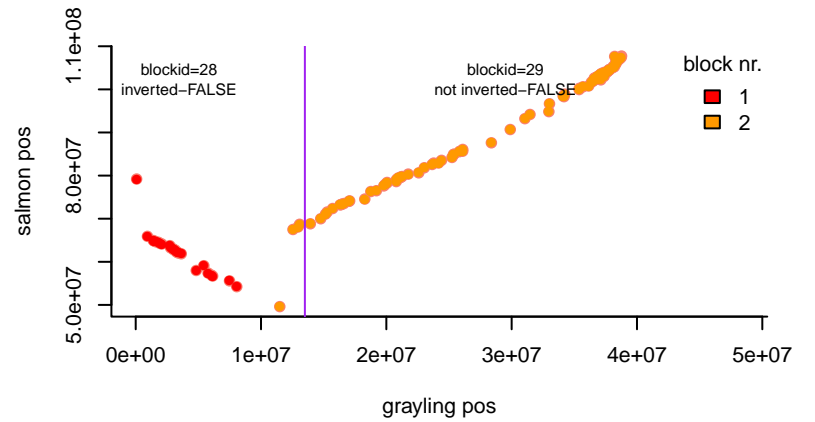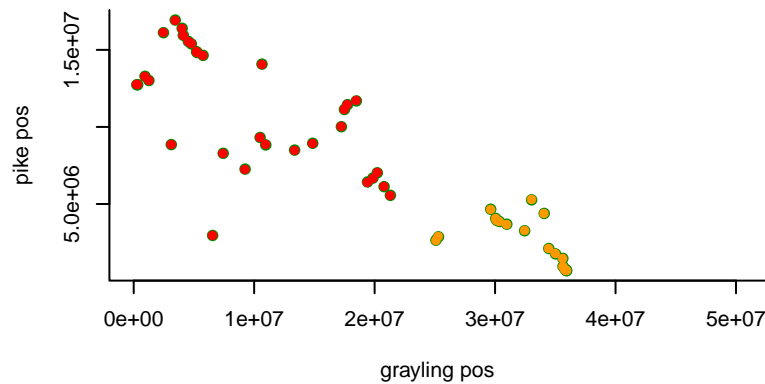

7B

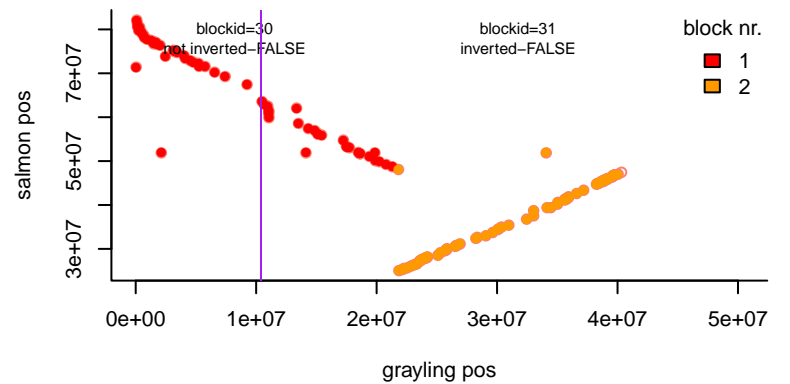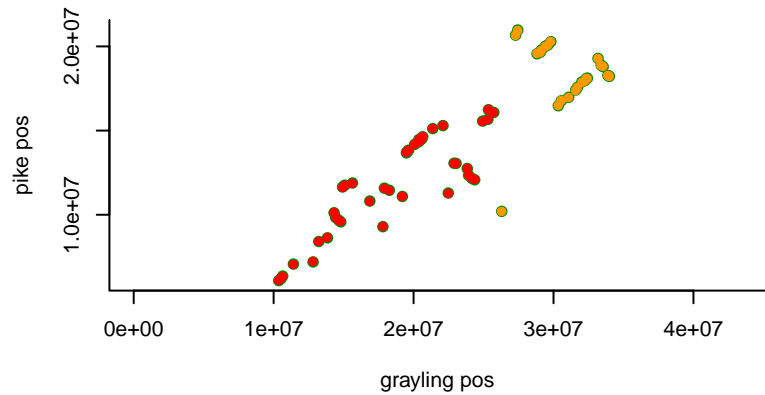

8A

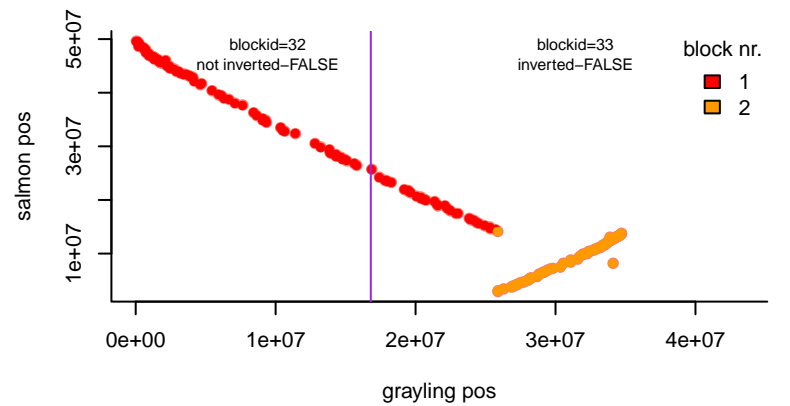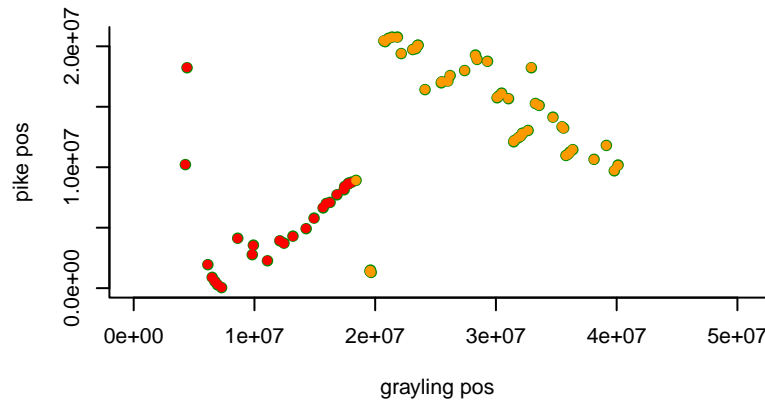

8B

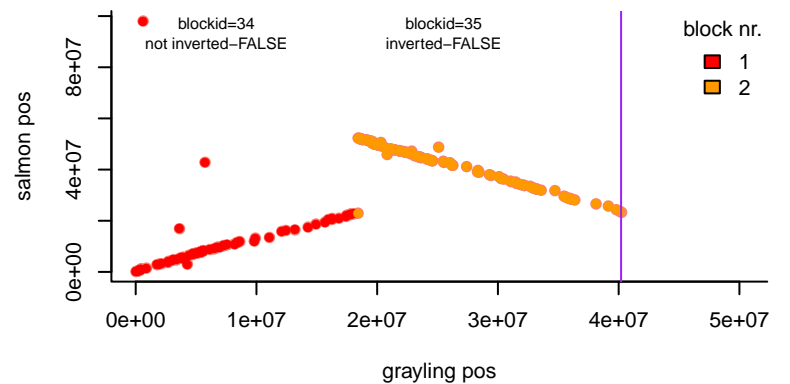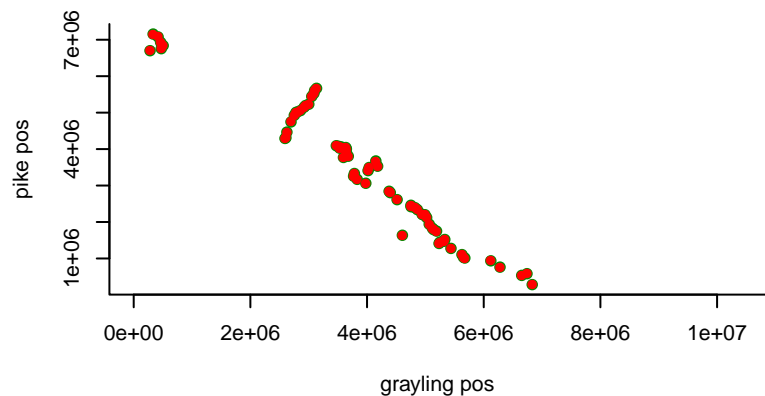

9A

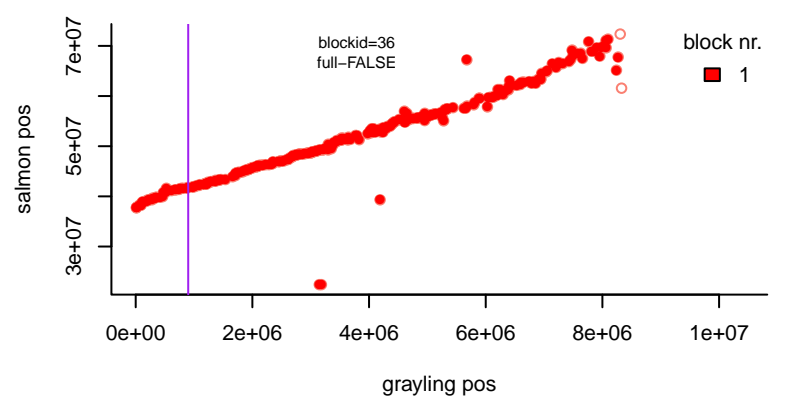

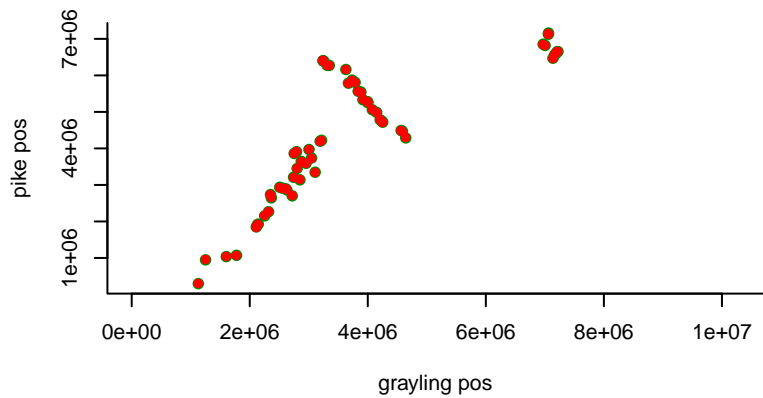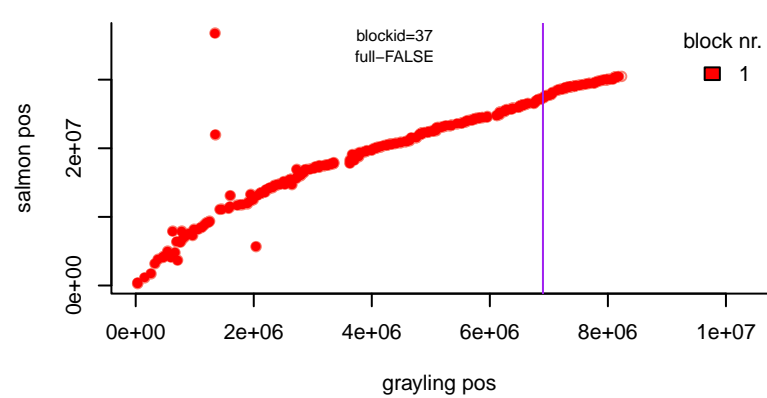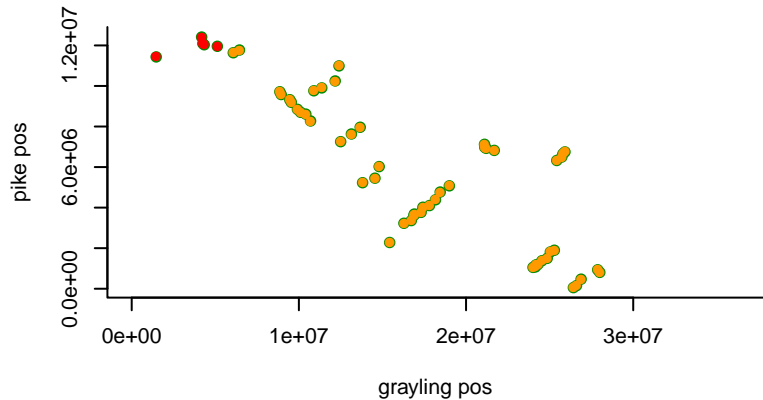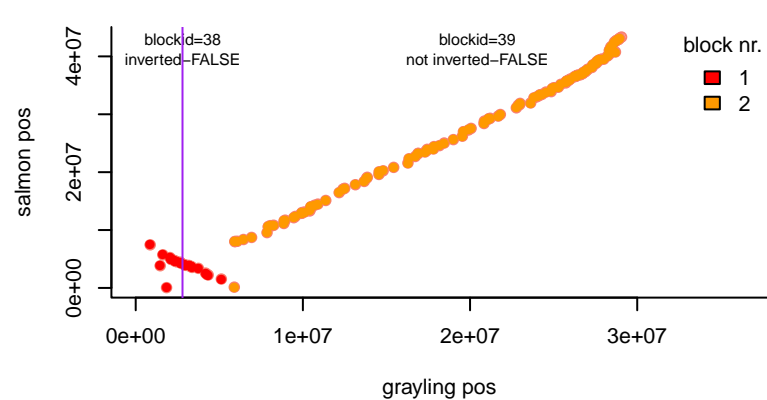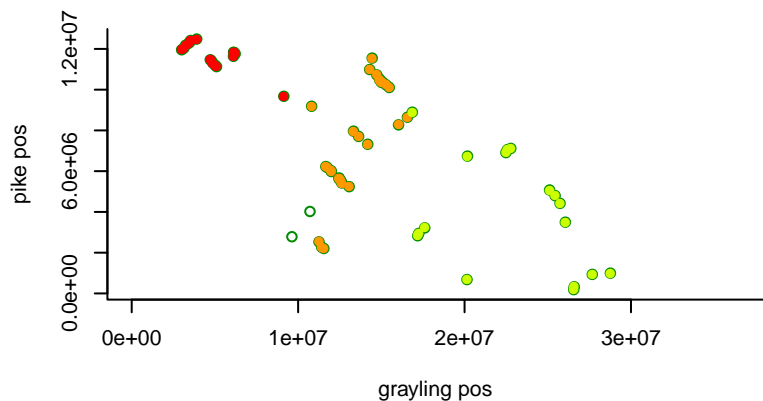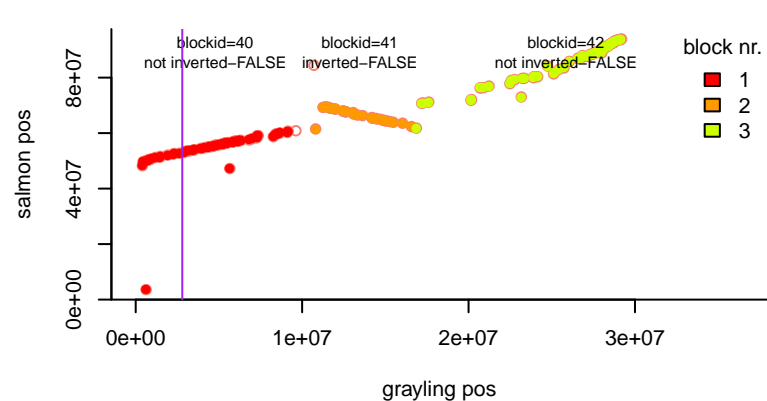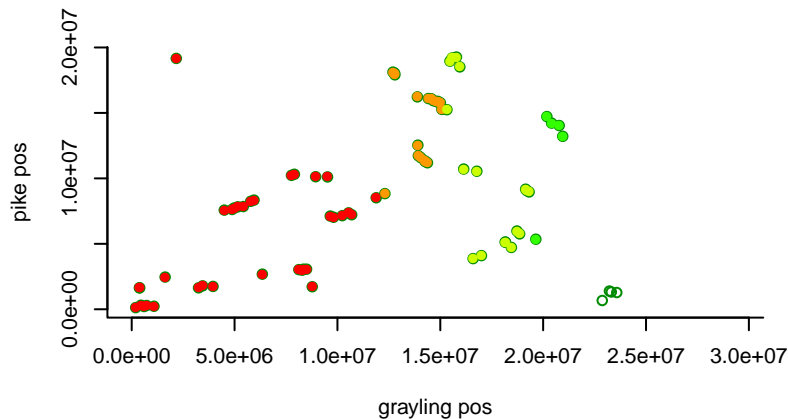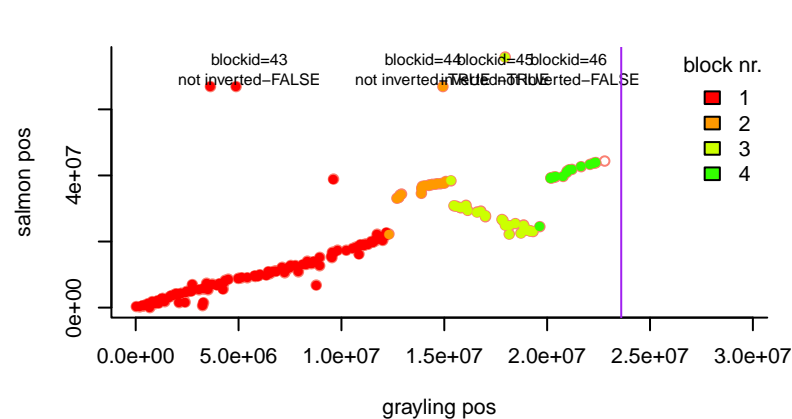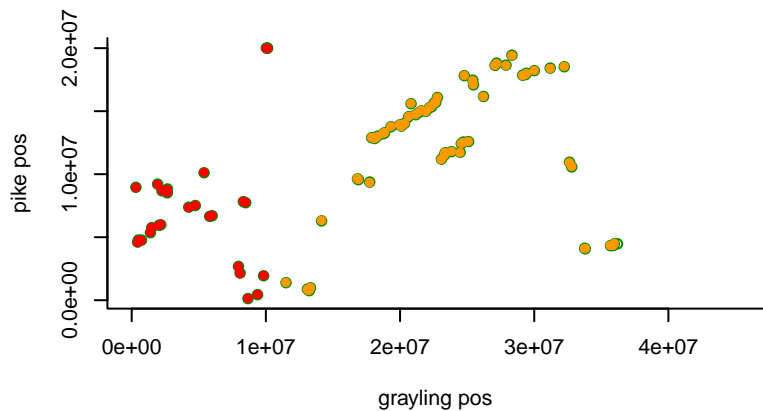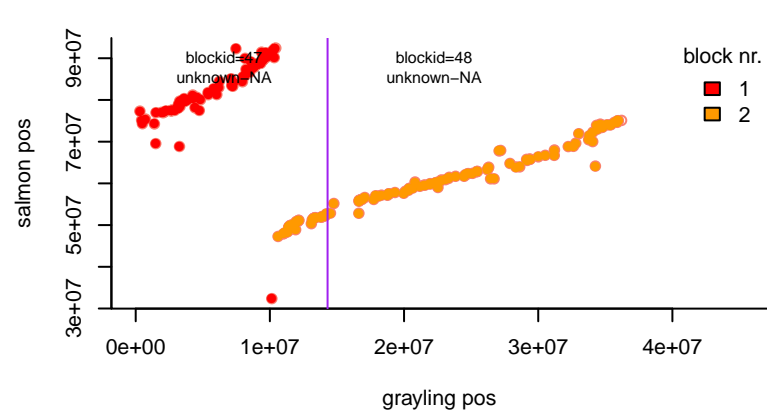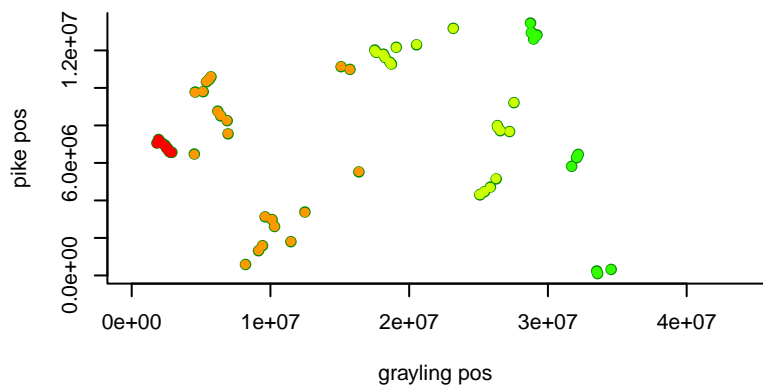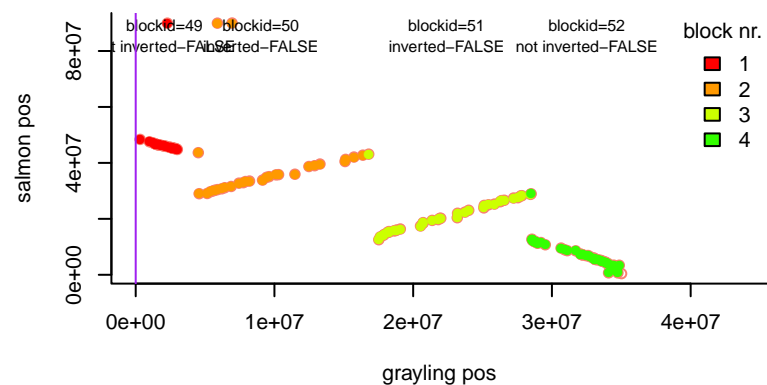



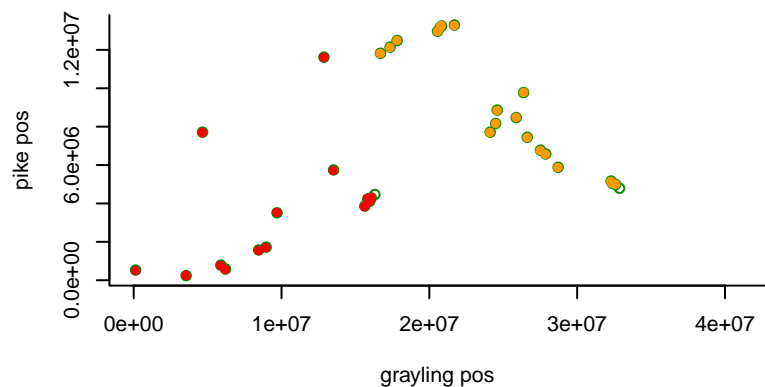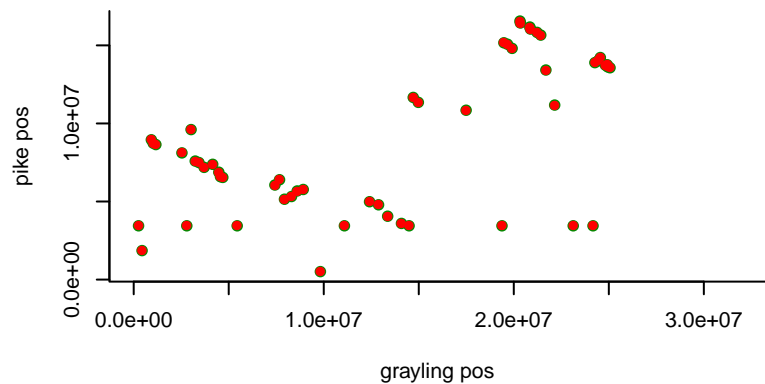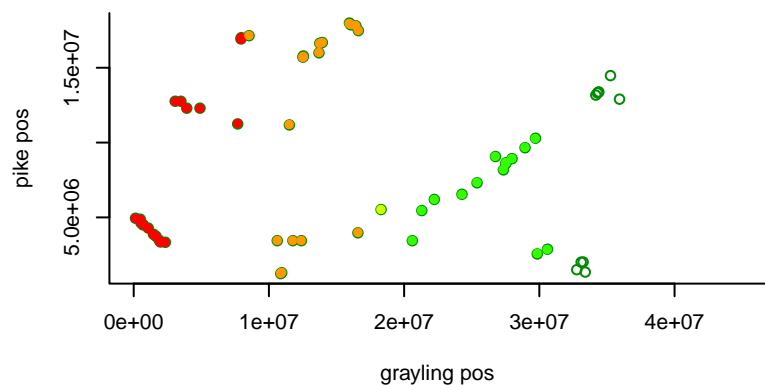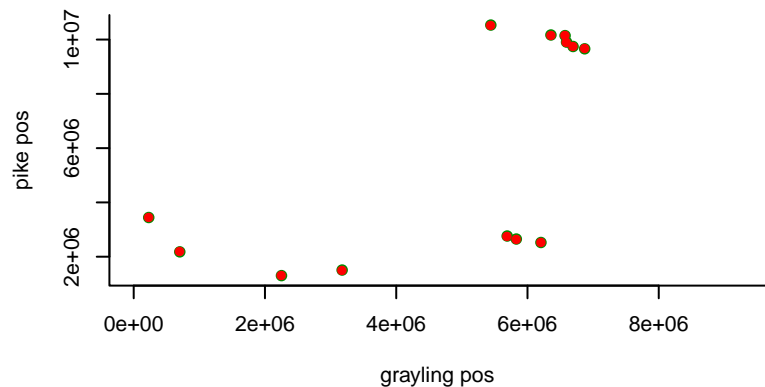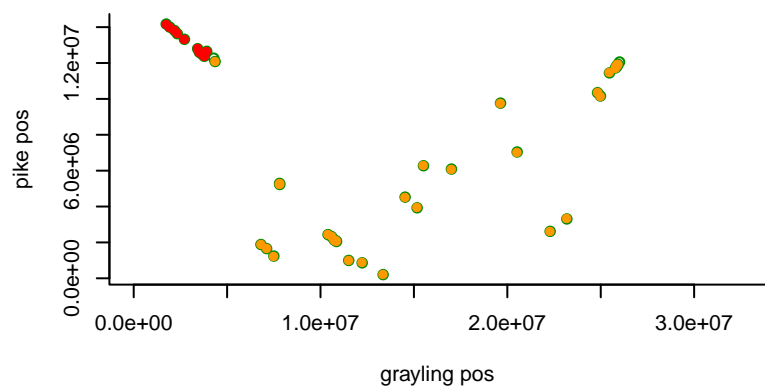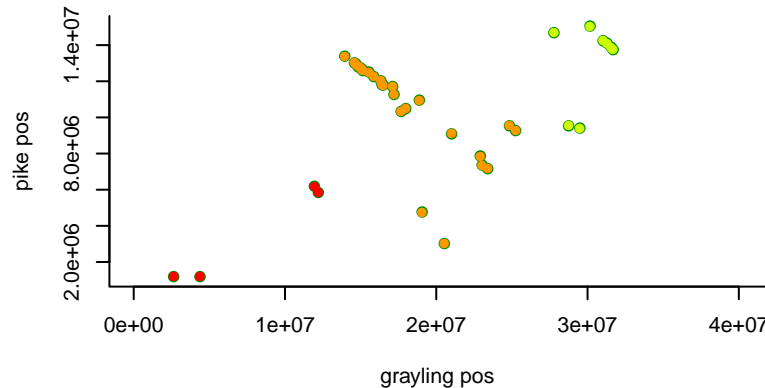

12B

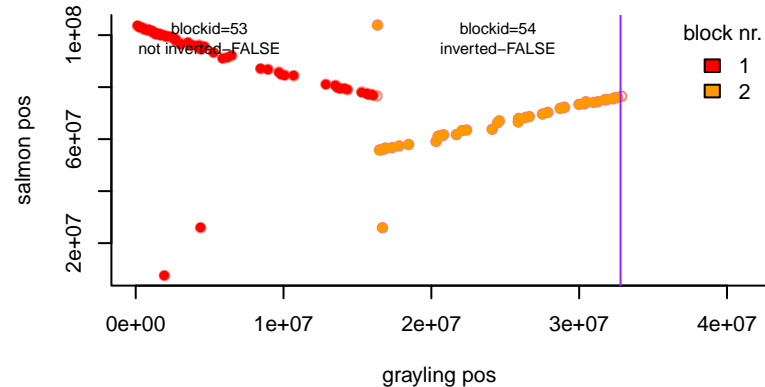

13A

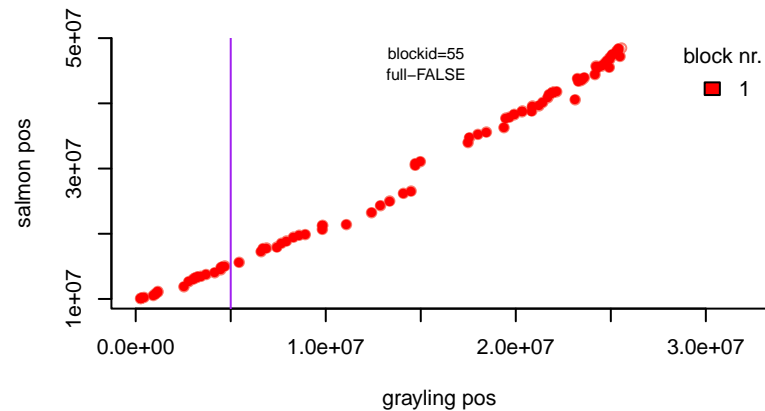

13B

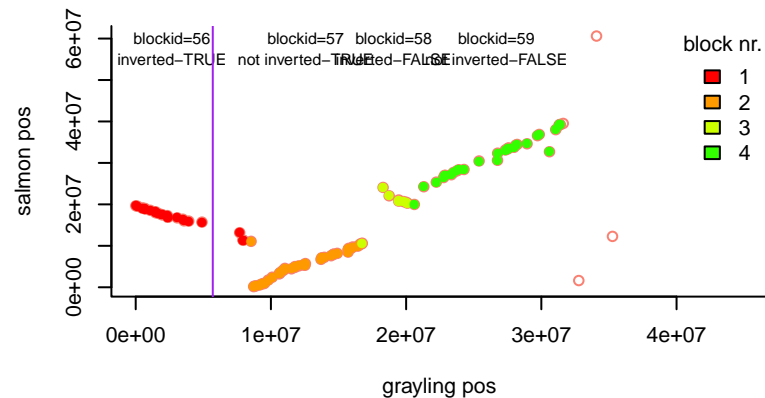

13C

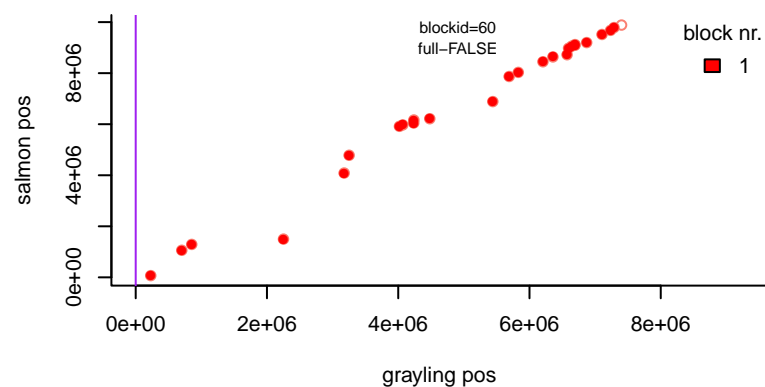

14A

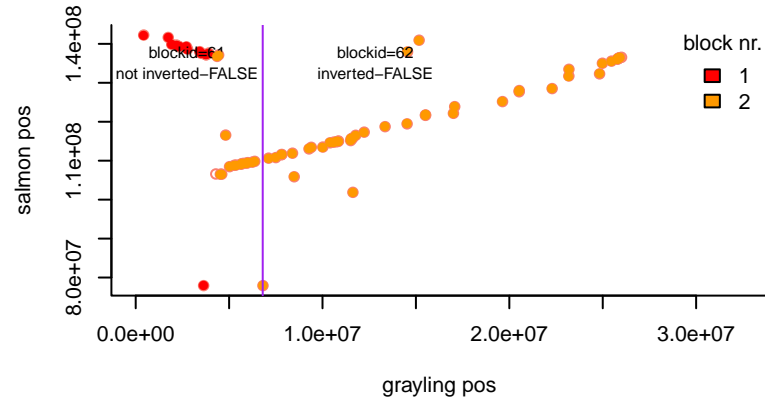

14B

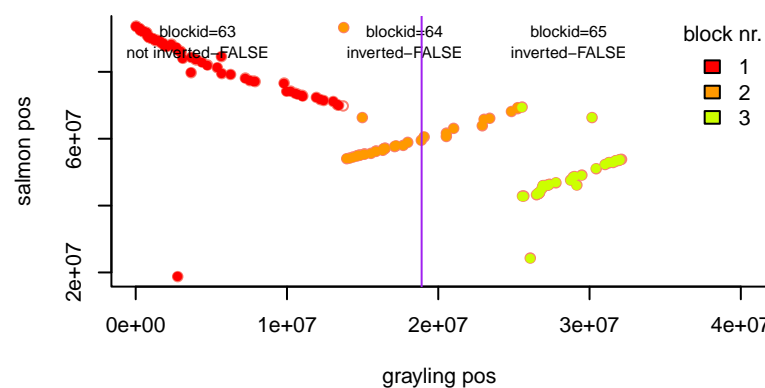

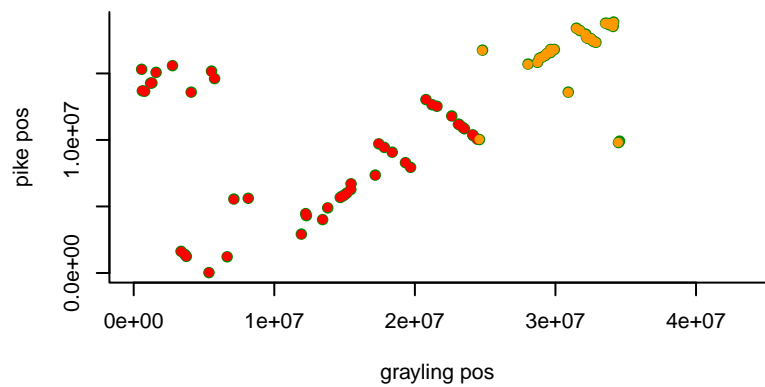

15A

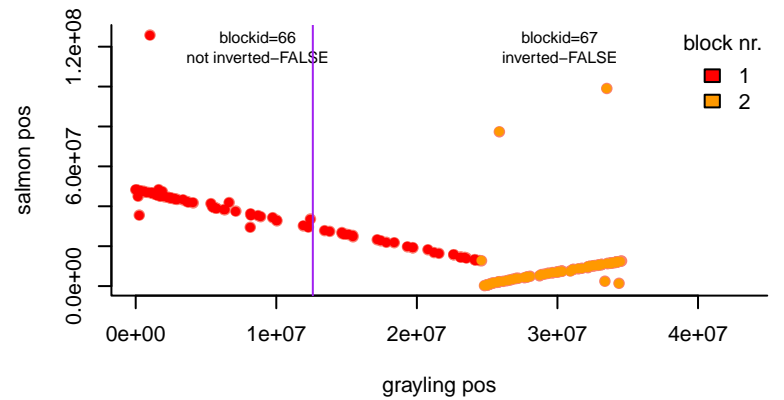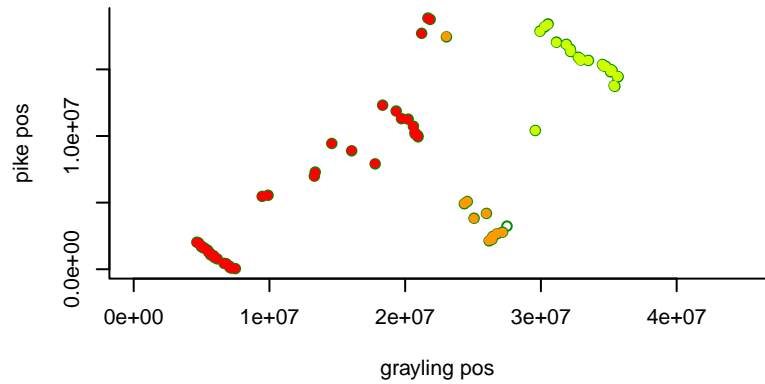

15B

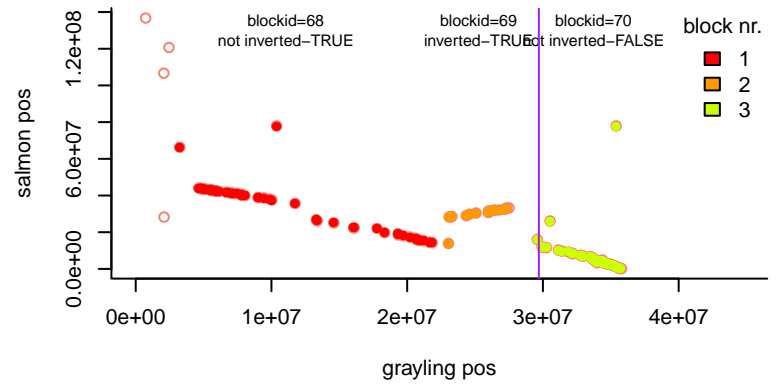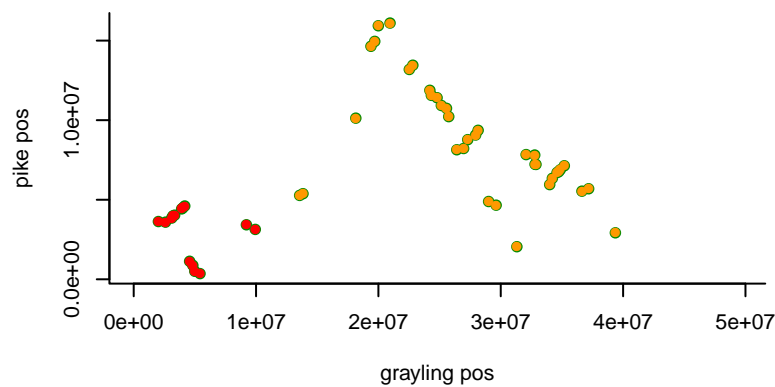

16A

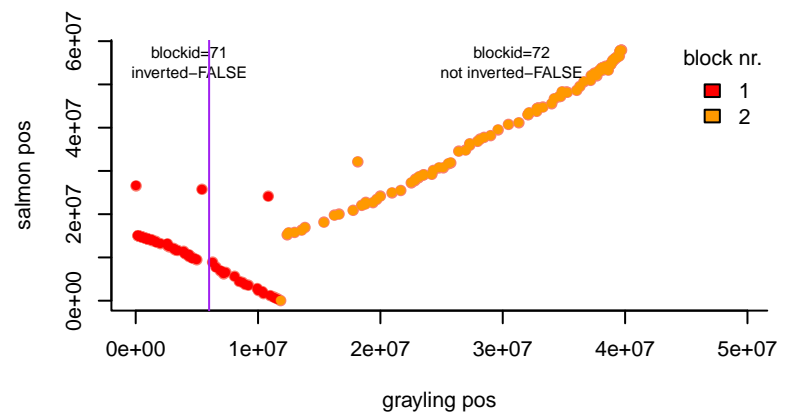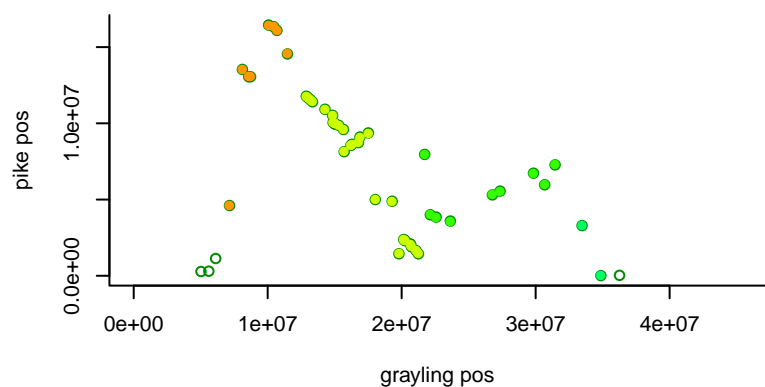

16B

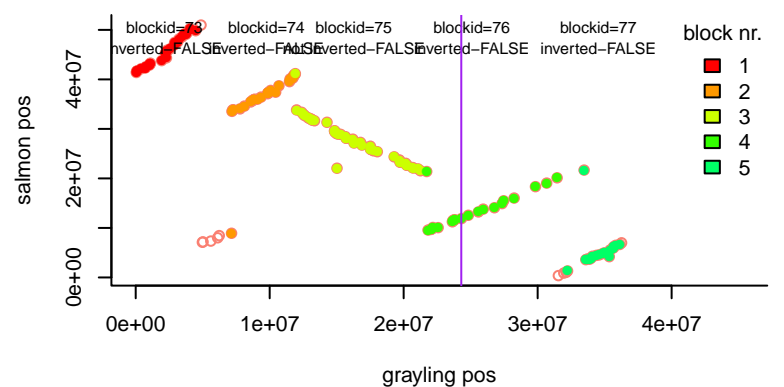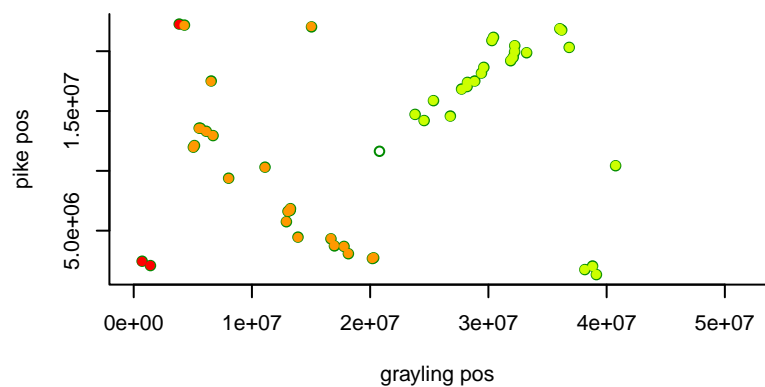

17A

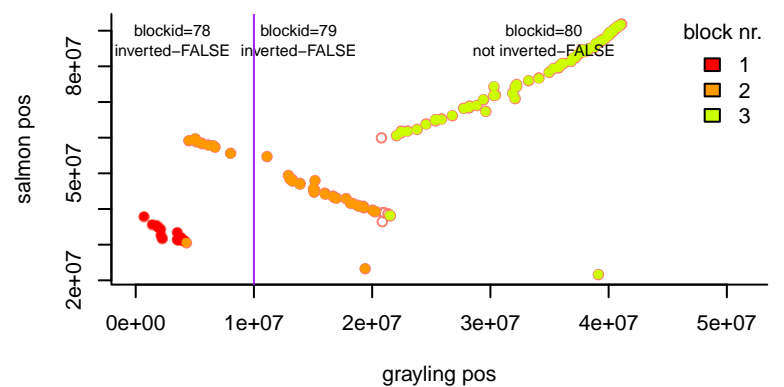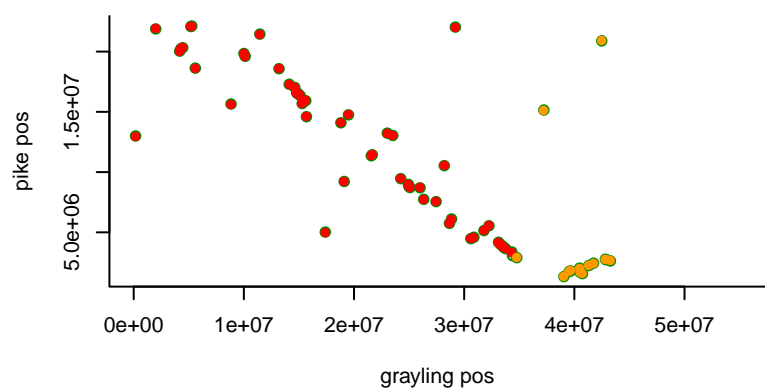

17B

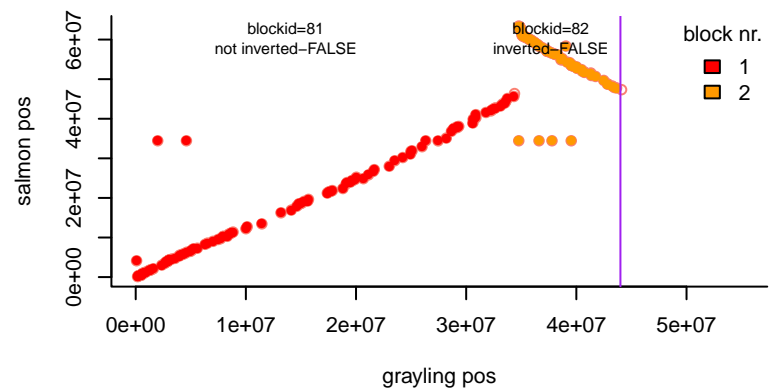

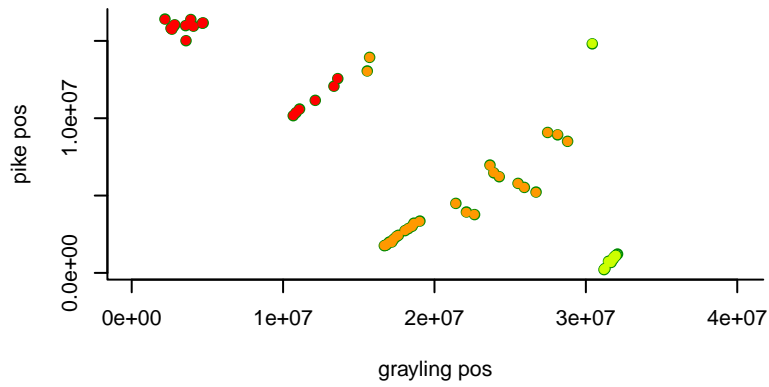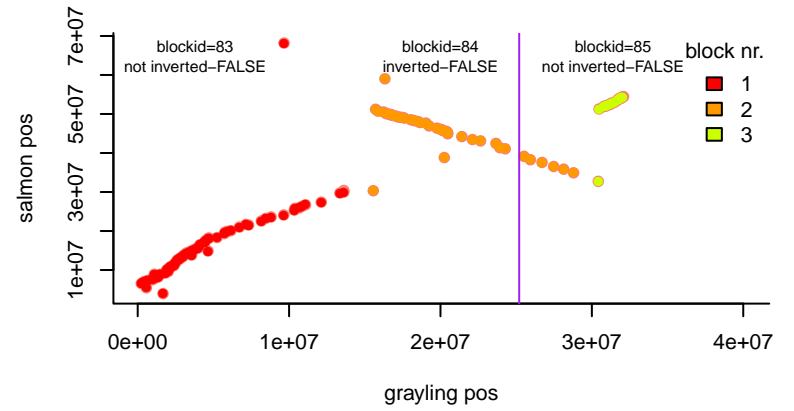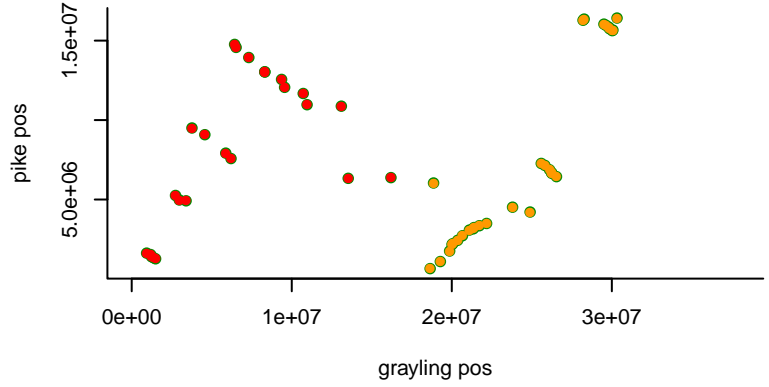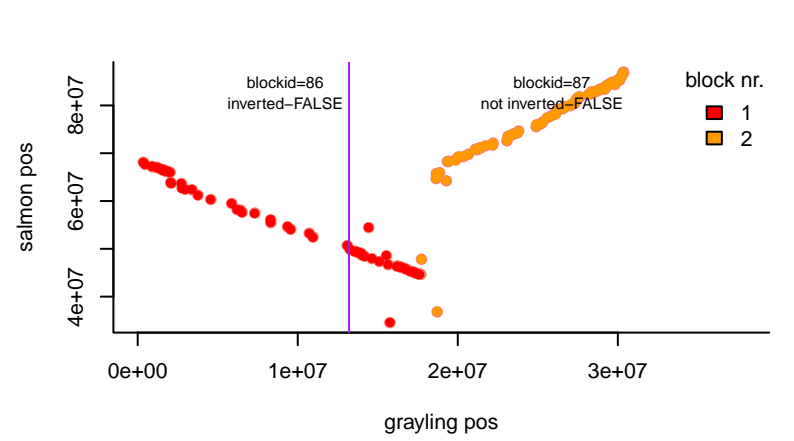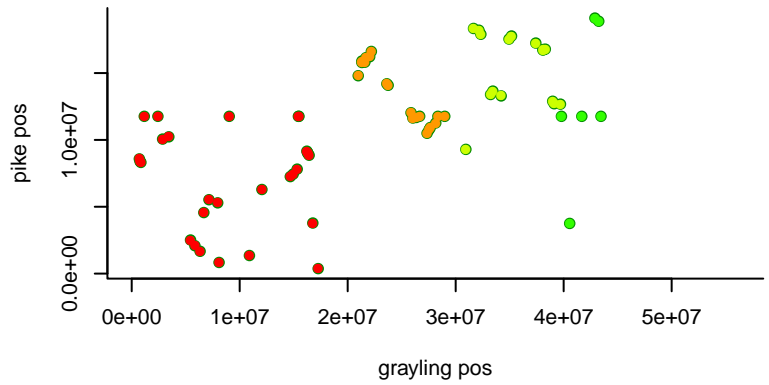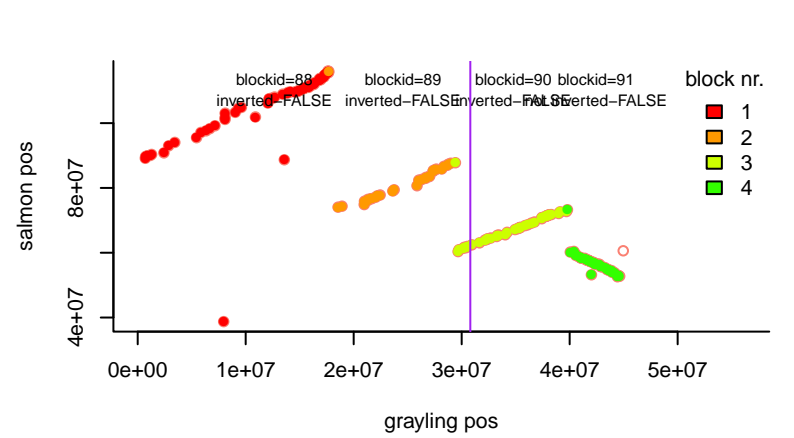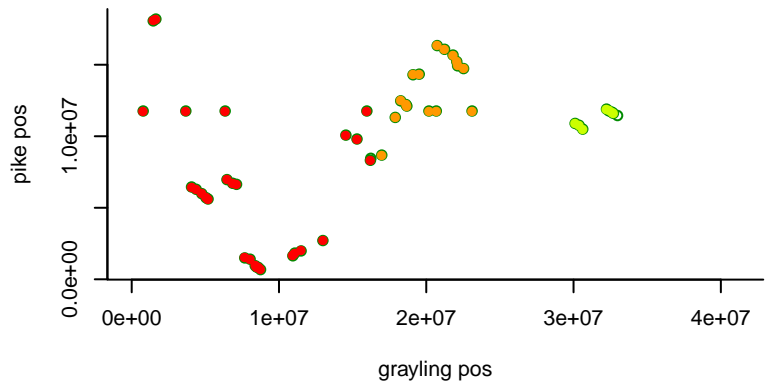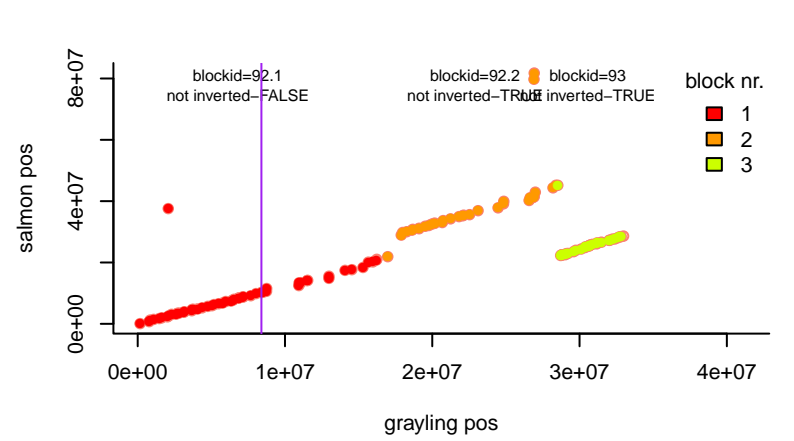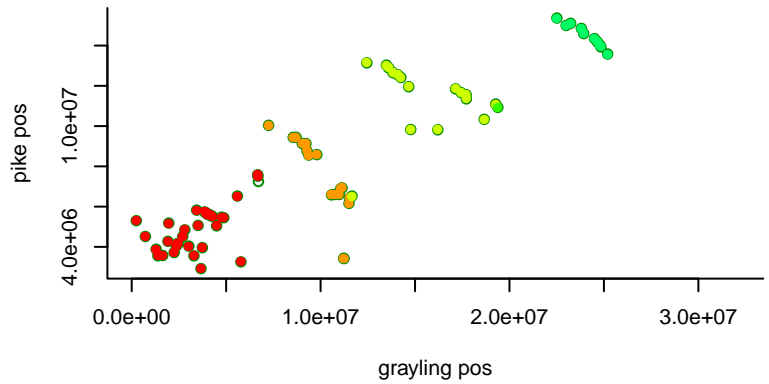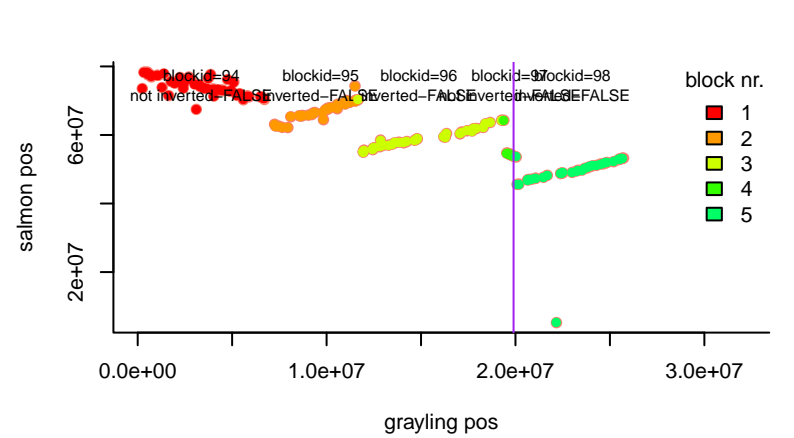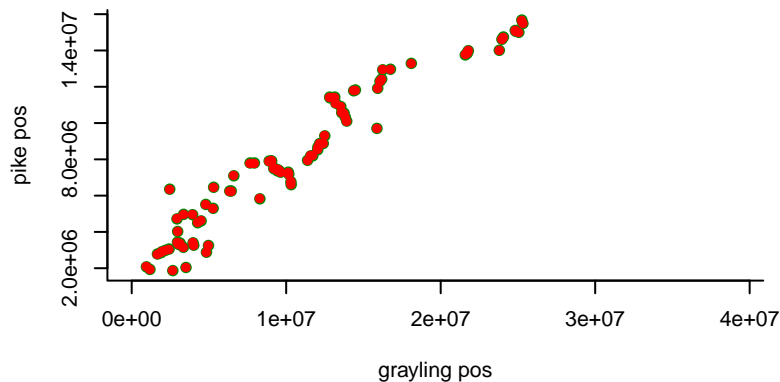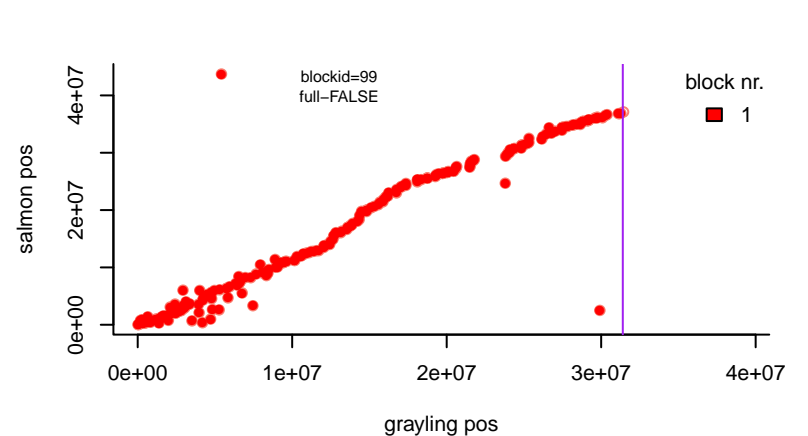

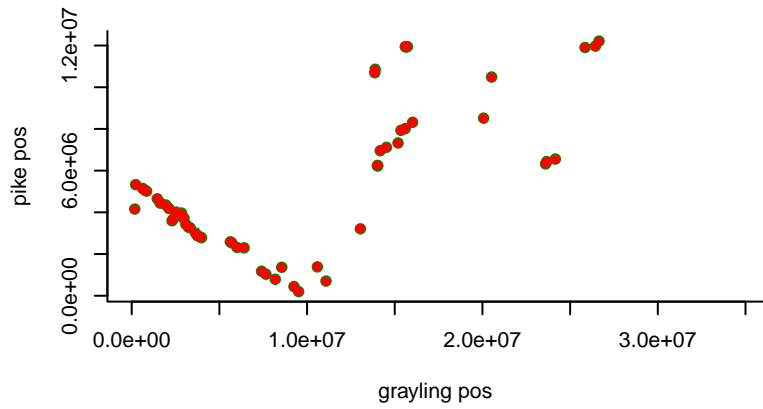

21A

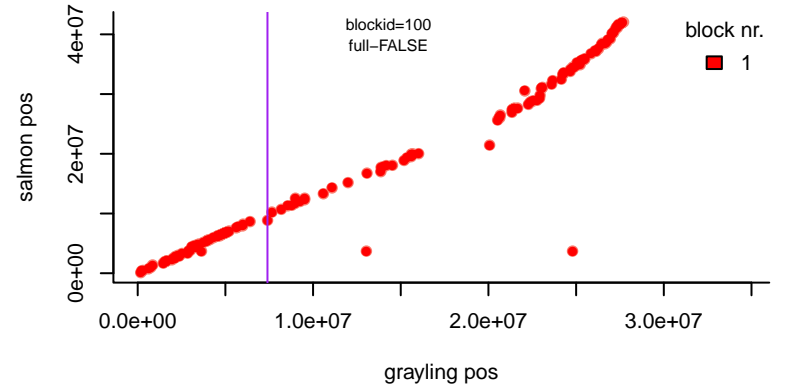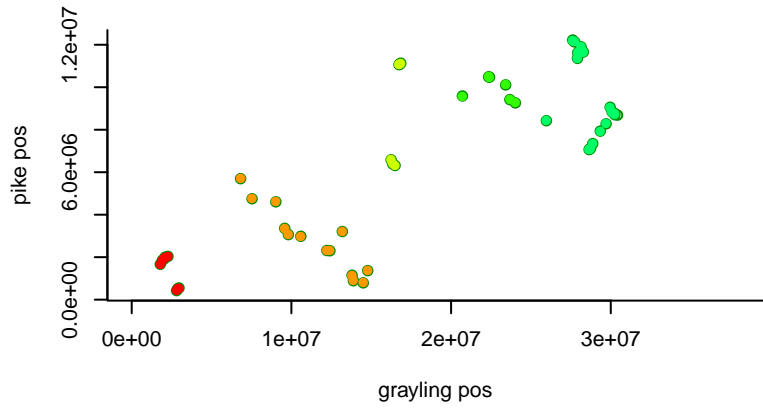

21B

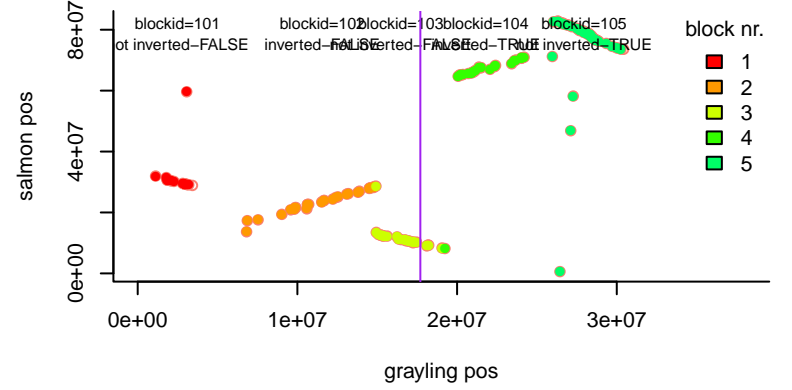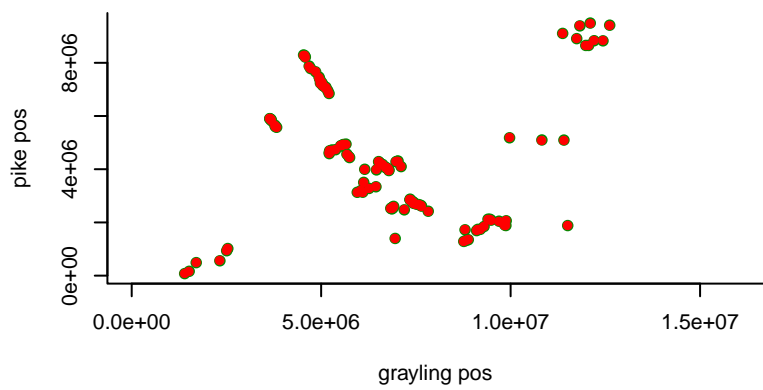

22A

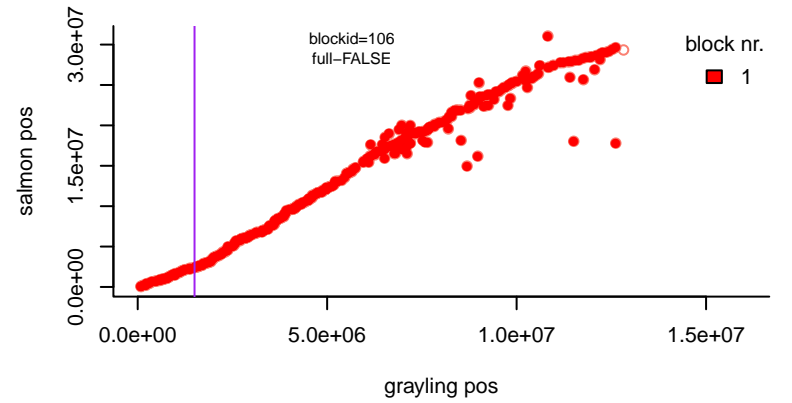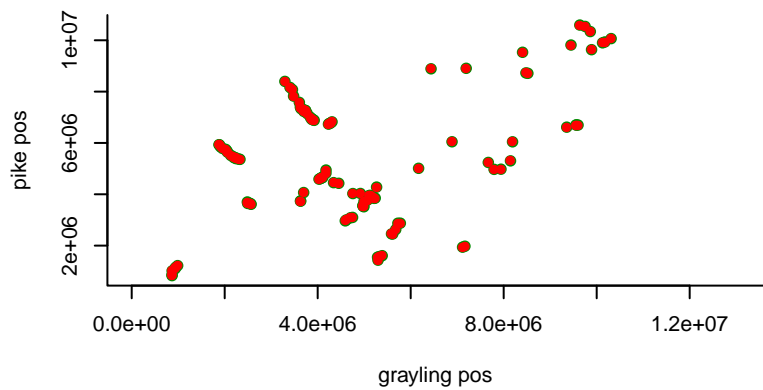

22B

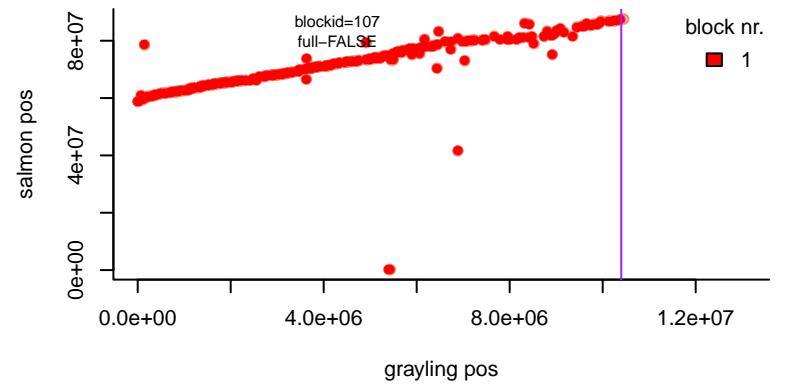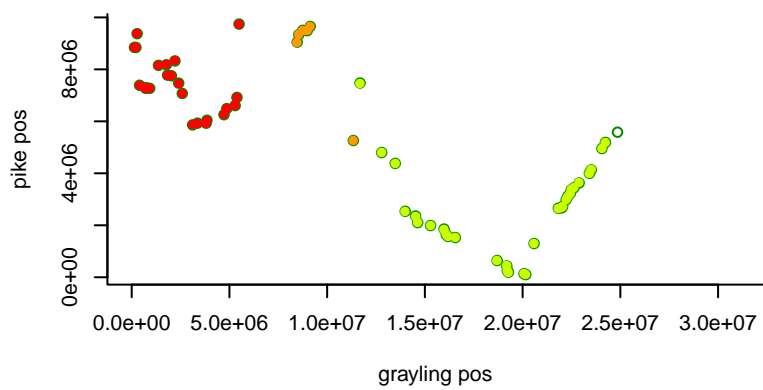

23A

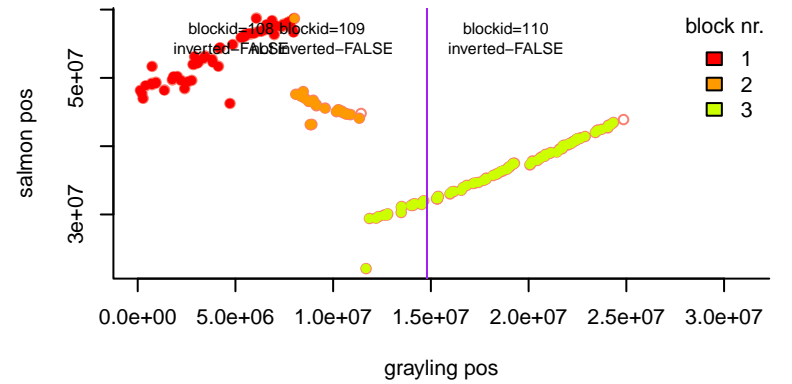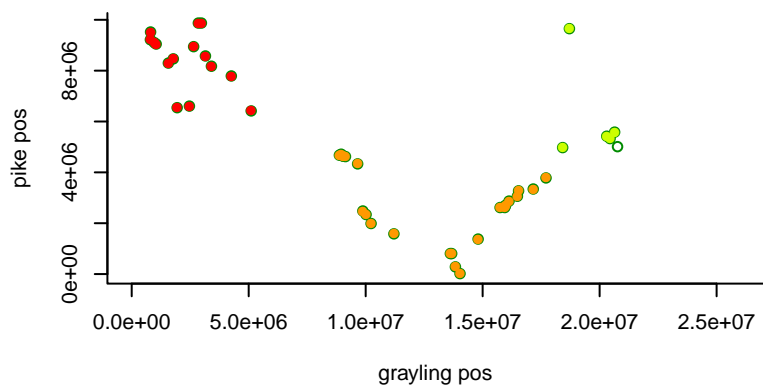

23B

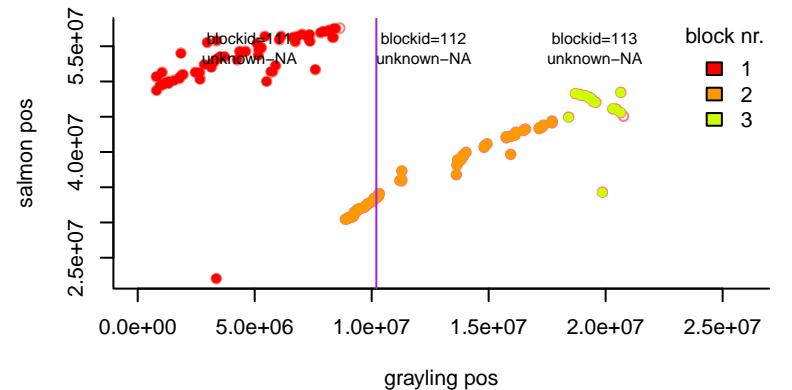

24A

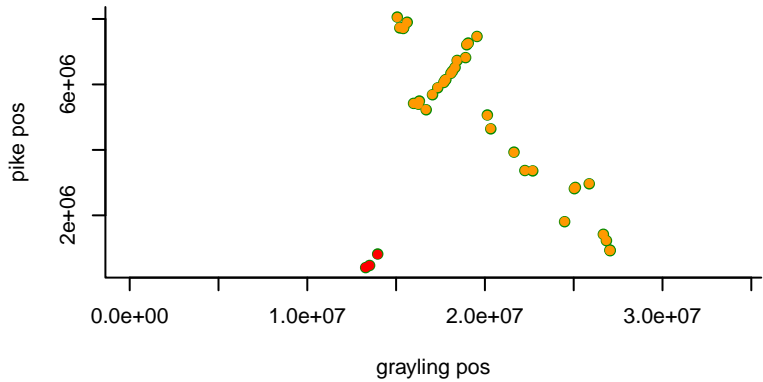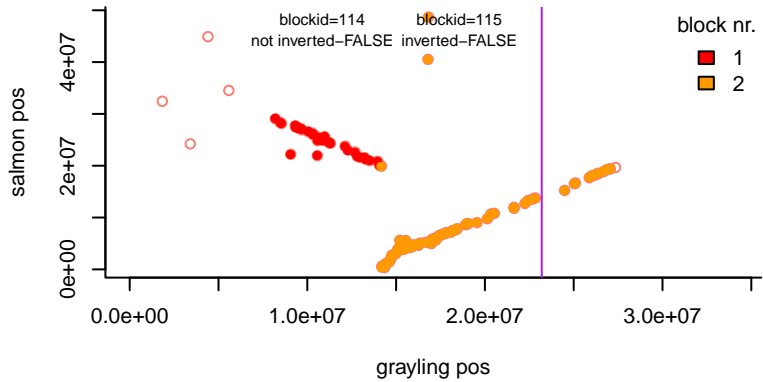

24B

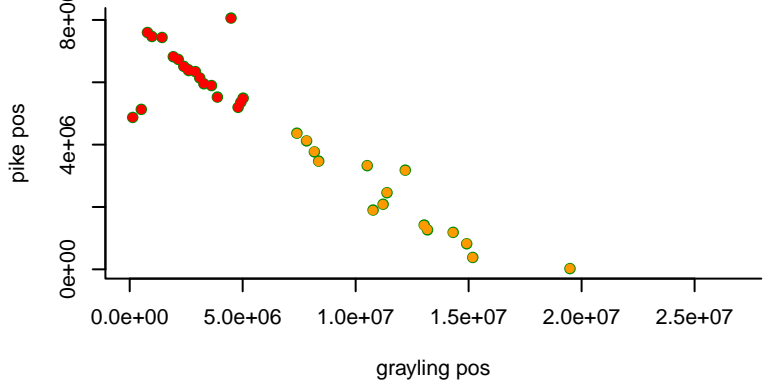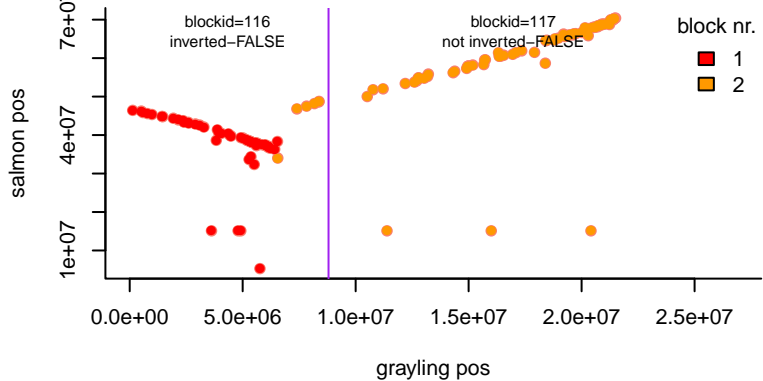

25A

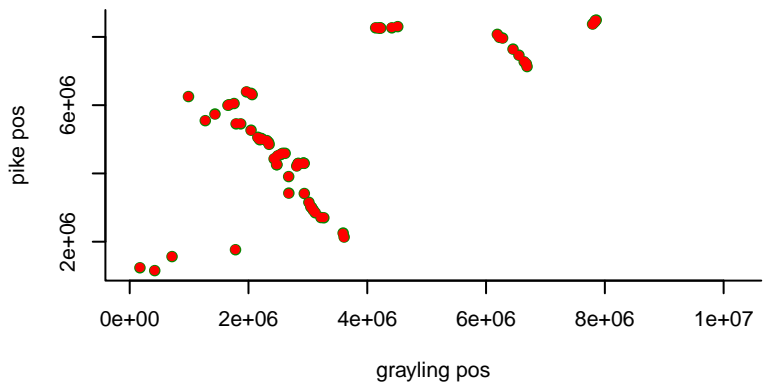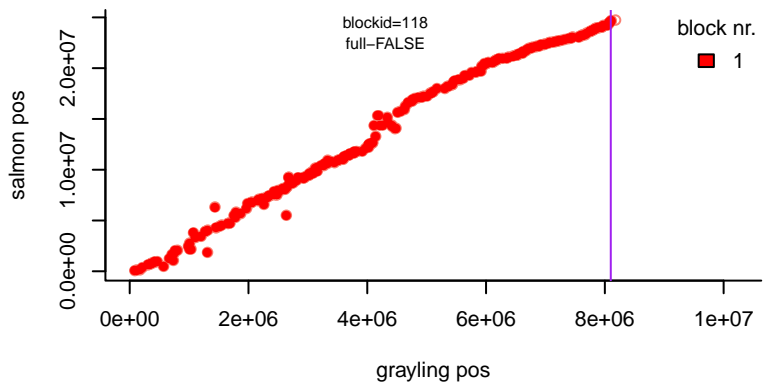

25B

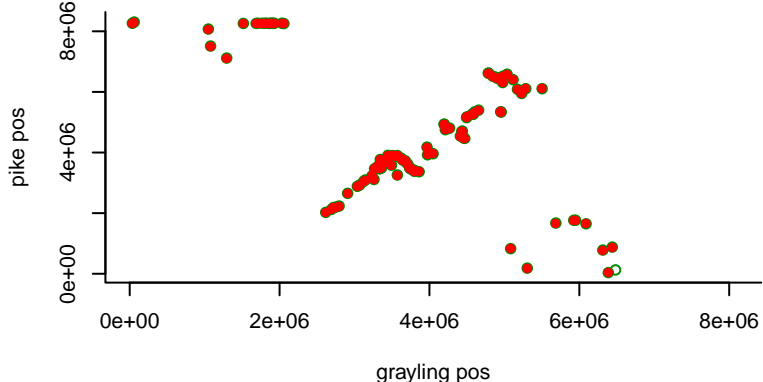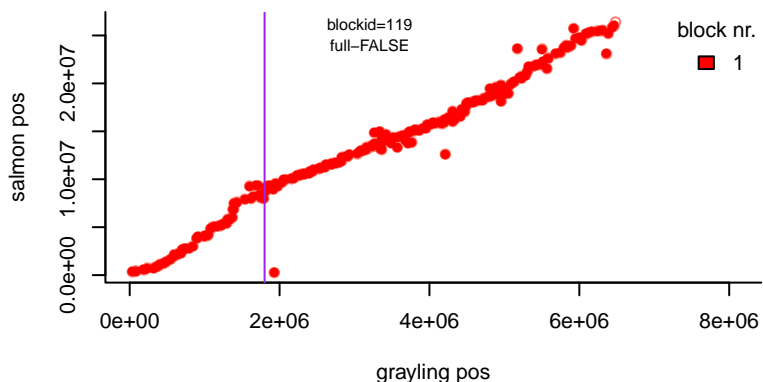

Figure S5

Phylogenetic data of the salmonids combined with karyotypic information. 2N and NF from Phillips & Ráb (2001). Highlighted are the locations of the salmonid species belonging to the Thymallinae subfamily as well as Atlantic salmon. For comparison, the figure shows also the hypothetical teleost ancestor (Phillips & Ráb 2001) and Northern pike (Rondeau et al. 2014), dating prior to salmonid specific whole-genome duplication, are placed in the figure. Axes for the extant salmonids are on the bottom and on the left side, and axes for the Northern pike and hypothetical teleost ancestor on the top and on the right side of the plot.

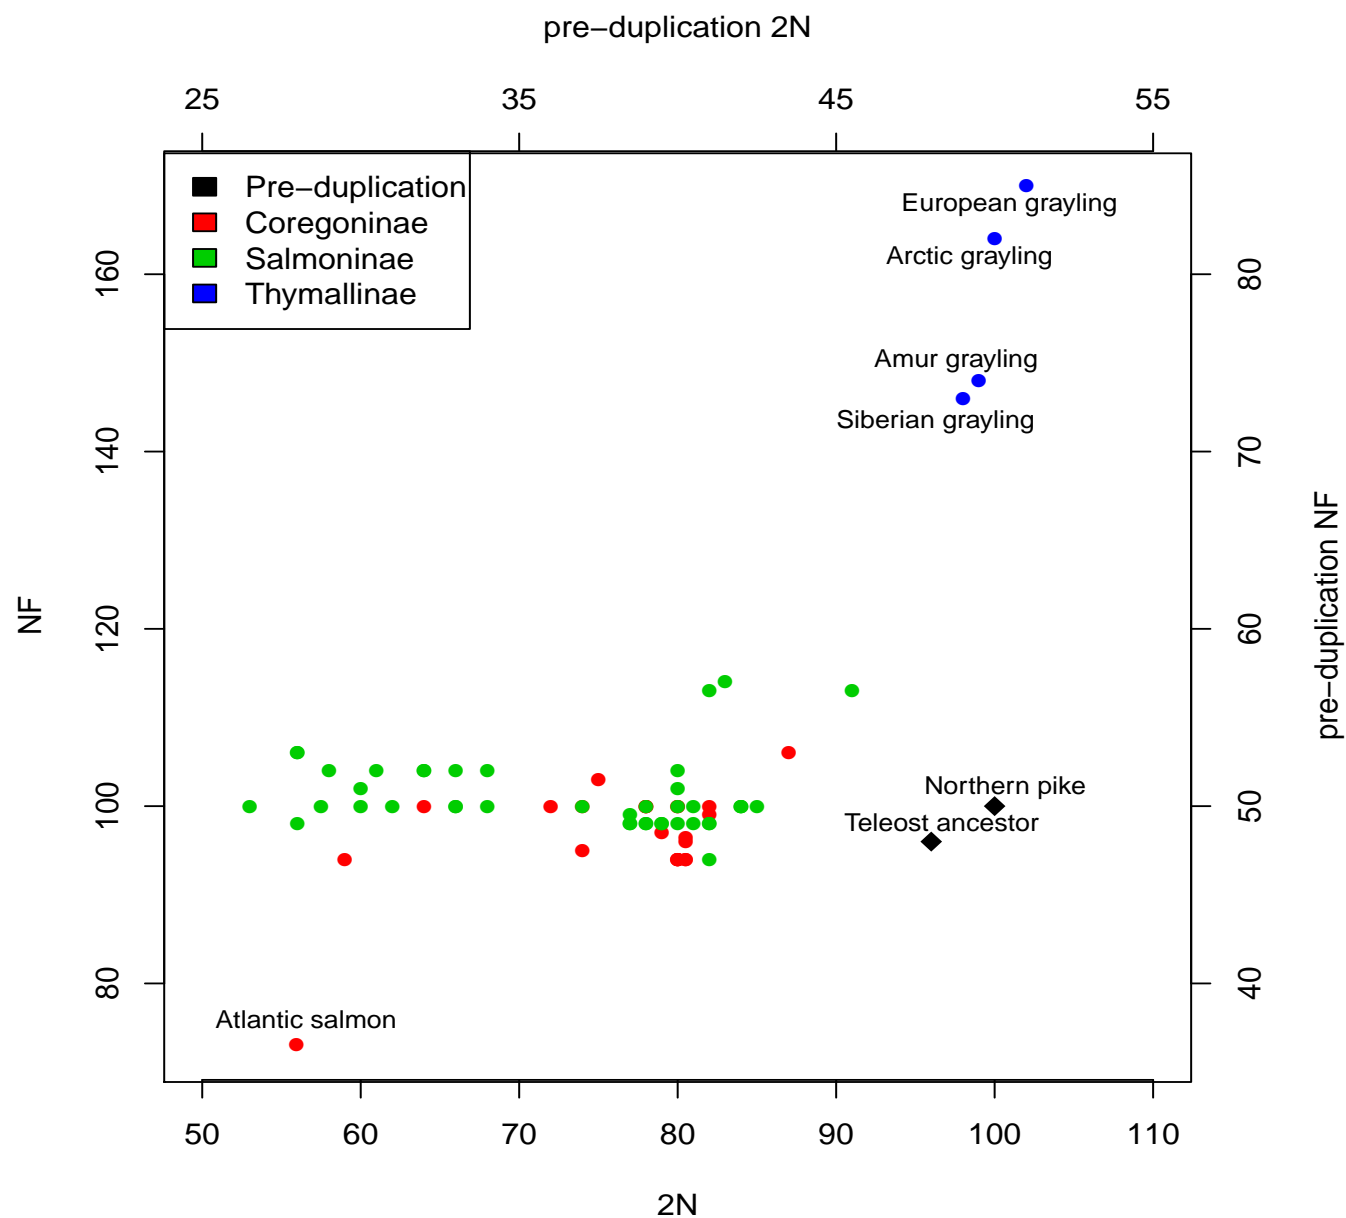

References

Phillips, R., & Ráb, P. (2001). Chromosome evolution in the Salmonidae (Pisces): an update. *Biological Reviews of the Cambridge Philosophical Society*, 76(1), 1–25. <https://doi.org/10.1111/j.1469-185X.2000.tb00057.x>

Rondeau EB, Minkley DR, Leong JS, Messmer AM, Jantzen JR, von Schalburg KR, Lemon C, Bird NH, Koop BF. 2014. The Genome and Linkage Map of the Northern Pike (*Esox lucius*): Conserved Synteny Revealed between the Salmonid Sister Group and the Neoteleostei. *PLoS One* 9(7): e102089. [10.1371/journal.pone.0102089](https://doi.org/10.1371/journal.pone.0102089).
